# Supplementary material for: Total synthesis and biological evaluation of histone deacetylase inhibitor WF-3161
Source: Royal Society of Chemistry journal article supplement (doi:10.1039/d3ob00641g), 2023-01-01
Supplement: d3ob00641g1.pdf [file d3ob00641g1.pdf]

## Total synthesis and biological evaluation of histone deacetylase inhibitor WF-3161

Michael Kohr,<sup>a</sup> Niklas Papenkordt,<sup>b</sup> Manfred Jung<sup>b</sup> and Uli Kazmaier<sup>a \*</sup>

### Supporting Information

#### Table of Contents

|                              |    |
|------------------------------|----|
| General Information.....     | 2  |
| Synthesis of Compounds ..... | 2  |
| NMR spectra .....            | 22 |
| Biological Assays.....       | 52 |

## General Information

All air and moisture sensitive reactions were carried out in dried glassware (> 100 °C) under nitrogen or argon atmosphere. THF was dried over sodium and distilled before use. The products were purified by automated column chromatography on silica columns (RediSep Rf, Teledyne Isco) or C18 columns (Telos/Büchi). Mixtures of ethyl acetate (EtOAc), petroleum ether (PE, 40–60 °C fraction), cyclohexane, dichloromethane (DCM), methanol (MeOH) or acetonitrile (MeCN) and water were generally used as eluents. Analytical TLC was performed on pre-coated silica gel plates (Macherey-Nagel, Polygram Sil G/UV<sub>254</sub>). Detection was accomplished with UV light (254 nm), KMnO<sub>4</sub> solution, ninhydrin solution or ceric ammonium sulfate solution. Compounds were occasionally freeze-dried with a Christ lyophiliser. Melting points were detected with a MEL-TEMP II (Laboratory devices) apparatus and are uncorrected. <sup>1</sup>H and <sup>13</sup>C NMR spectra were recorded with a Bruker AV400 [400 MHz (<sup>1</sup>H) and 100 MHz (<sup>13</sup>C)] or a Bruker AV500 [500 MHz (<sup>1</sup>H) and 125 MHz (<sup>13</sup>C)] spectrometer. For some rotamer containing samples the NMR spectra were measured at 373 K. Chemical shifts are reported in ppm relative to TMS or internal solvent signal. Mass spectra were recorded with a Finnigan MAT 95 spectrometer (quadrupole) using the CI technique or a Bruker maXis 4G UHR-TOF using the ESI technique. Optical rotations were measured with a Perkin-Elmer polarimeter (model 241 or 341) in a thermostated (20 °C ± 0.1 °C) cuvette, using a sodium vapour lamp (λ = 589 nm) as radiation source. The concentrations are given in g per 100 mL. LCMS analyses were accomplished on a Shimadzu (LC-10At, autoinjector SCL-6B, mass spectrometer LCMS-2020) with a Phenomenex Luna C18(2) column (50 x 4.6 mm, grain size 3 μm).

## Synthesis of Compounds

### **[[[(4S,5S)-5-{{(Z)-4-[(4-Methoxybenzyl)oxy]but-1-ene-1-yl}-2,2-dimethyl-1,3-dioxolan-4-yl)methoxy]triisopropylsilane (3)**

Alcohol **1** was synthesized according to a modified literature procedure.<sup>1</sup>

#### Swern-oxidation:

DMSO (2.4 mL, 2.67 g, 34.1 mmol, 3.0 equiv) was added to a solution of oxalyl chloride (1.6 mL, 2.31 g, 18.2 mmol, 1.6 equiv) in DCM (46 mL) keeping the reaction temperature between –71 °C and –66 °C. After stirring the reaction mixture for 5 minutes, a solution of alcohol **1** (3.63 g, 11.4 mmol, 1.0 equiv) in DCM (23 mL) was added dropwise keeping the temperature below –65 °C. After stirring the solution for 30 minutes, triethylamine (7.95 mL, 5.76 g, 56.9 mmol, 5.0 equiv) was added dropwise keeping the temperature below –60 °C before replacing the cooling bath with an ice bath. The reaction mixture was stirred for 60 minutes at 0 °C and thereafter hydrolyzed with distilled water. After phase separation, the organic phase was washed twice with water and thereafter dried with Na<sub>2</sub>SO<sub>4</sub>. The solvent was evaporated in vacuo and the obtained aldehyde was used in the next step without further purification.

#### Wittig-reaction:

A solution of KHMDS (25.0 mL, 12.5 mmol, 1.1 equiv) in toluene (0.5 M) was added dropwise to a mixture of Wittig salt **2**<sup>2</sup> (7.12 g, 13.7 mmol, 1.2 equiv) in THF (137 mL) at 0 °C, resulting in a red colored reaction mixture. After stirring the solution for 30 minutes, a mixture of the previously synthesized aldehyde in THF (2 mL) was added and the reaction mixture was stirred for 75 minutes at 0 °C before being hydrolyzed with water. After phase separation, the aqueous phase was extracted with diethyl

<sup>1</sup> A. Horn, U. Kazmaier, *Org. Lett.* 2019, **21**, 4595–4599.

<sup>2</sup> M. Brovetto, G. Seoane, *J. Org. Chem.* 2008, **73**, 5776–5785.

ether and the combined organics thereafter dried with Na<sub>2</sub>SO<sub>4</sub>. After solvent removal in vacuo, the crude product was purified by flash chromatography (SiO<sub>2</sub>, PE:EtOAc 100:0 → 80:20) to afford alkene **3** (4.72 g, 9.86 mmol, 87 % over 2 steps) as a yellowish oil. *R<sub>f</sub>* (**3**) = 0.47 (SiO<sub>2</sub>, PE:EtOAc 80:20); [ $\alpha$ ]<sub>D</sub><sup>20</sup> = -0.6 [c = 1.0, CHCl<sub>3</sub>].

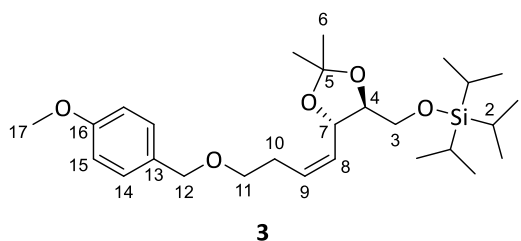

**<sup>1</sup>H-NMR (400 MHz, CDCl<sub>3</sub>):**  $\delta$  = 1.03 – 1.13 (m, 21 H, 1-H, 2-H), 1.41 (s, 3 H, 6-H), 1.43 (s, 3 H, 6-H'), 2.41 (ddtd, <sup>2</sup>*J*<sub>10a,10b</sub> = 14.5 Hz, <sup>3</sup>*J*<sub>10a,9</sub> = 7.1 Hz <sup>3</sup>*J*<sub>10a,11</sub> = 6.9 Hz, <sup>4</sup>*J*<sub>10a,8</sub> = 1.5 Hz, 1 H, 10-H<sub>a</sub>), 2.53 (ddtd, <sup>3</sup>*J*<sub>10b,10a</sub> = 14.5 Hz, <sup>3</sup>*J*<sub>10b,9</sub> = 7.6 Hz <sup>3</sup>*J*<sub>10b,11</sub> = 6.9 Hz, <sup>4</sup>*J*<sub>10b,8</sub> = 1.4 Hz, 1 H, 10-H<sub>b</sub>), 3.47 (t, <sup>3</sup>*J*<sub>11,10</sub> = 6.9 Hz, 2 H, 11-H), 3.71 (dd, <sup>2</sup>*J*<sub>3a,3b</sub> = 11.1 Hz, <sup>3</sup>*J*<sub>3a,4</sub> = 3.6 Hz, 1 H, 3-H<sub>a</sub>), 3.76 (ddd, <sup>3</sup>*J*<sub>4,7</sub> = 8.2 Hz, <sup>3</sup>*J*<sub>4,3a</sub> = 3.6 Hz, <sup>3</sup>*J*<sub>4,3b</sub> = 3.4 Hz, 1 H, 4-H), 3.80 (s, 3 H, 17-H), 3.88 (dd, <sup>2</sup>*J*<sub>3b,3a</sub> = 11.1 Hz, <sup>3</sup>*J*<sub>3b,4</sub> = 3.4 Hz, 1 H, 3-H<sub>b</sub>), 4.43 (s, 2 H, 12-H), 4.80 (ddd, <sup>3</sup>*J*<sub>7,8</sub> = 8.9 Hz, <sup>3</sup>*J*<sub>7,4</sub> = 8.2 Hz, <sup>4</sup>*J*<sub>7,9</sub> = 0.5 Hz, 1 H, 7-H), 5.50 (dddd, <sup>3</sup>*J*<sub>8,9</sub> = 10.9 Hz, <sup>3</sup>*J*<sub>8,7</sub> = 8.9 Hz, <sup>4</sup>*J*<sub>8,10a</sub> = 1.5 Hz, <sup>4</sup>*J*<sub>8,10b</sub> = 1.4 Hz, 1 H, 8-H), 5.72 (dddd, <sup>3</sup>*J*<sub>9,8</sub> = 10.9 Hz, <sup>3</sup>*J*<sub>9,10b</sub> = 7.6 Hz, <sup>3</sup>*J*<sub>9,10a</sub> = 7.1 Hz, <sup>4</sup>*J*<sub>9,7</sub> = 0.5 Hz, 1 H, 9-H), 6.87 (m, 2 H, 15-H), 7.25 (m, 2 H, 14-H). **<sup>13</sup>C-NMR (100 MHz, CDCl<sub>3</sub>):**  $\delta$  = 11.9 (d, C-2), 17.9 (q, C-1), 18.0 (q, C-1'), 26.9 (q, C-6), 27.3 (q, C-6'), 28.4 (t, C-10), 55.3 (q, C-17), 62.1 (t, C-3), 69.4 (t, C-11), 72.5 (t, C-12), 73.1 (d, C-7), 81.8 (d, C-4), 108.8 (s, C-5), 113.7 (d, C-15), 128.3 (d, C-8), 129.2 (d, C-14), 130.5 (s, C-13), 131.8 (d, C-9), 159.1 (s, C-16).

**HRMS (CI)** calculated for C<sub>27</sub>H<sub>46</sub>O<sub>5</sub>Si [M]<sup>+</sup>: 478.3109, found: 478.3125.

#### 4-((4*S*,5*S*)-2,2-Dimethyl-5-[(triisopropylsilyloxy)methyl]-1,3-dioxolan-4-yl)butan-1-ol (**4**)

Palladium on charcoal (417 mg, 10 wt% Pd) was added to a solution of alkene **3** (4.17 g, 8.71 mmol, 1.0 equiv) in methanol (44 mL) and the resulting suspension was stirred under hydrogen atmosphere (1 atm) for 16 hours. Subsequently, the reaction mixture was filtrated through a pad of Celite before removing the solvent in vacuo. The saturated product (4.13 g, 8.59 mmol, 99 % d. Th.) was obtained as a yellowish oil. *R<sub>f</sub>* = 0.45 (Kieselgel, PE:EE 80:20); [ $\alpha$ ]<sub>D</sub><sup>20</sup> = -3.8 [c = 1.0, CHCl<sub>3</sub>].

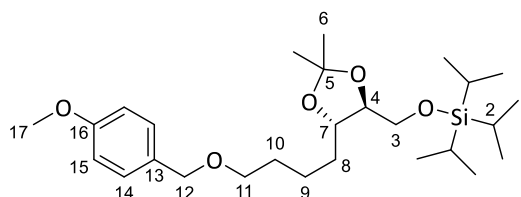

**<sup>1</sup>H-NMR (400 MHz, CDCl<sub>3</sub>):**  $\delta$  = 1.03 – 1.16 (m, 21 H, 1-H, 2-H), 1.37 (s, 3 H, 6-H), 1.40 (s, 3 H, 6-H'), 1.45 – 1.74 (m, 6 H, 8-H, 9-H, 10-H), 3.45 (t, <sup>3</sup>*J*<sub>11,10</sub> = 6.5 Hz, 2 H, 11-H), 3.69 (ddd, <sup>3</sup>*J*<sub>4,7</sub> = 7.6 Hz, <sup>3</sup>*J*<sub>4,3a</sub> = 5.9 Hz, <sup>3</sup>*J*<sub>4,3b</sub> = 4.0 Hz, 1 H, 4-H), 3.75 (dd, <sup>2</sup>*J*<sub>3a,3b</sub> = 10.2 Hz, <sup>3</sup>*J*<sub>3a,4</sub> = 5.9 Hz, 1 H, 3-H<sub>a</sub>), 3.80 (s, 3 H, 17-H), 3.87 (dd, <sup>2</sup>*J*<sub>3b,3a</sub> = 10.2 Hz, <sup>3</sup>*J*<sub>3b,4</sub> = 4.0 Hz, 1 H, 3-H<sub>b</sub>), 3.94 (ddd, <sup>3</sup>*J*<sub>7,4</sub> = <sup>3</sup>*J*<sub>7,8a</sub> = 7.6 Hz, <sup>3</sup>*J*<sub>7,8b</sub> = 3.7 Hz, 1 H, 7-H), 4.42 (s, 2 H, 12-H), 6.87 (m, 2 H, 15-H), 7.25 (m, 2 H, 14-H). **<sup>13</sup>C-NMR (100 MHz, CDCl<sub>3</sub>):**  $\delta$  = 11.9 (d, C-2), 18.0 (q, C-1), 22.8 (t, C-9), 27.0 (q, C-6), 27.4 (q, C-6'), 29.8 (t, C-8), 33.4 (t, C-10), 55.3 (q, C-17), 64.2 (t, C-3), 70.0 (t, C-11), 72.6 (t, C-12), 79.1 (d, C-7), 81.0 (d, C-4), 108.3 (s, C-5), 113.7 (d, C-15), 129.2 (d, C-14), 130.7 (s, C-13), 159.1 (s, C-16).

**HRMS (CI)** calculated for C<sub>27</sub>H<sub>47</sub>O<sub>5</sub>Si [M-H]<sup>+</sup>: 479.3187, found: 479.3199.

DDQ (387 mg, 1.71 mmol, 1.1 equiv) was added to a solution of the previously synthesized saturated compound (746 mg, 1.55 mmol, 1.0 equiv) in DCM:H<sub>2</sub>O (20:1, 15.5 mL) and the resulting solution was stirred for 2 hours at room temperature. Subsequently, the reaction mixture was treated with NaHCO<sub>3</sub>-

solution (saturated) and the phases thereafter separated. The aqueous phase was extracted three times with DCM and the combined organics were dried with Na<sub>2</sub>SO<sub>4</sub>. After solvent removal in vacuo, the crude product was purified by flash chromatography (SiO<sub>2</sub>, PE:EtOAc 100:0 → 50:50) to afford alcohol **4** (462 mg, 1.28 mmol, 83 %) as a colorless resin.  $R_f$  (**4**) = 0.19 (SiO<sub>2</sub>, PE:EtOAc 80:20);  $[\alpha]_D^{20} = -3.6$  [ $c = 1.0$ , CHCl<sub>3</sub>].

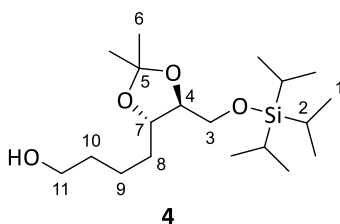

**<sup>1</sup>H-NMR (400 MHz, CDCl<sub>3</sub>):**  $\delta = 1.04 - 1.14$  (m, 21 H, 1-H, 2-H), 1.37 (s, 3 H, 6-H), 1.40 (s, 3 H, 6-H'), 1.43 – 1.77 (m, 7 H, 8-H, 9-H, 10-H, O-H), 3.66 (t,  $^3J_{11,10} = 6.3$  Hz, 2 H, 11-H), 3.70 (ddd,  $^3J_{4,7} = 7.7$  Hz,  $^3J_{4,3a} = 6.0$  Hz,  $^3J_{4,3b} = 3.8$  Hz, 1 H, 4-H), 3.75 (dd,  $^2J_{3a,3b} = 10.2$  Hz,  $^3J_{3a,4} = 6.0$  Hz, 1 H, 3-H<sub>a</sub>), 3.88 (dd,  $^2J_{3b,3a} = 10.2$  Hz,  $^3J_{3b,4} = 3.8$  Hz, 1 H, 3-H<sub>b</sub>), 3.95 (ddd,  $^3J_{7,8b} = ^3J_{7,4} = 7.7$  Hz,  $^3J_{7,8a} = 3.6$  Hz, 1 H, 7-H). **<sup>13</sup>C-NMR (100 MHz, CDCl<sub>3</sub>):**  $\delta = 11.9$  (d, C-2), 17.9 (q, C-1), 22.4 (t, C-9), 26.9 (q, C-6), 27.4 (q, C-6'), 32.7 (t, C-10), 33.1 (t, C-8), 62.8 (t, C-11), 64.2 (t, C-3), 79.2 (d, C-7), 80.9 (d, C-4), 108.4 (s, C-5).

**HRMS (CI)** calculated for C<sub>19</sub>H<sub>41</sub>O<sub>4</sub>Si [M+H]<sup>+</sup>: 361.2769, found: 361.2774.

#### **{[(4*S*,5*S*)-5-(4-iodobutyl)-2,2-dimethyl-1,3-dioxolan-4-yl]methoxy}triisopropylsilane (5)**

Triphenylphosphine (1.90 g, 7.24 mmol, 1.25 equiv) and imidazole (493 mg, 7.24 mmol, 1.25 equiv) were dissolved in DCM (26 mL) and the resulting solution was cooled to 0 °C. Iodine (1.83 g, 7.21 mmol, 1.24 equiv) was added and the mixture was stirred at room temperature for 20 minutes. A solution of alcohol **4** (2.10 g, 5.82 mmol, 1.0 equiv) in DCM (13 mL) was added dropwise at 0 °C and the reaction mixture was stirred for 25 minutes at 0 °C followed by 3.5 hours at room temperature. Subsequently, the mixture was washed with Na<sub>2</sub>SO<sub>3</sub> solution (1 M) and the aqueous phase thereafter extracted twice with diethyl ether. The combined organic phases were dried over Na<sub>2</sub>SO<sub>4</sub> and the solvent was removed in vacuo. After flash chromatography (SiO<sub>2</sub>, PE:EtOAc 100:0 → 90:10) iodide **5** (2.55 g, 5.42 mmol, 93 %) was obtained as a colorless oil.  $R_f$  (**5**) = 0.63 (SiO<sub>2</sub>, PE:EtOAc 80:20);  $[\alpha]_D^{20} = -3.8$  [ $c = 1.0$ , CHCl<sub>3</sub>].

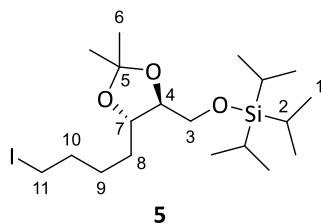

**<sup>1</sup>H-NMR (400 MHz, CDCl<sub>3</sub>):**  $\delta = 1.04 - 1.15$  (m, 21 H, 1-H, 2-H), 1.37 (s, 3 H, 6-H), 1.40 (s, 3 H, 6-H'), 1.48 – 1.75 (m, 4 H, 8-H, 9-H), 1.87 (tt,  $^3J_{10,9} = ^3J_{10,11} = 7.1$  Hz, 2 H, 10-H), 3.19 (t,  $^3J_{11,10} = 7.1$  Hz, 2 H, 11-H), 3.69 (ddd,  $^3J_{4,7} = 7.5$  Hz,  $^3J_{4,3a} = 6.1$  Hz,  $^3J_{4,3b} = 3.9$  Hz, 1 H, 4-H), 3.75 (dd,  $^2J_{3a,3b} = 10.0$  Hz,  $^3J_{3a,4} = 6.1$  Hz, 1 H, 3-H<sub>a</sub>), 3.88 (dd,  $^2J_{3b,3a} = 10.0$  Hz,  $^3J_{3b,4} = 3.9$  Hz, 1 H, 3-H<sub>b</sub>), 3.94 (ddd,  $^3J_{7,4} = ^3J_{7,8a} = 7.5$  Hz,  $^3J_{7,8b} = 3.4$  Hz, 1 H, 7-H). **<sup>13</sup>C-NMR (100 MHz, CDCl<sub>3</sub>):**  $\delta = 6.5$  (t, C-11), 11.9 (d, C-2), 18.0 (q, C-1), 27.0 (q, C-6), 27.2 (t, C-9), 27.4 (q, C-6'), 32.4 (t, C-8), 33.6 (t, C-10), 64.2 (t, C-3), 79.1 (d, C-7), 80.9 (d, C-4), 108.4 (s, C-5).

**HRMS (CI)** calculated for C<sub>19</sub>H<sub>40</sub>I O<sub>3</sub>Si [M+H]<sup>+</sup>: 471.1786, found: 471.1774.

**(2S)-7-(2,2-Dimethyl-5-[[[triisopropylsilyl]oxy]methyl]-1,3-dioxolan-4-yl)-2-(1,3-dioxoisindolin-2-yl)-N-(quinolin-8-yl)heptanamide (7)**

Alanine derivative **6** was synthesized according to a modified literature procedure.<sup>3</sup>

Silver carbonate (15.6 mg, 56.8  $\mu\text{mol}$ , 80 mol%), palladium acetate (1.6 mg, 7.10  $\mu\text{mol}$ , 10 mol%) and dibenzyl phosphate (5.9 mg, 21.3  $\mu\text{mol}$ , 30 mol%) were added successively to a solution of iodide **5** (43.3 mg, 92.0  $\mu\text{mol}$ , 1.3 equiv) and alanine derivative **6** (24.5 mg, 71.0  $\mu\text{mol}$ , 1.0 equiv) in a *tert*-amyl alcohol/1,2-dichloroethane mixture (1:1, 532  $\mu\text{L}$ ) and the resulting suspension was stirred at 60 °C for 25 hours. Subsequently, the brown suspension was concentrated in vacuo and the crude product purified by flash chromatography (SiO<sub>2</sub>, PE:EtOAc 100:0  $\rightarrow$  70:30) to afford compound **7** (39.6 mg, 57.6  $\mu\text{mol}$ , 81 %) as a colorless resin.  $R_f$  (**7**) = 0.43 (SiO<sub>2</sub>, PE:EtOAc 60:40);  $[\alpha]_D^{20} = -3.4$  [ $c = 1.0$ , CHCl<sub>3</sub>].

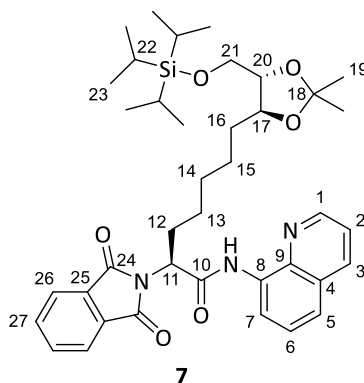

**<sup>1</sup>H-NMR (400 MHz, CDCl<sub>3</sub>):**  $\delta = 1.01 - 1.10$  (m, 21 H, 22-H, 23-H), 1.35 (s, 3 H, 19-H), 1.38 (s, 3 H, 19-H'), 1.40 – 1.69 (m, 8 H, 13-H, 14-H, 15-H, 16-H), 2.40 (m, 1 H, 12-H<sub>a</sub>), 2.59 (m, 1 H, 12-H<sub>b</sub>), 3.66 (ddd, <sup>3</sup>J<sub>20,17</sub> = 7.7 Hz, <sup>3</sup>J<sub>20,21a</sub> = 6.0 Hz, <sup>3</sup>J<sub>20,21b</sub> = 4.0 Hz, 1 H, 20-H), 3.73 (dd, <sup>2</sup>J<sub>21a,21b</sub> = 10.2 Hz, <sup>3</sup>J<sub>21a,20</sub> = 6.0 Hz, 1 H, 21-H<sub>a</sub>), 3.85 (dd, <sup>2</sup>J<sub>21b,21a</sub> = 10.2 Hz, <sup>3</sup>J<sub>21b,20</sub> = 4.0 Hz, 1 H, 21-H<sub>b</sub>), 3.91 (ddd, <sup>3</sup>J<sub>17,16b</sub> = <sup>3</sup>J<sub>17,20</sub> = 7.7 Hz, <sup>3</sup>J<sub>17,16a</sub> = 3.7 Hz, 1 H, 17-H), 5.12 (dd, <sup>3</sup>J<sub>11,12a/b</sub> = 10.9 Hz, <sup>3</sup>J<sub>11,12a/b</sub> = 5.3 Hz, 1 H, 11-H), 7.42 (dd, <sup>3</sup>J<sub>2,3</sub> = 8.2 Hz, <sup>3</sup>J<sub>2,1</sub> = 4.2 Hz, 1 H, 2-H), 7.49 – 7.53 (m, 2 H, 5-H, 6-H), 7.76 (m, 2 H, 27-H), 7.90 (m, 2 H, 26-H), 8.14 (dd, <sup>3</sup>J<sub>3,2</sub> = 8.2 Hz, <sup>4</sup>J<sub>3,1</sub> = 1.5 Hz, 1 H, 3-H), 8.70 (dd, <sup>3</sup>J<sub>1,2</sub> = 4.2 Hz, <sup>4</sup>J<sub>1,3</sub> = 1.5 Hz, 1 H, 1-H), 8.72 (dd, <sup>3</sup>J<sub>7,6</sub> = 5.3 Hz, <sup>4</sup>J<sub>7,5</sub> = 3.8 Hz, 1 H, 7-H), 10.33 (s, 1 H, N-H). **<sup>13</sup>C-NMR (100 MHz, CDCl<sub>3</sub>):**  $\delta = 11.8$  (d, C-22), 17.9 (q, C-23), 26.0 (t, C-15), 26.7 (t, C-13), 27.0 (q, C-19), 27.4 (q, C-19'), 28.7 (t, C-12), 29.2 (t, C-14), 33.4 (t, C-16), 55.3 (d, C-11), 64.2 (t, C-21), 79.1 (d, C-17), 81.0 (d, C-20), 108.3 (s, C-18), 116.8 (d, C-7), 121.6 (d, C-2), 121.9 (d, C-5), 123.6 (d, C-26), 127.3 (d, C-6), 127.9 (s, C-4), 131.8 (s, C-25), 133.9 (s, C-8), 134.2 (d, C-27), 136.4 (d, C-3), 138.4 (s, C-9), 148.2 (d, C-1), 167.0 (s, C-10), 168.1 (s, C-24).

**HRMS (CI)** calculated for C<sub>39</sub>H<sub>53</sub>N<sub>3</sub>O<sub>6</sub> [M]<sup>+</sup>: 687.3698, found: 687.3711.

**(4R,5R)-2-[(R)-1-(Benzyloxy)-2-(trityloxy)ethyl]-4,5-dicyclohexyl-1,3,2-dioxaborolane (9)**

LDA preparation:

*n*-Butyllithium (1.6 M in hexanes, 6.65 mL, 10.6 mmol, 1.35 equiv) was added dropwise to a cooled solution (−40 °C) of diisopropylamine (1.65 mL, 1.15 g, 11.4 mmol, 1.45 equiv) in THF (1.6 mL). The resulting solution was stirred for 10 minutes at −40 °C and for 20 minutes at room temperature.

Alcoholate preparation 1:

Benzyl alcohol (1.15 mL, 1.19 g, 11.0 mmol, 1.4 equiv) was added dropwise to a solution of sodium hydride (60 wt% in mineral oil, 409 mg, 10.2 mmol, 1.3 equiv) in a THF/DMSO mixture (5.0 mL THF, 15.3 mL DMSO) and the resulting mixture was stirred at room temperature for 3 hours.

<sup>3</sup> B. Wang, C. Lu, S. Zhang, G. He, W. A. Nack, G. Chen, *Org. Lett.* 2014, **16**, 6260–6263.

### Alcoholate preparation 2:

Benzyl alcohol (716  $\mu\text{L}$ , 745 mg, 6.89 mmol, 0.88 equiv) was added dropwise to a solution of sodium hydride (60 wt% in mineral oil, 236 mg, 5.90 mmol, 0.75 equiv) in a THF/DMSO mixture (2.9 mL THF, 8.8 mL DMSO) and the resulting mixture was stirred at room temperature for 2 hours.

### Matteson homologation:

Boronic ester **8** was prepared according to a modified literature procedure.<sup>4</sup>

The freshly prepared LDA solution was added dropwise at  $-40\text{ }^\circ\text{C}$  to a solution of boronic ester **8** (4.00 g, 7.87 mmol, 1.0 equiv) and DCM (1.65 mL, 2.17 g, 25.6 mmol, 3.25 equiv) in THF (12.0 mL) and the resulting mixture was stirred for 10 minutes at  $-40\text{ }^\circ\text{C}$ . Subsequently, zinc chloride (3.22 g, 23.6 mmol, 3.0 equiv) in THF (14.2 mL) was added slowly to the solution which was thereafter stirred at room temperature for 3 hours. The chloroboronic ester solution was cooled to  $0\text{ }^\circ\text{C}$  and treated with the previously synthesized alcoholate solution 1. The reaction mixture was stirred at room temperature for 16 hours, which led to uncomplete conversion. The solution was cooled to  $0\text{ }^\circ\text{C}$  and treated with alcoholate solution 2. The reaction mixture was stirred at room temperature for 16 hours and was thereafter hydrolyzed with  $\text{NH}_4\text{Cl}$  solution (saturated). The mixture was extracted twice with PE and the combined organics were dried over  $\text{Na}_2\text{SO}_4$ . After solvent removal, the crude product was purified by flash chromatography ( $\text{SiO}_2$ , PE  $\rightarrow$  PE:EtOAc 98:2  $\rightarrow$  95:5) to afford boronic ester **9** (3.80 g, 6.04 mmol, 77 %) as a colorless resin.  $R_f$  (**9**) = 0.39 ( $\text{SiO}_2$ , PE:EtOAc 80:20);  $[\alpha]_D^{20} = +23.9$  [ $c = 1.0$ ,  $\text{CHCl}_3$ ].

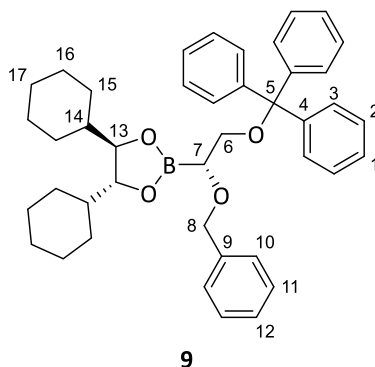

**$^1\text{H-NMR}$  (400 MHz,  $\text{CDCl}_3$ ):**  $\delta = 0.90 - 1.25$  (m, 10 H, 15- $\text{H}_{\text{ax}}$ , 15- $\text{H}_{\text{ax}}'$ , 16- $\text{H}_{\text{eq}}$ , 16- $\text{H}_{\text{eq}}'$ , 17- $\text{H}_{\text{eq}}$ ), 1.34 (m, 2 H, 14-H), 1.53 – 1.80 (m, 10 H, 15- $\text{H}_{\text{eq}}$ , 15- $\text{H}_{\text{eq}}'$ , 16- $\text{H}_{\text{ax}}$ , 16- $\text{H}_{\text{ax}}'$ , 17- $\text{H}_{\text{ax}}$ ), 3.33 (dd,  $^2J_{6a,6b} = 9.9$  Hz,  $^3J_{6a,7} = 5.5$  Hz, 1 H, 6- $\text{H}_a$ ), 3.39 (d,  $^2J_{6b,6a} = 9.9$  Hz,  $^3J_{6b,7} = 3.8$  Hz, 1 H, 6- $\text{H}_b$ ), 3.54 (dd,  $^3J_{6a,7} = 5.5$  Hz,  $^3J_{6b,7} = 3.8$  Hz, 1 H, 7-H), 3.91 (m, 2 H, 13-H), 4.56 (d,  $^2J_{8a,8b} = 12.2$  Hz, 1 H, 8- $\text{H}_a$ ), 4.66 (d,  $^2J_{8b,8a} = 12.2$  Hz, 1 H, 8- $\text{H}_b$ ), 7.18 – 7.35 (m, 14 H, 1-H, 3-H, 10-H, 11-H, 12-H), 7.49 (m, 6 H, 2-H).  **$^{13}\text{C-NMR}$  (100 MHz,  $\text{CDCl}_3$ ):**  $\delta = 25.9$  (t, C-16), 26.0 (t, C-17), 26.4 (t, C-16'), 27.4 (t, C-15), 28.2 (t, C-15'), 42.8 (d, C-14), 64.5 (t, C-6), 67.5 (d, C-7), 72.3 (t, C-8), 83.8 (d, C-13), 86.4 (s, C-5), 126.7 (d, C-1), 127.2 (d, C-12), 127.6 (d, C-3), 127.7 (d, C-10), 128.1 (d, C-11), 128.8 (d, C-2), 139.1 (s, C-9), 144.2 (s, C-4).

**HRMS (CI)** calculated for  $\text{C}_{23}\text{H}_{34}\text{BO}_4$  [ $\text{M-Trityl}$ ] $^+$ : 385.2545, found: 385.2560.

### (2*S*,3*S*)-2-(Benzyloxy)-7-[(*tert*-butyldiphenylsilyl)oxy]-1-(trityloxy)heptan-3-ol (**11**)

#### LDA preparation:

*n*-Butyllithium (1.6 M in hexanes, 12.6 mL, 20.2 mmol, 1.35 equiv) was added dropwise to a cooled solution ( $-40\text{ }^\circ\text{C}$ ) of diisopropylamine (3.10 mL, 2.19 g, 21.7 mmol, 1.45 equiv) in THF (3.0 mL). The resulting solution was stirred for 10 minutes at  $-40\text{ }^\circ\text{C}$  and for 20 minutes at room temperature.

<sup>4</sup> O. Ho, R. Soundararajan, J. Lu, D. Matteson, Z. Wang, X. Chen, M. Wei and R. Willett, *Organometallics* **1995**, *14*, 2855–2860.

### Grignard preparation:

Chloride **10** was prepared according to a modified literature procedure.<sup>5</sup>

1,2-Dibromoethane (258  $\mu$ L, 561 mg, 2.99 mmol, 20 mol%) was added to a suspension of magnesium (1.49 g, 61.3 mmol, 4.1 equiv) in THF (5.90 mL), which was thereafter heated repeatedly with a heat gun until the solvent started boiling. Subsequently, chloride **10** (7.78 g, 22.4 mmol, 1.5 equiv) in THF (16.2 mL) was added dropwise at 35  $^{\circ}$ C to the solution before it was refluxed for 2 hours.

### Matteson homologation:

The freshly prepared LDA solution was added dropwise at  $-40^{\circ}$ C to a solution of boronic ester **9** (9.39 g, 14.9 mmol, 1.0 equiv) and DCM (2.90 mL, 3.81 g, 44.8 mmol, 3.0 equiv) in THF (21 mL) and the resulting mixture was stirred for 10 minutes at  $-40^{\circ}$ C. Subsequently, zinc chloride (8.14 g, 59.8 mmol, 4.0 equiv) in THF (36 mL) was added slowly to the solution which was thereafter stirred at room temperature for 2.5 hours. The chloroboronic ester solution was diluted with *n*-pentane and hydrolyzed with  $\text{NH}_4\text{Cl}$  solution (saturated). After phase separation, the aqueous phase was extracted three times with PE and the combined organic phases were dried over  $\text{Na}_2\text{SO}_4$ . After solvent removal, the crude  $\alpha$ -chloroboronic ester was dissolved in THF (60 mL) and cooled to 0  $^{\circ}$ C. At this temperature the previously prepared Grignard solution was added dropwise and the reaction mixture was warmed to room temperature over 16 hours. After hydrolyzation with  $\text{NH}_4\text{Cl}$  solution (saturated), the mixture was extracted three times with PE and the combined organics were dried over  $\text{Na}_2\text{SO}_4$ . After solvent removal, the crude boronic ester was used in the next step without further purification.

### Oxidation:

Hydrogen peroxide (30 wt% in water, 3.4 mL, 33.6 mmol, 2.25 equiv) and NaOH (1 M, 34 mL, 34.0 mmol, 2.25 equiv) were added at 0  $^{\circ}$ C to a solution of the previously synthesized boronic ester in THF (75 mL) and the resulting mixture was stirred at room temperature for 90 minutes. Remaining peroxide was reduced with a  $\text{Na}_2\text{SO}_3$  solution (1 M) and the aqueous phase was extracted three times with diethyl ether. The combined organics were dried over  $\text{Na}_2\text{SO}_4$  and the solvent was removed in vacuo. The crude product was purified by flash chromatography ( $\text{SiO}_2$ , PE:EtOAc 90:10  $\rightarrow$  85:15) to afford alcohol **11** (7.53 g, 10.2 mmol, 69 % over 3 steps) as a colorless resin.  $R_f$  (**11**) = 0.35 ( $\text{SiO}_2$ , PE:EtOAc 80:20);  $[\alpha]_D^{20} = +7.1$  [ $c = 0.5$ ,  $\text{CHCl}_3$ ].

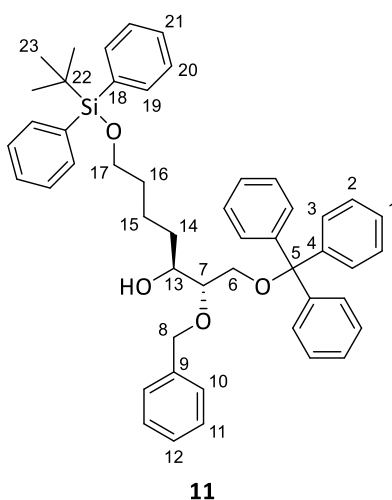

**$^1\text{H-NMR}$  (500 MHz,  $\text{CDCl}_3$ ):**  $\delta = 1.03$  (s, 9 H, 23-H), 1.24 – 1.37 (m, 3 H, 14-H, 15- $\text{H}_a$ ), 1.41 – 1.55 (m, 3 H, 15- $\text{H}_b$ , 16-H), 2.39 (d,  $^3J_{\text{OH},13} = 5.4$  Hz, 1 H, O-H), 3.24 (dd,  $^2J_{6a,6b} = 9.8$  Hz,  $^3J_{6a,7} = 4.7$  Hz, 1 H, 6- $\text{H}_a$ ), 3.35 (ddd,  $^3J_{7,6a} = 4.7$  Hz,  $^3J_{7,13} = 4.4$  Hz,  $^3J_{7,6b} = 4.1$  Hz, 1 H, 7-H), 3.38 (dd,  $^2J_{6b,6a} = 9.8$  Hz,  $^3J_{6b,7} = 4.1$  Hz, 1 H, 6- $\text{H}_b$ ), 3.61 (t,  $^3J_{17,16} = 6.5$  Hz, 2 H, 17-H), 3.67 (m, 1 H, 13-H), 4.46 (d,  $^2J_{8a,8b} = 11.4$  Hz, 1 H, 8- $\text{H}_a$ ), 4.76 (d,

<sup>5</sup> I. Erdelmeier, G. Bülow, C. W. Woo, J. Decker, G. Raabe, H. J. Gais, *Chem. - A Eur. J.* **2019**, *25*, 8371–8386.

$^2J_{8b,8a} = 11.4$  Hz, 1 H, 8-H<sub>b</sub>), 7.20 – 7.42 (m, 20 H, 1-H, 3-H, 10-H, 11-H, 12-H, 20-H, 21-H), 7.46 (m, 6 H, 2-H), 7.65 (m, 4 H, 19-H).  $^{13}\text{C-NMR}$  (125 MHz,  $\text{CDCl}_3$ ):  $\delta = 19.2$  (s, C-22), 21.9 (t, C-15), 26.9 (q, C-23), 32.6 (t, C-14), 32.9 (t, C-16), 63.4 (t, C-6), 63.9 (t, C-17), 71.6 (d, C-13), 72.9 (t, C-8), 80.9 (d, C-7), 86.9 (s, C-5), 127.1 (d, C-1), 127.6 (d, C-20), 127.8 (d, C-12), 127.9 (d, C-3), 128.0 (d, C-10), 128.4 (d, C-11), 128.6 (d, C-2), 129.5 (d, C-21), 134.1 (s, C-18), 135.5 (d, C-19), 138.2 (s, C-9), 143.8 (s, C-4).

**HRMS (CI)** calculated for  $\text{C}_{30}\text{H}_{37}\text{O}_4\text{Si}$  [ $\text{M-Trityl-2H}$ ] $^+$ : 489.2456, found: 489.2466.

### (2*S*,3*S*)-2-(Benzyloxy)-7-[(*tert*-butyldiphenylsilyloxy)heptan-1,3-diol (**12**)

A solution of alcohol **11** (7.53 g, 10.2 mmol, 1.0 equiv) in DCM (28.5 mL) was added at 0 °C to zinc bromide (dried with a heat gun, 9.22 g, 41.0 mmol, 4.0 equiv) and the resulting suspension was stirred at room temperature for 2.5 hours. Subsequently, 738  $\mu\text{L}$  water (738  $\mu\text{L}$ , 738 mg, 41.0 mmol, 4.0 equiv) was added and the resulting solution was stirred at room temperature for 50 minutes. The reaction mixture was hydrolyzed with  $\text{NaHCO}_3$  solution (saturated), extracted three times with ethyl acetate and the combined organic phases were dried over  $\text{Na}_2\text{SO}_4$ . After solvent removal, the crude product was purified by flash chromatography ( $\text{SiO}_2$ , PE:EtOAc 80:20  $\rightarrow$  60:40) to afford diol **12** (4.03 g, 8.18 mmol, 80 %) as a colorless resin.  $R_f$  (**12**) = 0.19 ( $\text{SiO}_2$ , PE:EtOAc 60:40);  $[\alpha]_D^{20} = +3.2$  [ $c = 1.0$ ,  $\text{CHCl}_3$ ].

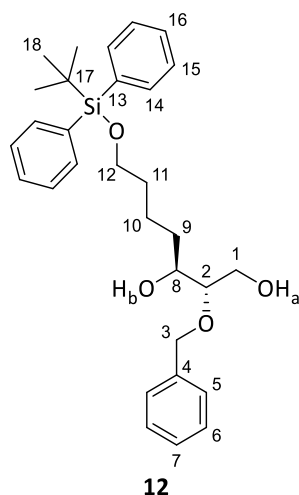

$^1\text{H-NMR}$  (500 MHz,  $\text{CDCl}_3$ ):  $\delta = 1.04$  (s, 9 H, 18-H), 1.37 (m, 1 H, 10-H<sub>a</sub>), 1.46 – 1.62 (m, 5 H, 9-H, 10-H<sub>b</sub>, 11-H), 2.21 (bs, 1 H, O-H<sub>a</sub>), 2.33 (bs, 1 H, O-H<sub>b</sub>), 3.34 (ddd,  $^3J_{2,1a} = ^3J_{2,8} = 4.4$  Hz,  $^3J_{2,1b} = 4.1$  Hz, 1 H, 2-H), 3.65 (t,  $^3J_{17,16} = 6.3$  Hz, 2 H, 12-H), 3.66 – 3.72 (m, 2 H, 1-H<sub>a</sub>, 8-H), 3.86 (dd,  $^2J_{1b,1a} = 11.7$  Hz,  $^3J_{1b,2} = 2.8$  Hz, 1-H<sub>b</sub>), 4.59 (d,  $^2J_{3a,3b} = 11.4$  Hz, 1 H, 3-H<sub>a</sub>), 4.71 (d,  $^2J_{3b,3a} = 11.4$  Hz, 1 H, 3-H<sub>b</sub>), 7.27 – 7.43 (m, 11 H, 5-H, 6-H, 7-H, 15-H, 16-H), 7.66 (m, 4 H, 14-H).  $^{13}\text{C-NMR}$  (125 MHz,  $\text{CDCl}_3$ ):  $\delta = 19.2$  (s, C-17), 21.9 (t, C-10), 26.8 (q, C-18), 32.4 (t, C-9), 33.2 (t, C-11), 61.9 (t, C-1), 63.8 (t, C-12), 72.1 (d, C-8), 72.7 (t, C-3), 81.1 (d, C-2), 127.6 (d, C-15), 127.9 (d, C-5), 128.0 (d, C-7), 128.5 (d, C-6), 129.5 (d, C-16), 134.0 (s, C-13), 135.5 (d, C-14), 137.9 (s, C-4).

**HRMS (CI)** calculated for  $\text{C}_{30}\text{H}_{41}\text{O}_4\text{Si}$  [ $\text{M+H}$ ] $^+$ : 493.2769, found: 493.2769.

### *tert*-Butyldiphenyl{[(5*S*,6*S*)-5,6,7-tris(benzyloxy)heptyl]oxy}silane (**13**)

*t*-BuOK (758 mg, 6.76 mmol, 3.0 equiv) and benzyl bromide (1.05 mL, 1.54 g, 9.01 mmol, 4.0 equiv) were added successively to a solution of diol **12** (1.11 g, 2.25 mmol, 1.0 equiv) in THF (22.5 mL). The reaction mixture was stirred at 0 °C for 100 minutes and thereafter hydrolyzed with  $\text{NH}_4\text{Cl}$  solution (saturated). The mixture was extracted three times with diethyl ether and the combined organics were dried over  $\text{Na}_2\text{SO}_4$ . After solvent removal, the crude product was purified by flash chromatography ( $\text{SiO}_2$ , cyclohexane:EtOAc 100:0  $\rightarrow$  90:10) to afford compound **13** (1.35 g, 2.00 mmol, 89 %) as a colorless oil.  $R_f$  (**13**) = 0.26 ( $\text{SiO}_2$ , PE:EtOAc 90:10);  $[\alpha]_D^{20} = +0.7$  [ $c = 1.0$ ,  $\text{CHCl}_3$ ].



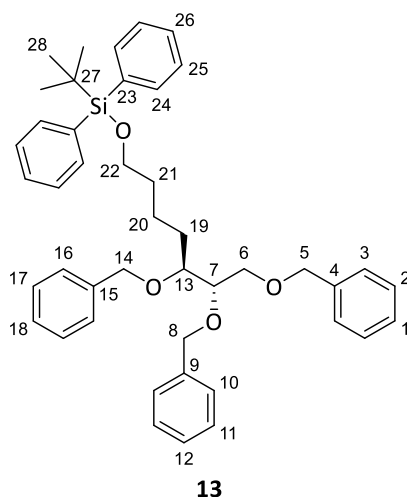

**<sup>1</sup>H-NMR (400 MHz, CDCl<sub>3</sub>):**  $\delta$  = 1.04 (s, 9 H, 28-H), 1.24 (m, 1 H, 20-H<sub>a</sub>), 1.37 – 1.65 (m, 5 H, 19-H, 20-H<sub>b</sub>, 21-H), 3.50 (dt, <sup>3</sup>J<sub>13,7</sub> = 8.2 Hz, <sup>3</sup>J<sub>13,19</sub> = 4.3 Hz, 1 H, 13-H), 3.57 – 3.63 (m, 3 H, 6-H<sub>a</sub>, 22-H), 3.68 – 3.73 (m, 2 H, 6-H<sub>b</sub>, 7-H), 4.49 (d, <sup>2</sup>J<sub>14a,14b</sub> = 11.5 Hz, 1 H, 14-H<sub>a</sub>), 4.50 (s, 2 H, 5-H), 4.56 (d, <sup>2</sup>J<sub>14b,14a</sub> = 11.5 Hz, 1 H, 14-H<sub>b</sub>), 4.61 (d, <sup>2</sup>J<sub>8a,8b</sub> = 11.9 Hz, 1 H, 8-H<sub>a</sub>), 4.75 (d, <sup>2</sup>J<sub>8b,8a</sub> = 11.9 Hz, 1 H, 8-H<sub>b</sub>), 7.21 – 7.43 (m, 21 H, 1-H, 2-H, 3-H, 10-H, 11-H, 12-H, 16-H, 17-H, 18-H, 25-H, 26-H), 7.66 (m, 4 H, 24-H). **<sup>13</sup>C-NMR (100 MHz, CDCl<sub>3</sub>):**  $\delta$  = 19.2 (s, C-27), 22.3 (t, C-20), 26.9 (q, C-28), 29.9 (t, C-19), 32.6 (t, C-21), 63.8 (t, C-22), 70.5 (t, C-6), 72.8 (t, C-14), 72.9 (t, C-8), 73.4 (t, C-5), 79.1 (d, C-13), 79.2 (d, C-7), 127.5, 127.5, 127.5 (3d, C-1, C-12, C-18), 127.6 (d, C-25), 127.6, 128.0, 128.0 (3d, C-3, C-10, C-16), 128.2, 128.3, 128.3 (3d, C-2, C-11, C-17), 129.5 (d, C-26), 134.1 (s, C-23), 135.5 (d, C-24), 138.3 (s, C-4), 138.6 (s, C-15), 138.8 (s, C-9).

**HRMS (CI)** calculated for C<sub>44</sub>H<sub>53</sub>O<sub>4</sub>Si [M+H]<sup>+</sup>: 673.3708, found: 673.3731.

#### (5S,6S)-5,6,7-Tris(benzyloxy)heptan-1-ol (**14**)

A TBAF solution (1 M in THF, 2.50 mL, 2.50 mmol, 1.25 equiv) was added slowly at 0 °C to a solution of compound **13** (1.34 g, 1.99 mmol, 1.0 equiv) in THF (13.3 mL) and the reaction mixture was stirred at room temperature for 16 hours. Subsequently, the solution was hydrolyzed with NH<sub>4</sub>Cl solution (saturated) and thereafter extracted three times with ethyl acetate. The combined organic phases were dried over Na<sub>2</sub>SO<sub>4</sub> and the solvent was removed under reduced pressure. After flash chromatography (SiO<sub>2</sub>, cyclohexane:EtOAc 100:0 → 60:40) alcohol **14** (827 mg, 1.90 mmol, 96 %) was obtained as a colorless oil. **R<sub>f</sub>** (**14**) = 0.22 (SiO<sub>2</sub>, PE:EtOAc 60:40); [ $\alpha$ ]<sub>D</sub><sup>20</sup> = – 3.9 [c = 1.0, CHCl<sub>3</sub>].

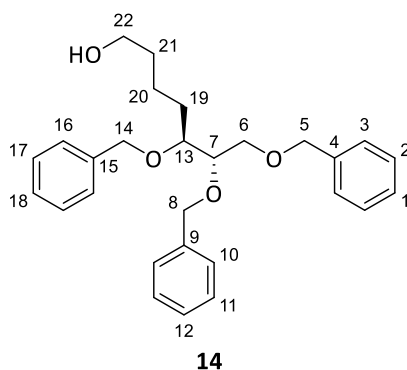

**<sup>1</sup>H-NMR (400 MHz, CDCl<sub>3</sub>):**  $\delta$  = 1.22 (m, 1 H, 20-H<sub>a</sub>), 1.34 – 1.50 (m, 5 H, 19-H<sub>a</sub>, 20-H<sub>b</sub>, 21-H, O-H), 1.60 (m, 1 H, 19-H<sub>b</sub>), 3.49 – 3.56 (m, 3 H, 13-H, 22-H), 3.62 (dd, <sup>2</sup>J<sub>6a,6b</sub> = 11.0 Hz, <sup>3</sup>J<sub>6a,7</sub> = 7.2 Hz, 1 H, 6-H<sub>a</sub>), 3.69 – 3.74 (m, 2 H, 6-H<sub>b</sub>, 7-H), 4.50 (d, <sup>2</sup>J<sub>14a,14b</sub> = 11.8 Hz, 1 H, 14-H<sub>a</sub>), 4.51 (s, 2 H, 5-H), 4.58 (d, <sup>2</sup>J<sub>14b,14a</sub> = 11.8 Hz, 1 H, 14-H<sub>b</sub>), 4.61 (d, <sup>2</sup>J<sub>8a,8b</sub> = 11.9 Hz, 1 H, 8-H<sub>a</sub>), 4.76 (d, <sup>2</sup>J<sub>8b,8a</sub> = 11.9 Hz, 1 H, 8-H<sub>b</sub>), 7.23 – 7.36 (m, 15 H, 1-H, 2-H, 3-H, 10-H, 11-H, 12-H, 16-H, 17-H, 18-H). **<sup>13</sup>C-NMR (100 MHz, CDCl<sub>3</sub>):**  $\delta$  = 22.0 (t, C-20), 29.8 (t, C-19), 32.6 (t, C-21), 62.7 (t, C-22), 70.4 (t, C-6), 72.7 (t, C-14), 72.9 (t, C-8), 73.4 (t, C-5),

79.0 (d, C-13), 79.0 (d, C-7), 127.5, 127.5, 127.6 (3d, C-1, C-12, C-18), 127.6, 128.0, 128.0 (3d, C-3, C-10, C-16), 128.2, 128.3, 128.3 (3d, C-2, C-11, C-17), 138.3 (s, C-4), 138.6 (s, C-15), 138.7 (s, C-9).

**HRMS (CI)** calculated for  $C_{28}H_{35}O_4$   $[M+H]^+$ : 435.2530, found: 435.2531.

### {[(2S,3S)-7-Iodoheptane-1,2,3-triyl]tris(oxy)}tris(methylene)tribenzene (15)

Triphenylphosphine (2.33 g, 8.88 mmol, 1.25 equiv) and imidazole (604 mg, 8.88 mmol, 1.25 equiv) were dissolved in DCM (32 mL) and the resulting solution was cooled to 0 °C. Iodine (2.24 g, 8.84 mmol, 1.24 equiv) was added and the mixture was stirred at room temperature for 20 minutes. A solution of alcohol **14** (3.10 g, 7.13 mmol, 1.0 equiv) in DCM (16 mL) was added dropwise at 0 °C and the reaction mixture was stirred for 25 minutes at 0 °C followed by 3 hours at room temperature. Subsequently, the mixture was washed with  $Na_2SO_3$  solution (1 M) and the aqueous phase thereafter extracted twice with diethyl ether. The combined organic phases were dried over  $Na_2SO_4$  and the solvent was removed in vacuo. After flash chromatography ( $SiO_2$ , cyclohexane:EtOAc 100:0 → 80:20) iodide **15** (3.64 g, 6.69 mmol, 94 %) was obtained as a colorless oil.  $R_f$  (**15**) = 0.30 ( $SiO_2$ , PE:EtOAc 90:10);  $[\alpha]_D^{20} = -1.3$  [c = 1.0,  $CHCl_3$ ].

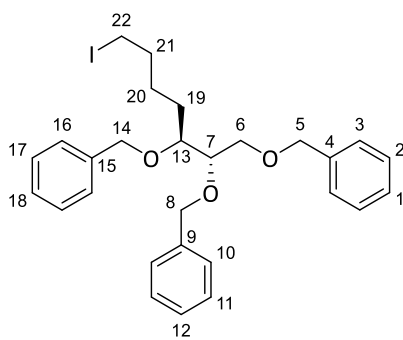

**15**

**$^1H$ -NMR (400 MHz,  $CDCl_3$ ):**  $\delta$  = 1.24 (m, 1 H, 20- $H_a$ ), 1.37 – 1.50 (m, 2 H, 19- $H_a$ , 20- $H_b$ ), 1.57 (m, 1 H, 19- $H_b$ ), 1.71 (m, 2 H, 21-H), 3.08 (t,  $^3J_{22,21} = 7.1$  Hz, 2 H, 22-H), 3.50 (dt,  $^3J_{13,7} = 8.1$  Hz,  $^3J_{13,19} = 4.4$  Hz, 1 H, 13-H), 3.61 (dd,  $^2J_{6a,6b} = 10.9$  Hz,  $^3J_{6a,7} = 7.1$  Hz, 1 H, 6- $H_a$ ), 3.68 – 3.73 (m, 2 H, 6- $H_b$ , 7-H), 4.49 (d,  $^2J_{14a,14b} = 11.6$  Hz, 1 H, 14- $H_a$ ), 4.51 (s, 2 H, 5-H), 4.59 (d,  $^2J_{14b,14a} = 11.6$  Hz, 1 H, 14- $H_b$ ), 4.62 (d,  $^2J_{8a,8b} = 12.0$  Hz, 1 H, 8- $H_a$ ), 4.77 (d,  $^2J_{8b,8a} = 12.0$  Hz, 1 H, 8- $H_b$ ), 7.24 – 7.39 (m, 15 H, 1-H, 2-H, 3-H, 10-H, 11-H, 12-H, 16-H, 17-H, 18-H).  **$^{13}C$ -NMR (100 MHz,  $CDCl_3$ ):**  $\delta$  = 6.9 (t, C-22), 26.9 (t, C-20), 29.0 (t, C-19), 34.4 (t, C-21), 70.3 (t, C-6), 72.8 (t, C-14), 72.9 (t, C-8), 73.4 (t, C-5), 78.7 (d, C-13), 78.9 (d, C-7), 127.6, 127.6, 127.6 (3d, C-1, C-12, C-18), 127.7, 128.0, 128.1 (3d, C-3, C-10, C-16), 128.3, 128.3, 128.4 (3d, C-2, C-11, C-17), 138.2 (s, C-4), 138.5 (s, C-15), 138.7 (s, C-9).

**HRMS (CI)** calculated for  $C_{28}H_{34}IO_3$   $[M+H]^+$ : 435.2530, found: 435.2531.

### (2S,8S,9S)-8,9,10-Tris(benzyloxy)-2-(1,3-dioxoisindolin-2-yl)-N-(quinolin-8-yl)decanamide (16)

Silver carbonate (31.2 mg, 113  $\mu$ mol, 80 mol%), palladium acetate (3.2 mg, 14.0  $\mu$ mol, 10 mol%) and dibenzyl phosphate (11.8 mg, 42.0  $\mu$ mol, 30 mol%) were added successively to a solution of iodide **15** (100 mg, 184  $\mu$ mol, 1.3 equiv) and alanine derivative **6** (48.8 mg, 141  $\mu$ mol, 1.0 equiv) in *tert*-amyl alcohol/1,2-dichloroethane mixture (1:1, 1.06 mL) and the resulting suspension was stirred in a sealed tube at 60 °C for 22 hours. Subsequently, the brown suspension was concentrated in vacuo and the crude product purified by flash chromatography ( $SiO_2$ , cyclohexane:EtOAc 100:0 → 70:30) to afford compound **16** (83.1 mg, 109  $\mu$ mol, 77 %) as a colorless resin.  $R_f$  (**16**) = 0.34 ( $SiO_2$ , PE:EtOAc 60:40);  $[\alpha]_D^{20} = -2.9$  [c = 0.5,  $CHCl_3$ ].

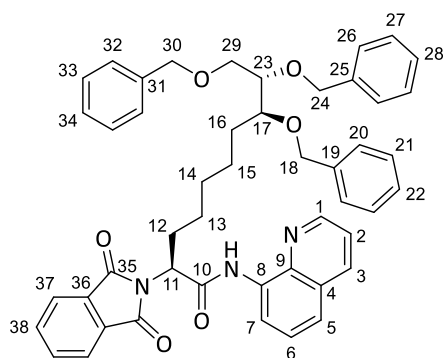

16

**<sup>1</sup>H-NMR (400 MHz, CDCl<sub>3</sub>):**  $\delta$  = 1.15 (m, 1 H, 15-H<sub>a</sub>), 1.25 – 1.46 (m, 6 H, 13-H, 14-H, 15-H<sub>b</sub>, 16-H<sub>a</sub>), 1.55 (m, 1 H, 16-H<sub>b</sub>), 2.33 (m, 1 H, 12-H<sub>a</sub>), 2.55 (m, 1 H, 12-H<sub>b</sub>), 3.48 (dt, <sup>3</sup>J<sub>17,23</sub> = 8.0 Hz, <sup>3</sup>J<sub>17,16</sub> = 4.4 Hz, 1 H, 17-H), 3.60 (dd, <sup>2</sup>J<sub>29a,29b</sub> = 11.0 Hz, <sup>3</sup>J<sub>29a,23</sub> = 7.3 Hz, 1 H, 29-H<sub>a</sub>), 3.66 – 3.72 (m, 2 H, 23-H, 29-H<sub>b</sub>), 4.48 (d, <sup>2</sup>J<sub>18a,18b</sub> = 11.6 Hz, 1 H, 18-H<sub>a</sub>), 4.49 (s, 2 H, 30-H), 4.55 (d, <sup>2</sup>J<sub>18b,18a</sub> = 11.6 Hz, 1 H, 18-H<sub>b</sub>), 4.60 (d, <sup>2</sup>J<sub>24a,24b</sub> = 12.0 Hz, 1 H, 24-H<sub>a</sub>), 4.74 (d, <sup>2</sup>J<sub>24b,24a</sub> = 12.0 Hz, 1 H, 24-H<sub>b</sub>), 5.10 (dd, <sup>3</sup>J<sub>11,12b</sub> = 11.0 Hz, <sup>3</sup>J<sub>11,12a</sub> = 5.3 Hz, 1 H, 11-H), 7.20 – 7.35 (m, 15 H, 20-H, 21-H, 22-H, 26-H, 27-H, 28-H, 32-H, 33-H, 34-H), 7.40 (dd, <sup>3</sup>J<sub>2,3</sub> = 8.3 Hz, <sup>3</sup>J<sub>2,1</sub> = 4.3 Hz, 1 H, 2-H), 7.48 – 7.54 (m, 2 H, 5-H, 6-H), 7.75 (m, 2 H, 38-H), 7.90 (m, 2 H, 37-H), 8.13 (dd, <sup>3</sup>J<sub>3,2</sub> = 8.3 Hz, <sup>4</sup>J<sub>3,1</sub> = 1.6 Hz, 1 H, 3-H), 8.69 (dd, <sup>3</sup>J<sub>1,2</sub> = 4.3 Hz, <sup>4</sup>J<sub>1,3</sub> = 1.6 Hz, 1 H, 1-H), 8.72 (m, 1 H, 7-H), 10.33 (s, 1 H, N-H). **<sup>13</sup>C-NMR (100 MHz, CDCl<sub>3</sub>):**  $\delta$  = 25.7 (t, C-15), 26.6 (t, C-13), 28.7 (t, C-12), 29.1 (t, C-14), 29.9 (t, C-16), 55.2 (d, C-11), 70.4 (t, C-29), 72.7 (t, C-18), 72.9 (t, C-24), 73.3 (t, C-30), 78.9 (d, C-17), 78.9 (d, C-23), 116.7 (d, C-7), 121.6 (d, C-2), 121.9 (d, C-5), 123.6 (d, C-37), 127.3 (d, C-6), 127.5, 127.6, 128.0, 128.0, 128.2, 128.3 (9d, C-20, C-21, C-22, C-26, C-27, C-28, C-32, C-33, C-34), 127.8 (s, C-4), 131.8 (s, C-36), 133.9 (s, C-8), 134.2 (d, C-38), 136.2 (d, C-3), 138.3 (s, C-31), 138.5 (s, C-9), 138.6 (s, C-19), 138.7 (s, C-25), 148.3 (d, C-1), 167.0 (s, C-10), 168.1 (s, C-35).

**HRMS (CI)** calculated for C<sub>48</sub>H<sub>48</sub>N<sub>3</sub>O<sub>6</sub> [M+H]<sup>+</sup>: 762.3538, found: 762.3579.

### (2*S*,8*S*,9*S*)-2-Azido-8,9,10-tris(benzyloxy)-*N*-(quinolin-8-yl)decanamide (17)

DIPEA (312  $\mu$ L, 231 mg, 1.79 mmol, 1.0 equiv) and hydrazine hydrate (105  $\mu$ L, 107 mg, 2.15 mmol, 1.2 equiv) were added successively to a solution of compound **16** (1.36 g, 1.79 mmol, 1.0 equiv) in ethanol (12.3 mL) and the resulting mixture was stirred at 80 °C for 20 hours. Subsequently, the reaction mixture was concentrated and the crude product purified by flash chromatography (SiO<sub>2</sub>, cyclohexane:EtOAc 100:0  $\rightarrow$  50:50) to afford the free amine (1.06 g, 1.68 mmol, 94 %) as a colorless resin. **R<sub>f</sub>** = 0.15 (SiO<sub>2</sub>, PE:EtOAc 50:50); [ $\alpha$ ]<sub>D</sub><sup>20</sup> = + 3.6 [c = 1.0, CHCl<sub>3</sub>].

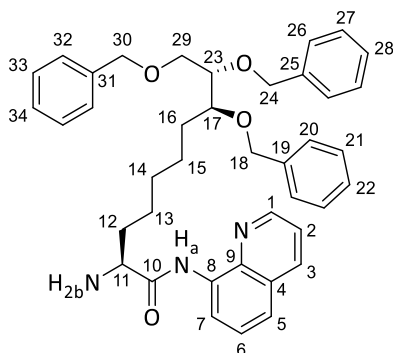

**<sup>1</sup>H-NMR (400 MHz, CDCl<sub>3</sub>):**  $\delta$  = 1.19 (m, 1 H, 15-H<sub>a</sub>), 1.27 (m, 2 H, 14-H), 1.32 – 1.46 (m, 4 H, 13-H, 15-H<sub>b</sub>, 16-H<sub>a</sub>), 1.56 (m, 1 H, 16-H<sub>b</sub>), 1.66 (m, 1 H, 12-H<sub>a</sub>), 1.69 (bs, 2 H, N-H<sub>b</sub>), 1.95 (m, 1 H, 12-H<sub>b</sub>), 3.49 (dt, <sup>3</sup>J<sub>17,23</sub> = 8.1 Hz, <sup>3</sup>J<sub>17,16</sub> = 4.3 Hz, 1 H, 17-H), 3.57 – 3.64 (m, 2 H, 11-H, 29-H<sub>a</sub>), 3.67 – 3.73 (m, 2 H, 23-H, 29-H<sub>b</sub>), 4.48 (d, <sup>2</sup>J<sub>18a,18b</sub> = 11.6 Hz, 1 H, 18-H<sub>a</sub>), 4.50 (s, 2 H, 30-H), 4.56 (d, <sup>2</sup>J<sub>18b,18a</sub> = 11.6 Hz, 1 H, 18-H<sub>b</sub>), 4.61 (d, <sup>2</sup>J<sub>24a,24b</sub> = 11.9 Hz, 1 H, 24-H<sub>a</sub>), 4.75 (d, <sup>2</sup>J<sub>24b,24a</sub> = 11.9 Hz, 1 H, 24-H<sub>b</sub>), 7.21 – 7.36 (m, 15 H,

20-H, 21-H, 22-H, 26-H, 27-H, 28-H, 32-H, 33-H, 34-H), 7.44 (dd,  $^3J_{2,3} = 8.2$  Hz,  $^3J_{2,1} = 4.2$  Hz, 1 H, 2-H), 7.49 – 7.57 (m, 2 H, 5-H, 6-H), 8.15 (dd,  $^3J_{3,2} = 8.3$  Hz,  $^4J_{3,1} = 1.7$  Hz, 1 H, 3-H), 8.85 (dd,  $^3J_{7,6} = 7.3$  Hz,  $^3J_{7,5} = 1.7$  Hz, 1 H, 7-H), 8.87 (dd,  $^3J_{1,2} = 4.2$  Hz,  $^4J_{1,3} = 1.7$  Hz, 1 H, 1-H), 11.38 (s, 1 H, N-H<sub>a</sub>). **<sup>13</sup>C-NMR (100 MHz, CDCl<sub>3</sub>):**  $\delta = 25.8$  (t, C-15), 25.8 (t, C-13), 29.4 (t, C-14), 30.0 (t, C-16), 35.2 (t, C-12), 56.5 (d, C-11), 70.4 (t, C-29), 72.7 (t, C-18), 72.9 (t, C-24), 73.3 (t, C-30), 79.0 (d, C-17), 79.0 (d, C-23), 116.4 (d, C-7), 121.5 (d, C-2), 121.6 (d, C-5), 127.3 (d, C-6), 127.5, 127.5, 127.6, 128.0, 128.0, 128.2, 128.3 (9d, C-20, C-21, C-22, C-26, C-27, C-28, C-32, C-33, C-34), 128.1 (s, C-4), 134.4 (s, C-8), 136.2 (d, C-3), 138.3 (s, C-31), 138.6 (s, C-19), 138.7 (s, C-25), 139.0 (s, C-9), 148.5 (d, C-1), 174.1 (s, C-10).

**HRMS (CI)** calculated for C<sub>40</sub>H<sub>46</sub>N<sub>3</sub>O<sub>4</sub> [M+H]<sup>+</sup>: 632.3483, found: 632.3502.

#### Preparation of triflyl azide:

Toluene (1.0 mL) was added to a solution of sodium azide (404 mg, 6.21 mmol, 1.6 equiv) in water (1.0 mL) and the biphasic mixture was cooled to 0 °C. Subsequently, Tf<sub>2</sub>O (660  $\mu$ L, 1.10 g, 3.91 mmol, 1.0 equiv) was added dropwise and the mixture was stirred for 30 minutes at 0 °C and for 2 hours at 10 °C. NaHCO<sub>3</sub> solution (saturated) was added to the triflyl azide mixture until the gas evolution was over followed by phase separation. The aqueous phase was extracted twice with toluene (2x 1 mL) and the organic phases were combined to yield the triflyl azide solution (ca. 1.3 M in toluene).

#### Diazotransfer reaction:

NaHCO<sub>3</sub> (182 mg, 2.17 mmol, 4.0 equiv), copper sulfate pentahydrate (5.8 mg, 23.0  $\mu$ mol, 4.3 mol%), triflyl azide solution (1.30 mL, 1.66 mmol, 3.1 equiv) and methanol (4.7 mL) were added successively to a mixture of the free amine (339 mg, 537  $\mu$ mol, 1.0 equiv) in water (637  $\mu$ L) and the reaction mixture was stirred at room temperature for 2 hours. After solvent removal, the crude product was purified by flash chromatography (SiO<sub>2</sub>, cyclohexane:EtOAc 100:0  $\rightarrow$  70:30, then C18, H<sub>2</sub>O:MeCN 100:0  $\rightarrow$  0:100) to afford azide **17** (338 mg, 513  $\mu$ mol, 96 %) as a colorless resin. **R<sub>f</sub> (17)** = 0.20 (SiO<sub>2</sub>, PE:EtOAc 80:20); **[\alpha]<sub>D</sub><sup>20</sup>** = – 20.3 [c = 1.0, CHCl<sub>3</sub>].

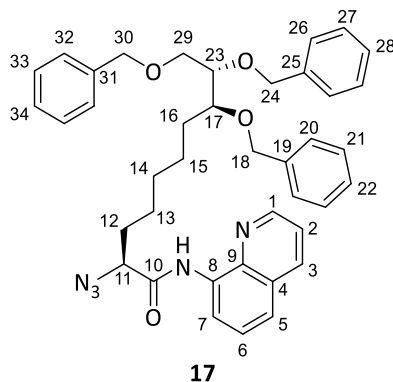

**<sup>1</sup>H-NMR (400 MHz, CDCl<sub>3</sub>):**  $\delta = 1.16$  (m, 1 H, 15-H<sub>a</sub>), 1.27 (m, 2 H, 14-H), 1.33 – 1.51 (m, 4 H, 13-H, 15-H<sub>b</sub>, 16-H<sub>a</sub>), 1.56 (m, 1 H, 16-H<sub>b</sub>), 1.99 (m, 2 H, 12-H), 3.48 (dt,  $^3J_{17,23} = 8.1$  Hz,  $^3J_{17,16} = 4.4$  Hz, 1 H, 17-H), 3.60 (dd,  $^2J_{29a,29b} = 10.9$  Hz,  $^3J_{29a,23} = 7.1$  Hz, 1 H, 29-H<sub>a</sub>), 3.67 – 3.72 (m, 2 H, 23-H, 29-H<sub>b</sub>), 4.19 (dd,  $^3J_{11,12a} = 7.2$  Hz,  $^3J_{11,12b} = 4.9$  Hz, 1 H, 11-H), 4.48 (d,  $^2J_{18a,18b} = 11.5$  Hz, 1 H, 18-H<sub>a</sub>), 4.50 (s, 2 H, 30-H), 4.56 (d,  $^2J_{18b,18a} = 11.5$  Hz, 1 H, 18-H<sub>b</sub>), 4.60 (d,  $^2J_{24a,24b} = 11.9$  Hz, 1 H, 24-H<sub>a</sub>), 4.75 (d,  $^2J_{24b,24a} = 11.9$  Hz, 1 H, 24-H<sub>b</sub>), 7.21 – 7.36 (m, 15 H, 20-H, 21-H, 22-H, 26-H, 27-H, 28-H, 32-H, 33-H, 34-H), 7.47 (dd,  $^3J_{2,3} = 8.2$  Hz,  $^3J_{2,1} = 4.2$  Hz, 1 H, 2-H), 7.52 – 7.57 (m, 2 H, 5-H, 6-H), 8.17 (dd,  $^3J_{3,2} = 8.2$  Hz,  $^4J_{3,1} = 1.6$  Hz, 1 H, 3-H), 8.78 (m, 1 H, 7-H), 8.87 (dd,  $^3J_{1,2} = 4.2$  Hz,  $^4J_{1,3} = 1.6$  Hz, 1 H, 1-H), 10.61 (s, 1 H, N-H). **<sup>13</sup>C-NMR (100 MHz, CDCl<sub>3</sub>):**  $\delta = 25.4$  (t, C-13), 25.7 (t, C-15), 29.3 (t, C-14), 29.9 (t, C-16), 32.4 (t, C-12), 65.1 (d, C-11), 70.4 (t, C-29), 72.7 (t, C-18), 72.9 (t, C-24), 73.3 (t, C-30), 78.9 (d, C-17), 78.9 (d, C-23), 116.7 (d, C-7), 121.7 (d, C-2), 122.3 (d, C-5), 127.2 (d, C-6), 127.5, 127.6, 128.0, 128.0, 128.2, 128.3 (9d, C-20, C-21, C-22, C-26, C-27, C-28, C-32, C-33, C-34), 128.0 (s, C-4), 133.7 (s, C-8), 136.3 (d, C-3), 138.3 (s, C-31), 138.6 (s, C-19), 138.7 (s, C-9), 138.7 (s, C-25), 148.6 (d, C-1), 168.0 (s, C-10).

**HRMS (CI)** calculated for C<sub>40</sub>H<sub>43</sub>N<sub>5</sub>O<sub>4</sub> [M]<sup>+</sup>: 657.3310, found: 657.3314.

## Methyl (2S,8S,9S)-2-azido-8,9,10-tris(benzyloxy)decanoate (**18**)

### Boc-activation of the amide:

4-Dimethylaminopyridine (105 mg, 859  $\mu\text{mol}$ , 64 mol%) and  $\text{Boc}_2\text{O}$  (1.18 g, 5.41 mmol, 4.0 equiv) were added successively to a solution of azide **17** (889 mg, 1.35 mmol, 1.0 equiv) in acetonitrile (13.5 mL) and the red colored reaction mixture was stirred at room temperature for 16 hours. After solvent removal, the crude product was purified by flash chromatography ( $\text{SiO}_2$ , cyclohexane:EtOAc 100:0  $\rightarrow$  70:30) to afford the Boc-protected derivative as a colorless resin.

### Aminoquinoline-cleavage:

Lithium hydroxide monohydrate (114 mg, 2.70 mmol, 2.0 equiv) in water (6.8 mL) and hydrogen peroxide (30 wt% in water, 678  $\mu\text{L}$ , 6.76 mmol, 5.0 equiv) were added dropwise at 0  $^\circ\text{C}$  to a solution of the previously synthesized Boc-protected derivative in THF (13.5 mL) and the reaction mixture was stirred at 0 $^\circ\text{C}$  for 60 minutes. The remaining peroxide was reduced with  $\text{Na}_2\text{SO}_3$  solution (1 M) and the mixture was acidified with aqueous HCl (1 M). After threefold extraction with ethyl acetate, the combined organic phases were dried over  $\text{Na}_2\text{SO}_4$ . After solvent removal, the crude product was purified by flash chromatography ( $\text{SiO}_2$ , cyclohexane:EtOAc+1 % HOAc 100:0  $\rightarrow$  0:100) to afford the carboxylic acid (678 mg, 1.28 mmol, 94 % over 2 steps) as a yellow resin.  $R_f = 0.27$  ( $\text{SiO}_2$ , PE:EtOAc:HOAc 70:30:1);  $[\alpha]_D^{20} = -5.6$  [ $c = 1.0$ ,  $\text{CHCl}_3$ ].

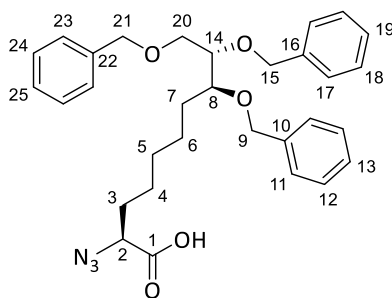

**$^1\text{H-NMR}$  (400 MHz,  $\text{CDCl}_3$ ):**  $\delta = 1.08 - 1.25$  (m, 3 H, 5-H, 6- $\text{H}_a$ ), 1.28 – 1.46 (m, 4 H, 4-H, 6- $\text{H}_b$ , 7- $\text{H}_a$ ), 1.56 (m, 1 H, 7- $\text{H}_b$ ), 1.74 (m, 2 H, 3-H), 3.50 (dt,  $^3J_{8,14} = 8.1$  Hz,  $^3J_{8,7} = 4.3$  Hz, 1 H, 8-H), 3.62 (dd,  $^2J_{20a,20b} = 10.8$  Hz,  $^3J_{20a,14} = 7.1$  Hz, 1 H, 20- $\text{H}_a$ ), 3.68 – 3.74 (m, 2 H, 14-H, 20- $\text{H}_b$ ), 3.80 (dd,  $^3J_{2,3a} = 8.3$  Hz,  $^3J_{2,3b} = 5.0$  Hz, 1 H, 2-H), 4.49 (d,  $^2J_{9a,9b} = 11.8$  Hz, 1 H, 9- $\text{H}_a$ ), 4.51 (s, 2 H, 21-H), 4.58 (d,  $^2J_{9b,9a} = 11.8$  Hz, 1 H, 9- $\text{H}_b$ ), 4.61 (d,  $^2J_{15a,15b} = 12.0$  Hz, 1 H, 15- $\text{H}_a$ ), 4.76 (d,  $^2J_{15b,15a} = 12.0$  Hz, 1 H, 15- $\text{H}_b$ ), 7.23 – 7.35 (m, 15 H, 11-H, 12H, 13-H, 17-H, 18-H, 19-H, 23-H, 24-H, 25-H), 9.02 (bs, 1 H, COO-H).  **$^{13}\text{C-NMR}$  (100 MHz,  $\text{CDCl}_3$ ):**  $\delta = 25.5$  (t, C-6), 25.6 (t, C-4), 28.9 (t, C-5), 29.8 (t, C-7), 31.1 (t, C-3), 61.7 (d, C-2), 70.2 (t, C-20), 72.7 (t, C-9), 72.8 (t, C-15), 73.3 (t, C-21), 78.8 (d, C-8), 78.9 (d, C-14), 127.6, 127.6, 127.6, 127.7, 128.0, 128.1, 128.3, 128.3 (9d, C-11, C-12, C-13, C-17, C-18, C-19, C-23, C-24, C-25), 138.1 (s, C-22), 138.4 (s, C-10), 138.5 (s, C-16), 175.6 (s, C-1).

**HRMS (CI)** calculated for  $\text{C}_{31}\text{H}_{38}\text{N}_3\text{O}_5$   $[\text{M}+\text{H}]^+$ : 532.2806, found: 532.2818.

Potassium carbonate (255 mg, 1.85 mmol, 2.5 equiv) and methyl iodide (139  $\mu\text{L}$ , 315 mg, 2.22 mmol, 3.0 equiv) were added at 0  $^\circ\text{C}$  to a solution of the carboxylic acid (393 mg, 739  $\mu\text{mol}$ , 1.0 equiv) in DMF (7.4 mL) and the reaction mixture was warmed to room temperature over 3 hours. Subsequently, the solution was hydrolyzed with water and thereafter extracted three times with ethyl acetate. The combined organics were dried over  $\text{Na}_2\text{SO}_4$  and the solvent was removed under reduced pressure. After flash chromatography ( $\text{SiO}_2$ , cyclohexane:EtOAc 100:0  $\rightarrow$  80:20) methyl ester **18** (364 mg, 667  $\mu\text{mol}$ , 90 %) was obtained as a colorless oil.  $R_f$  (**18**) = 0.39 ( $\text{SiO}_2$ , PE:EtOAc 80:20);  $[\alpha]_D^{20} = -8.0$  [ $c = 0.5$ ,  $\text{CHCl}_3$ ].

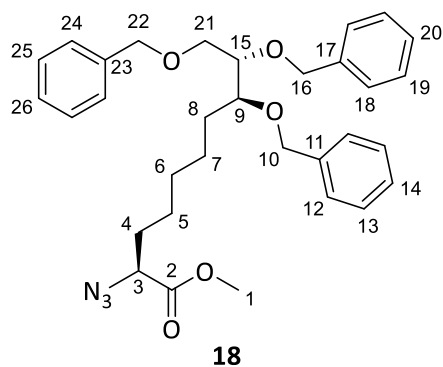

**<sup>1</sup>H-NMR (400 MHz, CDCl<sub>3</sub>):**  $\delta$  = 1.10 – 1.27 (m, 3 H, 6-H, 7-H<sub>a</sub>), 1.28 – 1.46 (m, 4 H, 5-H, 7-H<sub>b</sub>, 8-H<sub>a</sub>), 1.56 (m, 1 H, 8-H<sub>b</sub>), 1.73 (m, 2 H, 4-H), 3.50 (dt, <sup>3</sup>J<sub>9,15</sub> = 8.2 Hz, <sup>3</sup>J<sub>9,8</sub> = 4.3 Hz, 1 H, 9-H), 3.62 (dd, <sup>2</sup>J<sub>21a,21b</sub> = 10.9 Hz, <sup>3</sup>J<sub>21a,15</sub> = 7.2 Hz, 1 H, 21-H<sub>a</sub>), 3.68 – 3.74 (m, 2 H, 15-H, 21-H<sub>b</sub>), 3.75 – 3.80 (m, 4 H, 1-H, 3-H), 4.49 (d, <sup>2</sup>J<sub>10a,10b</sub> = 11.6 Hz, 1 H, 10-H<sub>a</sub>), 4.51 (s, 2 H, 22-H), 4.58 (d, <sup>2</sup>J<sub>10b,10a</sub> = 11.6 Hz, 1 H, 10-H<sub>b</sub>), 4.62 (d, <sup>2</sup>J<sub>16a,16b</sub> = 12.0 Hz, 1 H, 16-H<sub>a</sub>), 4.76 (d, <sup>2</sup>J<sub>16b,16a</sub> = 12.0 Hz, 1 H, 16-H<sub>b</sub>), 7.24 – 7.37 (m, 15 H, 12-H, 13-H, 14-H, 18-H, 19-H, 20-H, 24-H, 25-H, 26-H). **<sup>13</sup>C-NMR (100 MHz, CDCl<sub>3</sub>):**  $\delta$  = 25.6 (t, C-7), 25.6 (t, C-5), 29.0 (t, C-6), 29.9 (t, C-8), 31.2 (t, C-4), 52.5 (q, C-1), 61.9 (d, C-3), 70.4 (t, C-21), 72.7 (t, C-10), 72.9 (t, C-16), 73.4 (t, C-22), 78.9 (d, C-9), 78.9 (d, C-15), 127.5, 127.5, 127.6, 127.6, 128.0, 128.0, 128.2, 128.3, 128.3 (9d, C-12, C-13, C-14, C-18, C-19, C-20, C-24, C-25, C-26), 138.3 (s, C-23), 138.6 (s, C-11), 138.7 (s, C-17), 171.1 (s, C-2).

**HRMS (CI)** calculated for C<sub>32</sub>H<sub>40</sub>NO<sub>5</sub> [M-N<sub>2</sub>+H]<sup>+</sup>: 518.2901, found: 518.2910.

***tert*-Butyl (S)-2-[[[(2S,8S,9S)-8,9,10-tris(benzyloxy)-1-methoxy-1-oxodecan-2-yl]carbamoyl]-piperidine-1-carboxylate (19)**

Staudinger-Reduction:

Triphenylphosphine (338 mg, 1.29 mmol, 3.0 equiv) and water (166  $\mu$ L) were added to a solution of azide **18** (235 mg, 430  $\mu$ mol, 1.0 equiv) in THF (4.1 mL) and the resulting solution was stirred at 50 °C for 3 hours. After solvent removal, the crude product was purified by flash chromatography (SiO<sub>2</sub>, cyclohexane:EtOAc 100:0  $\rightarrow$  0:100, then C18, H<sub>2</sub>O:MeCN 100:0  $\rightarrow$  0:100) to afford the free amine (210 mg, 404  $\mu$ mol, 94 %) as a colorless resin.

Peptide coupling:

TBTU (143 mg, 444  $\mu$ mol, 1.1 equiv) and DIPEA (85.0  $\mu$ L, 62.6 mg, 484  $\mu$ mol, 1.2 equiv) were added to a mixture of the previously synthesized amine (210 mg, 404  $\mu$ mol, 1.0 equiv) and Boc-L-pipecolic acid (102 mg, 444  $\mu$ mol, 1.1 equiv) in acetonitrile (4.0 mL) at 0 °C. The reaction mixture was warmed to room temperature over 16 hours before ethyl acetate was added. The mixture was washed with aqueous HCl solution (1 M) and the aqueous phase was extracted three times with ethyl acetate. The combined organics were washed with NaHCO<sub>3</sub> solution (saturated), dried over Na<sub>2</sub>SO<sub>4</sub> and the solvent was removed in vacuo. After flash chromatography (SiO<sub>2</sub>, cyclohexane:EtOAc 100:0  $\rightarrow$  75:25), dipeptide **19** (271 mg, 371  $\mu$ mol, 92 % over 2 steps) was obtained as a colorless resin. **R<sub>f</sub> (19)** = 0.28 (SiO<sub>2</sub>, PE:EtOAc 70:30); [ $\alpha$ ]<sub>D</sub><sup>20</sup> = – 31.3 [c = 0.5, CHCl<sub>3</sub>].

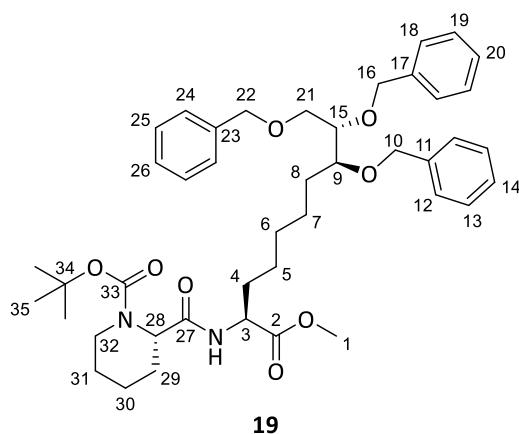

Major rotamer:

**<sup>1</sup>H-NMR (400 MHz, CDCl<sub>3</sub>):**  $\delta$  = 1.10 – 1.30 (m, 5 H, 5-H<sub>a</sub>, 6-H, 7-H), 1.30 – 1.45 (m, 3 H, 5-H<sub>b</sub>, 8-H<sub>a</sub>, 31-H<sub>a</sub>), 1.48 (s, 9 H, 35-H), 1.50 – 1.66 (m, 6 H, 4-H<sub>a</sub>, 8-H<sub>b</sub>, 29-H<sub>a</sub>, 30-H, 31-H<sub>b</sub>), 1.78 (m, 1 H, 4-H<sub>b</sub>), 2.27 (m, 1 H, 29-H<sub>b</sub>), 2.75 (m, 1 H, 32-H<sub>a</sub>), 3.49 (dt, <sup>3</sup>J<sub>9,15</sub> = 8.2 Hz, <sup>3</sup>J<sub>9,8</sub> = 4.4 Hz, 1 H, 9-H), 3.61 (dd, <sup>2</sup>J<sub>21a,21b</sub> = 10.8 Hz, <sup>3</sup>J<sub>21a,15</sub> = 7.2 Hz, 1 H, 21-H<sub>a</sub>), 3.68 – 3.72 (m, 2 H, 15-H, 21-H<sub>b</sub>), 3.72 (s, 3 H, 1-H), 3.99 (m, 1 H, 32-H<sub>b</sub>), 4.49 (d, <sup>2</sup>J<sub>10a,10b</sub> = 11.6 Hz, 1 H, 10-H<sub>a</sub>), 4.51 (s, 2 H, 22-H), 4.56 (m, 1 H, 3-H), 4.57 (d, <sup>2</sup>J<sub>10b,10a</sub> = 11.6 Hz, 1 H, 10-H<sub>b</sub>), 4.61 (d, <sup>2</sup>J<sub>16a,16b</sub> = 12.0 Hz, 1 H, 16-H<sub>a</sub>), 4.74 (m, 1 H, 28-H), 4.75 (d, <sup>2</sup>J<sub>16b,16a</sub> = 12.0 Hz, 1 H, 16-H<sub>b</sub>), 6.62 (m, 1 H, N-H), 7.24 – 7.36 (m, 15 H, 12-H, 13-H, 14-H, 18-H, 19-H, 20-H, 24-H, 25-H, 26-H). **<sup>13</sup>C-NMR (100 MHz, CDCl<sub>3</sub>):**  $\delta$  = 20.5 (t, C-30), 24.8 (t, C-31), 25.3 (t, C-7), 25.4 (t, C-29), 25.7 (t, C-5), 28.3 (q, C-35), 29.2 (t, C-6), 30.0 (t, C-8), 32.5 (t, C-4), 42.2 (t, C-32), 52.0 (d, C-3), 52.2 (q, C-1), 53.7 (d, C-28), 70.4 (t, C-21), 72.7 (t, C-10), 72.9 (t, C-16), 73.3 (t, C-22), 79.0 (d, C-9), 79.0 (d, C-15), 80.6 (s, C-34), 127.5, 127.5, 127.6, 127.9, 128.0, 128.2, 128.3 (9d, C-12, C-13, C-14, C-18, C-19, C-20, C-24, C-25, C-26), 138.3 (s, C-23), 138.6 (s, C-11), 138.7 (s, C-17), 170.9 (s, C-27), 172.6 (s, C-2).

The signal of C-33 is located in the noise.

Minor rotamer (selected signals):

**<sup>1</sup>H-NMR (400 MHz, CDCl<sub>3</sub>):**  $\delta$  = 4.15 (m, 1 H, 32-H<sub>b</sub>), 6.43 (m, 1 H, N-H). **<sup>13</sup>C-NMR (100 MHz, CDCl<sub>3</sub>):**  $\delta$  = 41.3 (t, C-32), 55.4 (d, C-28).

**HRMS (CI)** calculated for C<sub>38</sub>H<sub>51</sub>N<sub>2</sub>O<sub>6</sub> [M-*t*BuOCO+2H]<sup>+</sup>: 631.3742, found: 631.3755.

**Methyl (2*S*,8*S*,9*S*)-8,9,10-tris(benzyloxy)-2-[(*S*)-1-[(*tert*-butoxycarbonyl)-L-leucyl]piperidine-2-carboxamido]decanoate (20)**

Boc-cleavage:

Dipeptide **19** (265 mg, 363  $\mu$ mol, 1.0 equiv) was dissolved in HCl solution (4 M in 1,4-dioxane, 908  $\mu$ L, 3.63 mmol, 10.0 equiv) and the solution was stirred at room temperature for 60 minutes. The crude product was used in the next step without further purification.

Peptide coupling:

PyAOP (227 mg, 435  $\mu$ mol, 1.2 equiv) and DIPEA (158  $\mu$ L, 117 mg, 907  $\mu$ mol, 2.5 eq) were added to a mixture of the previously synthesized amine hydrochloride and Boc-L-leucine (227 mg, 435  $\mu$ mol, 1.2 equiv) in DMF (3.65 mL) at 0 °C. The reaction mixture was warmed to room temperature over 16 hours before ethyl acetate was added. The mixture was washed with NaHCO<sub>3</sub> solution (saturated), dried over Na<sub>2</sub>SO<sub>4</sub> and the solvent was removed in vacuo. After flash chromatography (C18, H<sub>2</sub>O:MeCN 100:0  $\rightarrow$  0:100), tripeptide **20** (286 mg, 339  $\mu$ mol, 93 % over 2 steps) was obtained as a colorless resin. **R<sub>f</sub> (20)** = 0.34 (SiO<sub>2</sub>, PE:EtOAc 60:40); [ $\alpha$ ]<sub>D</sub><sup>20</sup> = -43.8 [c = 0.5, CHCl<sub>3</sub>].

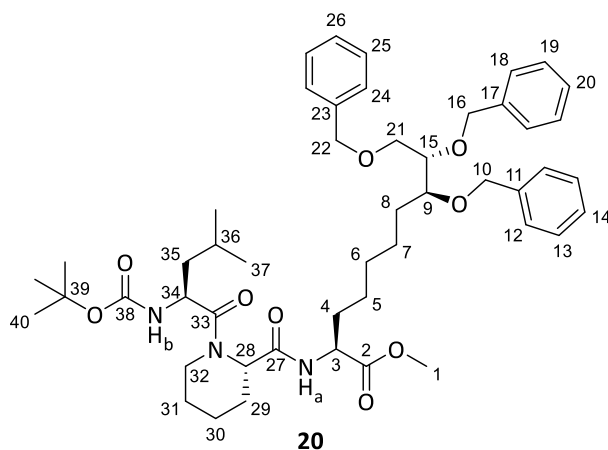

#### Major rotamer:

**<sup>1</sup>H-NMR (400 MHz, CDCl<sub>3</sub>):** δ = 0.91 (d, <sup>3</sup>J<sub>37,36</sub> = 6.6 Hz, 3 H, 37-H), 0.99 (d, <sup>3</sup>J<sub>37,36</sub> = 6.5 Hz, 3 H, 37-H'), 1.10 – 1.28 (m, 5 H, 5-H<sub>a</sub>, 6-H, 7-H), 1.28 – 1.45 (m, 5 H, 5-H<sub>b</sub>, 8-H<sub>a</sub>, 31-H<sub>a</sub>, 35-H), 1.44 (s, 9 H, 40-H), 1.50 – 1.65 (m, 3 H, 4-H<sub>a</sub>, 8-H<sub>b</sub>, 31-H<sub>b</sub>), 1.65 – 1.80 (m, 5 H, 4-H<sub>b</sub>, 29-H<sub>a</sub>, 30-H, 36-H), 2.21 (m, 1 H, 29-H<sub>b</sub>), 3.14 (ddd, <sup>2</sup>J<sub>32a,32b</sub> = <sup>3</sup>J<sub>32a,31b</sub> = 12.4 Hz, <sup>3</sup>J<sub>32a,31a</sub> = 1.6 Hz, 1 H, 32-H<sub>a</sub>), 3.49 (dt, <sup>3</sup>J<sub>9,15</sub> = 8.2 Hz, <sup>3</sup>J<sub>9,8</sub> = 4.2 Hz, 1 H, 9-H), 3.61 (dd, <sup>2</sup>J<sub>21a,21b</sub> = 10.9 Hz, <sup>3</sup>J<sub>21a,15</sub> = 7.2 Hz, 1 H, 21-H<sub>a</sub>), 3.67 – 3.72 (m, 2 H, 15-H, 21-H<sub>b</sub>), 3.72 (s, 3 H, 1-H), 3.82 (m, 1 H, 32-H<sub>b</sub>), 4.48 (m, 1 H, 3-H), 4.48 (d, <sup>2</sup>J<sub>10a,10b</sub> = 11.6 Hz, 1 H, 10-H<sub>a</sub>), 4.51 (s, 2 H, 22-H), 4.57 (d, <sup>2</sup>J<sub>10b,10a</sub> = 11.6 Hz, 1 H, 10-H<sub>b</sub>), 4.61 (d, <sup>2</sup>J<sub>16a,16b</sub> = 12.0 Hz, 1 H, 16-H<sub>a</sub>), 4.73 (m, 1 H, 34-H), 4.75 (d, <sup>2</sup>J<sub>16b,16a</sub> = 12.0 Hz, 1 H, 16-H<sub>b</sub>), 5.21 (m, 1 H, 28-H), 5.29 (d, <sup>3</sup>J<sub>NHb,34</sub> = 9.1 Hz, 1 H, N-H<sub>b</sub>), 6.34 (d, <sup>3</sup>J<sub>NHa,3</sub> = 7.7 Hz, 1 H, N-H<sub>a</sub>), 7.24 – 7.36 (m, 15 H, 12-H, 13-H, 14-H, 18-H, 19-H, 20-H, 24-H, 25-H, 26-H). **<sup>13</sup>C-NMR (100 MHz, CDCl<sub>3</sub>):** δ = 20.2 (t, C-30), 21.6 (q, C-37'), 23.4 (q, C-37), 24.6 (d, C-36), 25.3 (t, C-31), 25.3 (t, C-7), 25.5 (t, C-29), 25.7 (t, C-5), 28.3 (q, C-40), 29.3 (t, C-6), 30.0 (t, C-8), 32.3 (t, C-4), 42.4 (t, C-35), 43.6 (t, C-32), 48.7 (d, C-34), 52.0 (d, C-28), 52.1 (d, C-3), 52.3 (q, C-1), 70.4 (t, C-21), 72.7 (d, C-10), 72.9 (t, C-16), 73.4 (t, C-22), 79.0 (d, C-9), 79.0 (d, C-15), 79.6 (s, C-39), 127.5, 127.6, 127.6, 127.9, 128.0, 128.2, 128.3, 128.3 (9d, C-12, C-13, C-14, C-18, C-19, C-20, C-24, C-25, C-26), 138.3 (s, C-23), 138.6 (s, C-11), 138.7 (s, C-17), 155.5 (s, C-38), 170.4 (s, C-27), 171.9 (s, C-33), 172.6 (s, C-2).

#### Minor rotamer (selected signals):

**<sup>1</sup>H-NMR (400 MHz, CDCl<sub>3</sub>):** δ = 0.96 (d, <sup>3</sup>J<sub>37,36</sub> = 6.6 Hz, 3 H, 37-H), 0.96 (d, <sup>3</sup>J<sub>37,36</sub> = 6.5 Hz, 3 H, 37-H'), 1.38 (s, 9 H, 40-H), 1.85 (m, 1 H, 4-H<sub>b</sub>), 2.46 (ddd, <sup>2</sup>J<sub>32a,32b</sub> = <sup>3</sup>J<sub>32a,31b</sub> = 13.0 Hz, <sup>3</sup>J<sub>32a,31a</sub> = 1.8 Hz, 1 H, 32-H<sub>a</sub>), 2.55 (m, 1 H, 29-H<sub>b</sub>), 3.69 (s, 3 H, 1-H), 4.38 – 4.45 (m, 2 H, 3-H, 34-H), 4.51 (m, 1 H, 28-H), 4.62 (m, 1 H, 32-H<sub>b</sub>), 4.98 (d, <sup>3</sup>J<sub>NHb,34</sub> = 7.3 Hz, 1 H, N-H<sub>b</sub>), 7.97 (d, <sup>3</sup>J<sub>NHa,3</sub> = 7.6 Hz, 1 H, N-H<sub>a</sub>). **<sup>13</sup>C-NMR (100 MHz, CDCl<sub>3</sub>):** δ = 20.7 (t, C-30), 23.4 (q, C-37), 24.7 (d, C-36), 25.8 (t, C-5), 26.1 (t, C-29), 26.1 (t, C-7), 28.2 (q, C-40), 29.2 (t, C-6), 30.1 (t, C-8), 30.7 (t, C-4), 40.0 (t, C-32), 40.8 (t, C-35), 49.2 (d, C-34), 53.2 (d, C-3), 56.2 (d, C-28), 70.5 (t, C-21), 79.0 (d, C-9), 79.1 (d, C-15), 80.3 (s, C-39), 138.3 (s, C-23), 138.6 (s, C-11), 155.6 (s, C-38), 169.8 (s, C-27), 172.7 (s, C-2), 173.2 (s, C-33).

**HRMS (ESI)** calculated for C<sub>49</sub>H<sub>70</sub>N<sub>3</sub>O<sub>9</sub> [M+H]<sup>+</sup>: 844.5107, found: 844.5119.

#### Methyl (2S,8S,9S)-8,9,10-tris(benzyloxy)-2-[(S)-1-[(tert-butoxycarbonyl)-D-phenylalanyl-L-leucyl]piperidine-2-carboxamido]decanoate (21)

##### Boc-cleavage:

Tripeptide **20** (274 mg, 324 μmol, 1.0 equiv) was dissolved in DCM (1.4 mL) and thereafter treated at 0 °C with a TFA:triisopropylsilane:water mixture (92.5:5:2.5, 1.4 mL). The resulting solution was stirred at 0 °C for 60 minutes before the solvent was removed under reduced pressure and the crude product was used in the next step without further purification.



### Peptide coupling:

PyAOP (186 mg, 356  $\mu\text{mol}$ , 1.1 equiv) and DIPEA (141  $\mu\text{L}$ , 105 mg, 810  $\mu\text{mol}$ , 2.5 equiv) were added to a mixture of the previously synthesized TFA salt and Boc-D-phenylalanine (101 mg, 356  $\mu\text{mol}$ , 1.1 equiv) in DMF (3.24 mL) at 0  $^{\circ}\text{C}$ . The reaction mixture was warmed to room temperature over 16 hours before ethyl acetate was added. The mixture was washed with aqueous HCl solution (1 M) and the aqueous phase was extracted three times with ethyl acetate. The combined organics were washed with  $\text{NaHCO}_3$  solution (saturated), dried over  $\text{Na}_2\text{SO}_4$  and the solvent was removed in vacuo. After flash chromatography ( $\text{SiO}_2$ , cyclohexane:EtOAc 100:0  $\rightarrow$  60:40), tetrapeptide **21** (276 mg, 278  $\mu\text{mol}$ , 86 % over 2 steps) was obtained as a colorless resin.  $R_f$  (**21**) = 0.39 ( $\text{SiO}_2$ , PE:EtOAc 50:50);  $[\alpha]_D^{20} = -37.9$  [ $c = 1.0$ ,  $\text{CHCl}_3$ ].

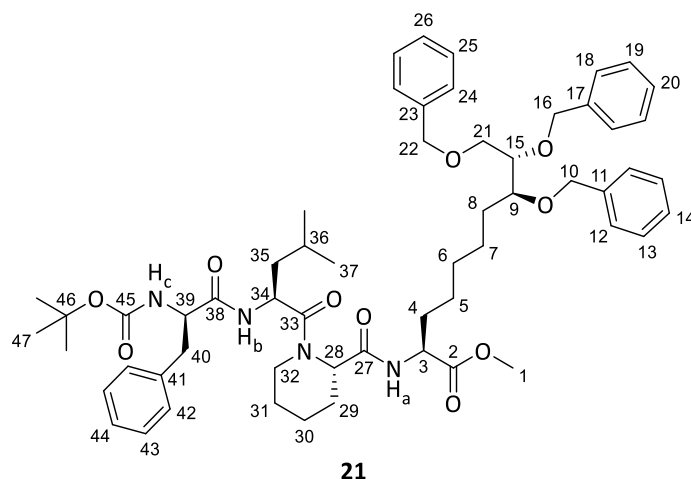

### Major rotamer:

$^1\text{H-NMR}$  (500 MHz,  $\text{DMSO-d}_6$ , 373 K):  $\delta = 0.85$  (d,  $^3J_{37,36} = 6.4$  Hz, 3 H, 37-H), 0.86 (d,  $^3J_{37',36} = 6.3$  Hz, 3 H, 37'-H), 1.20 – 1.67 (m, 17 H, 4-H, 5-H, 6-H, 7-H, 8-H, 29-H<sub>a</sub>, 30-H, 31-H, 35-H), 1.32 (s, 9 H, 47-H), 1.71 (m, 1 H, 36-H), 2.16 (m, 1 H, 29-H<sub>b</sub>), 2.80 (dd,  $^2J_{40a,40b} = 13.9$  Hz,  $^3J_{40a,39} = 9.2$  Hz, 1 H, 40-H<sub>a</sub>), 2.99 (m, 1 H, 40-H<sub>b</sub>), 3.33 (m, 1 H, 32-H<sub>a</sub>), 3.55 (dt,  $^3J_{9,15} = 7.8$  Hz,  $^3J_{9,8} = 4.4$  Hz, 1 H, 9-H), 3.62 (dd,  $^2J_{21a,21b} = 10.2$  Hz,  $^3J_{21a,15} = 6.0$  Hz, 1 H, 21-H<sub>a</sub>), 3.63 (s, 3 H, 1-H), 3.68 – 3.75 (m, 2 H, 15-H, 21-H<sub>b</sub>), 3.88 (m, 1 H, 32-H<sub>b</sub>), 4.23 – 4.29 (m, 2 H, 34-H, 39-H), 4.50 (d,  $^2J_{10a,10b} = 11.8$  Hz, 1 H, 10-H<sub>a</sub>), 4.51 (s, 2 H, 22-H), 4.55 (d,  $^2J_{10b,10a} = 11.8$  Hz, 1 H, 10-H<sub>b</sub>), 4.59 (d,  $^2J_{16a,16b} = 11.9$  Hz, 1 H, 16-H<sub>a</sub>), 4.69 (d,  $^2J_{16b,16a} = 11.9$  Hz, 1 H, 16-H<sub>b</sub>), 4.81 (m, 1 H, 3-H), 5.04 (m, 1 H, 28-H), 6.35 (m, 1 H, N-H<sub>c</sub>), 7.15 – 7.65 (m, 20 H, 12-H, 13-H, 14-H, 18-H, 19-H, 20-H, 24-H, 25-H, 26-H, 42-H, 43-H, 44-H), 7.56 (m, 1 H, N-H<sub>b</sub>), 7.75 (d,  $^3J_{\text{NH}_a,3} = 7.9$  Hz, 1 H, N-H<sub>a</sub>).  $^{13}\text{C-NMR}$  (100 MHz,  $\text{CDCl}_3$ ):  $\delta = 20.1$  (t, C-30), 21.7 (q, C-37'), 23.3 (q, C-37), 24.3 (d, C-36), 25.4 (t, C-31), 25.7 (t, C-7), 26.3 (t, C-5), 28.2 (q, C-47), 29.2 (t, C-29), 29.3 (t, C-4), 30.0 (t, C-6), 32.1 (t, C-8), 39.2 (t, C-40), 42.0 (t, C-35), 43.7 (t, C-32), 48.2 (d, C-34), 52.0 (d, C-39), 52.2 (d, C-3), 52.2 (q, C-1), 56.5 (d, C-28), 70.4 (t, C-21), 72.7 (t, C-10), 72.9 (t, C-16), 73.4 (t, C-22), 79.0 (d, C-15), 79.0 (d, C-9), 80.0 (s, C-46), 126.8, 127.5, 127.6, 127.6, 127.9, 127.9, 127.8, 128.2, 128.3, 128.6, 128.7, 129.2 (12d, C-12, C-13, C-14, C-18, C-19, C-20, C-24, C-25, C-26, C-42, C-43, C-44), 136.5 (s, C-41), 138.3 (s, C-23), 138.6 (s, C-11), 138.7 (s, C-17), 155.1 (s, C-45), 169.6 (s, C-38), 170.7 (s, C-27), 172.3 (s, C-33), 172.8 (s, C-2).

### Minor rotamer (selected signals):

$^{13}\text{C-NMR}$  (100 MHz,  $\text{CDCl}_3$ ):  $\delta = 20.6$  (t, C-30), 21.7 (q, C-37'), 23.2 (q, C-37), 24.6 (d, C-36), 24.8 (t, C-31), 25.8 (t, C-7), 26.1 (t, C-5), 30.9 (t, C-8), 40.1 (t, C-35), 40.7 (t, C-40), 46.8 (d, C-34), 53.2 (d, C-3), 55.7 (d, C-28), 70.5 (t, C-21), 79.0 (d, C-15), 79.1 (d, C-9), 136.7 (s, C-41), 138.3 (s, C-23), 138.6 (s, C-11), 138.8 (s, C-17), 170.9 (s, C-33), 172.8 (s, C-2).

**HRMS (ESI)** calculated for  $\text{C}_{58}\text{H}_{79}\text{N}_4\text{O}_{10}$   $[\text{M}+\text{H}]^+$ : 991.5791, found: 991.5743.

**(3*S*,6*R*,9*S*,15*aS*)-6-Benzyl-9-isobutyl-3-[[*(6*S*,7*S*)-6,7,8-tris(benzyloxy)octyl]octahydro-2*H*-pyrido[1,2-*a*][1,4,7,10]tetraazacyclododecine-1,4,7,10(3*H*,12*H*)-tetraone (22)***

A LiOH solution (1 M in water, 334  $\mu\text{L}$ , 334  $\mu\text{mol}$ , 1.2 equiv) was added dropwise at 0 °C to a solution of tetrapeptide **21** (276 mg, 278  $\mu\text{mol}$ , 1.0 equiv) in 1,4-dioxane (2.3 mL) and the resulting solution was warmed to room temperature over 16 hours. Subsequently, the mixture was acidified with aqueous HCl solution (1 M) and extracted three times with ethyl acetate. The combined organic phases were dried over  $\text{Na}_2\text{SO}_4$  and the solvent was removed in vacuo to afford the carboxylic acid (263 mg, 269  $\mu\text{mol}$ , 97 %) as a white lyophilisate.  $R_f = 0.28$  ( $\text{SiO}_2$ , PE:EtOAc 50:50);  $[\alpha]_D^{20} = -32.3$  [ $c = 0.5$ ,  $\text{CHCl}_3$ ].

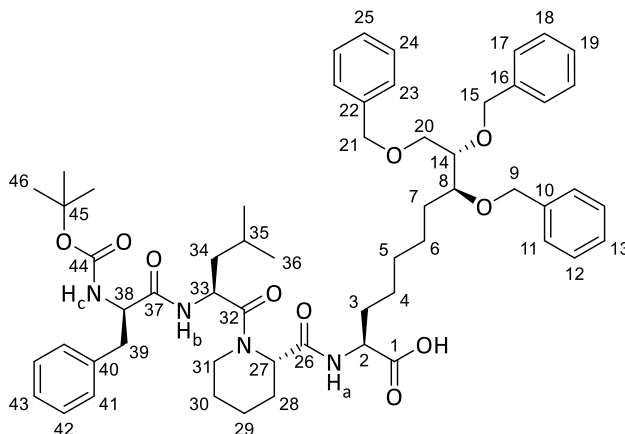

**Major rotamer:**

**$^1\text{H-NMR}$  (500 MHz,  $\text{DMSO-d}_6$ , 373 K):**  $\delta = 0.85$  (d,  $^3J_{36,35} = 6.3$  Hz, 3 H, 36-H), 0.86 (d,  $^3J_{36',35} = 6.3$  Hz, 3 H, 36'-H'), 1.20 – 1.66 (m, 17 H, 3-H, 4-H, 5-H, 6-H, 7-H, 28- $\text{H}_a$ , 29-H, 30-H, 34-H), 1.32 (s, 9 H, 46-H), 1.73 (m, 1 H, 35-H), 2.18 (m, 1 H, 28- $\text{H}_b$ ), 2.80 (dd,  $^2J_{39a,39b} = 13.8$  Hz,  $^3J_{39a,38} = 9.2$  Hz, 1 H, 39- $\text{H}_a$ ), 2.99 (m,  $^2J_{39b,39a} = 13.8$  Hz,  $^3J_{39b,38} = 5.3$  Hz, 1 H, 39- $\text{H}_b$ ), 3.27 (m, 1 H, 31- $\text{H}_a$ ), 3.55 (dt,  $^3J_{8,14} = 7.6$  Hz,  $^3J_{8,7} = 4.6$  Hz, 1 H, 8-H), 3.62 (dd,  $^2J_{20a,20b} = 10.1$  Hz,  $^3J_{20a,14} = 5.8$  Hz, 1 H, 20- $\text{H}_a$ ), 3.68 – 3.75 (m, 2 H, 14-H, 20- $\text{H}_b$ ), 3.89 (m, 1 H, 31- $\text{H}_b$ ), 4.19 – 4.29 (m, 2 H, 33-H, 38-H), 4.50 (d,  $^2J_{9a,9b} = 11.8$  Hz, 1 H, 9- $\text{H}_a$ ), 4.50 (s, 2 H, 21-H), 4.55 (d,  $^2J_{9b,9a} = 11.8$  Hz, 1 H, 9- $\text{H}_b$ ), 4.59 (d,  $^2J_{15a,15b} = 12.1$  Hz, 1 H, 15- $\text{H}_a$ ), 4.68 (d,  $^2J_{15b,15a} = 12.1$  Hz, 1 H, 15- $\text{H}_b$ ), 4.81 (m, 1 H, 2-H), 5.05 (m, 1 H, 27-H), 6.36 (m, 1 H, N- $\text{H}_c$ ), 7.15 – 7.36 (m, 21 H, 11-H, 12-H, 13-H, 17-H, 18-H, 19-H, 23-H, 24-H, 25-H, 41-H, 42-H, 43-H, N- $\text{H}_b$ ), 7.75 (d,  $^3J_{\text{NH}_a,3} = 8.2$  Hz, 1 H, N- $\text{H}_a$ ).

**$^{13}\text{C-NMR}$  (100 MHz,  $\text{CDCl}_3$ ):**  $\delta = 20.0$  (t, C-29), 21.6 (q, C-36'), 23.3 (q, C-36), 24.6 (d, C-35), 25.4 (t, C-30), 25.7 (t, C-6), 26.3 (t, C-4), 28.2 (q, C-46), 28.2 (t, C-28), 29.3 (t, C-3), 30.0 (t, C-5), 32.0 (t, C-7), 39.1 (t, C-39), 41.5 (t, C-34), 43.8 (t, C-31), 47.1 (d, C-33), 52.2 (d, C-38), 52.2 (d, C-2), 56.8 (d, C-27), 70.4 (t, C-20), 72.7 (t, C-9), 72.9 (t, C-15), 73.3 (t, C-21), 79.0 (d, C-14), 79.0 (d, C-8), 126.8, 127.5, 127.6, 127.6, 127.6, 127.9, 128.0, 128.2, 128.3, 128.5, 128.6, 129.2 (12d, C-11, C-12, C-13, C-17, C-18, C-19, C-23, C-24, C-25, C-41, C-42, C-43), 138.2 (s, C-40), 138.3 (s, C-22), 138.5 (s, C-10), 138.7 (s, C-16), 155.3 (s, C-44), 170.8 (s, C-37), 172.6 (s, C-26), 174.3 (s, C-32), 174.8 (s, C-1).

The signal of C-45 is located in the noise.

**Minor rotamer (selected signals):**

**$^{13}\text{C-NMR}$  (100 MHz,  $\text{CDCl}_3$ ):**  $\delta = 25.3$  (t, C-30), 25.8 (t, C-6), 26.0 (t, C-4), 26.9 (t, C-7), 40.3 (t, C-34), 53.3 (d, C-2), 70.5 (t, C-20), 138.6 (s, C-10), 138.7 (s, C-16).

**HRMS (ESI)** calculated for  $\text{C}_{57}\text{H}_{77}\text{N}_4\text{O}_{10}$   $[\text{M}+\text{H}]^+$ : 977.5634, found: 977.5661

**Boc-cleavage:**

The carboxylic acid (263 mg, 269  $\mu\text{mol}$ , 1.0 equiv) was dissolved in DCM (1.1 mL) and thereafter treated at 0 °C with a TFA:triisopropylsilane:water mixture (92.5:5:2.5, 1.1 mL). The resulting solution was stirred at 0 °C for 40 minutes before the solvent was removed under reduced pressure and the crude product was used in the next step without further purification.

### Cyclization:

A solution of the previously synthesized TFA salt in DMF (20 mL) was added dropwise at 0 °C over 4 hours to a solution of PyAOP (1.40 g, 2.69 mmol, 10.0 equiv), HOAt (366 mg, 2.69 mmol, 10.0 equiv) and DIPEA (470  $\mu$ L, 348 mg, 2.69 mmol, 10.0 equiv) in DMF (250 mL) and the reaction mixture was thereafter warmed to room temperature over 16 hours. After solvent removal, the residue was dissolved in ethyl acetate and was washed with NaHCO<sub>3</sub> solution (saturated). The aqueous phase was extracted with ethyl acetate and the combined organic phases were dried over Na<sub>2</sub>SO<sub>4</sub>. After solvent removal, the crude product was purified by flash chromatography (SiO<sub>2</sub>, cyclohexane:EtOAc 100:0  $\rightarrow$  60:40) to afford cyclopeptide **22** (145 mg, 168  $\mu$ mol, 63 % over 2 steps) as a white lyophilisate.  $R_f$  (**22**) = 0.43 (SiO<sub>2</sub>, PE:EtOAc 50:50);  $[\alpha]_D^{20} = -51.1$  [c = 0.5, CHCl<sub>3</sub>].

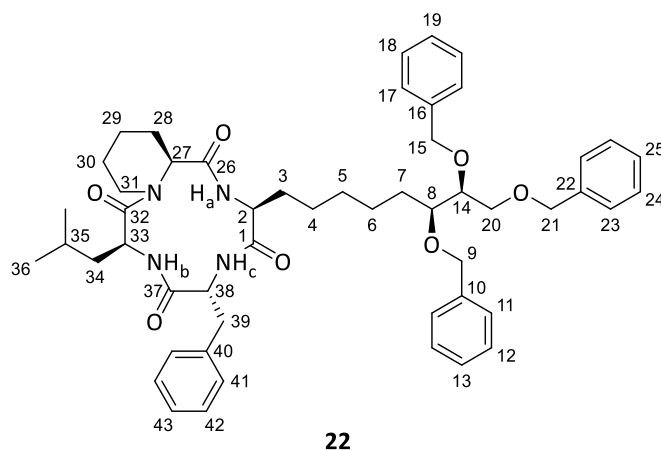

**<sup>1</sup>H-NMR (400 MHz, CDCl<sub>3</sub>):**  $\delta$  = 0.80 (d,  $^3J_{36,35} = 6.5$  Hz, 3 H, 36-H), 0.81 (d,  $^3J_{36',35} = 6.4$  Hz, 3 H, 36-H'), 1.06 – 1.30 (m, 7 H, 4-H<sub>a</sub>, 5-H, 6-H, 29-H<sub>a</sub>, 35-H), 1.30 – 1.45 (m, 3 H, 4-H<sub>b</sub>, 7-H<sub>a</sub>, 30-H<sub>a</sub>), 1.46 – 1.62 (m, 2 H, 3-H<sub>a</sub>, 7-H<sub>b</sub>), 1.62 – 1.82 (m, 4 H, 3-H<sub>b</sub>, 28-H<sub>a</sub>, 29-H<sub>b</sub>, 30-H<sub>b</sub>), 2.48 (m, 1 H, 28-H<sub>b</sub>), 2.66 (m, 1 H, 31-H<sub>a</sub>), 2.87 (dd,  $^2J_{39a,39b} = 14.0$  Hz,  $^3J_{39a,38} = 6.7$  Hz, 1 H, 39-H<sub>a</sub>), 3.25 (dd,  $^2J_{39b,39a} = 14.0$  Hz,  $^3J_{39b,38} = 8.8$  Hz, 1 H, 39-H<sub>b</sub>), 3.49 (dt,  $^3J_{8,14} = 8.2$  Hz,  $^3J_{8,7} = 4.3$  Hz, 1 H, 8-H), 3.61 (dd,  $^2J_{20a,20b} = 10.9$  Hz,  $^3J_{20a,14} = 7.1$  Hz, 1 H, 20-H<sub>a</sub>), 3.67 – 3.73 (m, 2 H, 14-H, 20-H<sub>b</sub>), 4.45 (m, 1 H, 2-H), 4.49 (d,  $^2J_{9b,9a} = 11.6$  Hz, 1 H, 9-H<sub>a</sub>), 4.51 (s, 2 H, 21-H), 4.57 (d,  $^2J_{9b,9a} = 11.6$  Hz, 1 H, 9-H<sub>b</sub>), 4.58 (m, 1 H, 31-H<sub>b</sub>), 4.61 (d,  $^2J_{15a,15b} = 12.0$  Hz, 1 H, 15-H<sub>a</sub>), 4.65 (m, 1 H, 38-H), 4.75 (d,  $^2J_{15b,15a} = 12.0$  Hz, 1 H, 15-H<sub>b</sub>), 4.76 (m, 1 H, 27-H), 4.91 (m, 1 H, 33-H), 5.83 (m, 2 H, N-H<sub>a</sub>, N-H<sub>b</sub>), 6.15 (d,  $^3J_{NHc,38} = 10.8$  Hz, 1 H, N-H<sub>c</sub>), 7.16 – 7.36 (m, 20 H, 11-H, 12-H, 13-H, 17-H, 18-H, 19-H, 23-H, 24-H, 25-H, 41-H, 42-H, 43-H). **<sup>13</sup>C-NMR (100 MHz, CDCl<sub>3</sub>):**  $\delta$  = 20.7 (t, C-29), 22.0 (q, C-36'), 23.1 (q, C-36), 23.9 (d, C-35), 24.8 (t, C-30), 25.6 (t, C-6), 25.8 (t, C-4), 26.8 (t, C-28), 27.7 (t, C-3), 29.3 (t, C-5), 29.9 (t, C-7), 34.8 (t, C-39), 40.5 (t, C-31), 41.1 (t, C-34), 47.0 (d, C-33), 54.1 (d, C-2), 55.5 (d, C-38), 57.1 (d, C-27), 70.4 (t, C-20), 72.7 (t, C-9), 72.9 (t, C-15), 73.3 (t, C-21), 79.0 (d, C-14), 79.0 (d, C-8), 126.6, 127.5, 127.5, 127.6, 127.9, 128.0, 128.2, 128.3, 128.3, 128.4, 129.2 (12d, C-11, C-12, C-13, C-17, C-18, C-19, C-23, C-24, C-25, C-41, C-42, C-43), 136.7 (s, C-40), 138.3 (s, C-22), 138.6 (s, C-10), 138.7 (s, C-16), 169.5 (s, C-37), 171.2 (s, C-32), 174.3 (s, C-1), 174.5 (s, C-26).

**HRMS (ESI)** calculated for C<sub>52</sub>H<sub>67</sub>N<sub>4</sub>O<sub>7</sub> [M+H]<sup>+</sup>: 859.5004, found: 859.5005.

### (3*S*,6*R*,9*S*,15*aS*)-6-Benzyl-3-{(3*S*)-6-hydroxy-6-[(*S*)-oxiran-2-yl]hexyl}-9-isobutyloctahydro-2*H*-pyrido[1,2-*a*][1,4,7,10]tetraazacyclododecyne-1,4,7,10(3*H*,12*H*)-tetraone (**23**)

#### Hydrogenation:

A solution of cyclopeptide **22** (145 mg, 168  $\mu$ mol, 1.0 equiv) in methanol (3.4 mL) was treated with palladium on charcoal (10 wt% Pd, 30.0 mg) and the resulting suspension was stirred under hydrogen atmosphere (20 bar) at room temperature for 16 hours. The reaction mixture was filtered through a syringe filter and the filtrate was concentrated in vacuo. After flash chromatography (C18, H<sub>2</sub>O:MeCN 100:0  $\rightarrow$  0:100) the triol (87.8 mg, 149  $\mu$ mol, 89 %) was obtained as a white lyophilisate.

### Mesylation:

2,4,6-Collidine (97.0  $\mu\text{L}$ , 89.0 mg, 732  $\mu\text{mol}$ , 10.0 equiv) and mesyl chloride (6.9  $\mu\text{L}$ , 10.1 mg, 88.6  $\mu\text{mol}$ , 1.2 equiv) were added at 0 °C to a solution of the previously synthesized triol (43.1 mg, 73.0  $\mu\text{mol}$ , 1.0 equiv) in DCM (732  $\mu\text{L}$ ) and the reaction mixture was stirred at 0 °C for 21 hours. Subsequently, the solution was diluted with methanol and the solvent was removed under reduced pressure. The crude product was used in the next step without further purification.

### Ring closure:

The previously synthesized crude product was dissolved in methanol (14.6 mL) and the resulting solution was treated with DBU (55.0  $\mu\text{L}$ , 55.6 mg, 365  $\mu\text{mol}$ , 5.0 equiv) at 0 °C. The reaction mixture was stirred at 0 °C for 5.5 h before removing the solvent in vacuo. After flash chromatography (C18, H<sub>2</sub>O:MeCN 100:0  $\rightarrow$  0:100) and preparative HPLC (Phenomenex Luna, H<sub>2</sub>O:MeCN 100:0  $\rightarrow$  0:100) epoxide **23** (13.3 mg, 23.0  $\mu\text{mol}$ , 32 %) was obtained as a white lyophilisate. A significant amount of the triol intermediate (6.2 mg, 10.5  $\mu\text{mol}$ , 14 %) could be recovered.  $R_f$  (**23**) = 0.25 (SiO<sub>2</sub>, DCM:MeOH 95:5);  $[\alpha]_D^{20} = -97.8$  [c = 1.0, CHCl<sub>3</sub>].

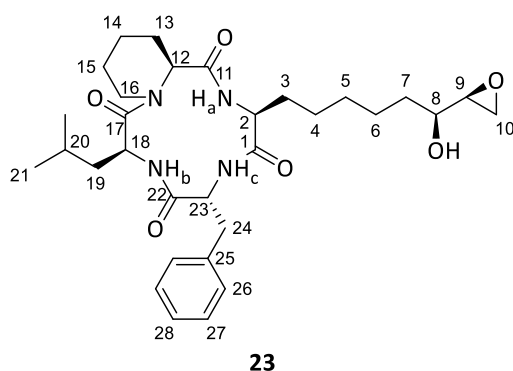

**<sup>1</sup>H-NMR (500 MHz, CDCl<sub>3</sub>):**  $\delta$  = 0.80 (d,  $^3J_{21,20} = 6.6$  Hz, 3 H, 21-H), 0.81 (d,  $^3J_{21',20'} = 6.6$  Hz, 3 H, 21-H'), 1.16 (m, 1 H, 20-H), 1.20 – 1.45 (m, 7 H, 4-H, 5-H, 6-H<sub>a</sub>, 14-H<sub>a</sub>, 15-H<sub>a</sub>), 1.45 – 1.69 (m, 7 H, 3-H<sub>a</sub>, 6-H<sub>b</sub>, 7-H, 13-H<sub>a</sub>, 19-H), 1.70 – 1.79 (m, 2 H, 14-H<sub>b</sub>, 15-H<sub>b</sub>), 1.83 (m, 1 H, 3-H<sub>b</sub>), 2.12 (bs, 1 H, O-H), 2.48 (m, 1 H, 13-H<sub>b</sub>), 2.68 (ddd,  $^2J_{16a,16b} = ^3J_{16a,15a} = 13.4$  Hz,  $^3J_{16a,15b} = 2.9$  Hz, 1 H, 16-H<sub>a</sub>), 2.71 (dd,  $^2J_{10a,10b} = 4.9$  Hz,  $^3J_{10a,9} = 2.9$  Hz, 1 H, 10-H<sub>a</sub>), 2.82 (dd,  $^2J_{10b,10a} = 4.9$  Hz,  $^3J_{10b,9} = 4.3$  Hz, 1 H, 10-H<sub>b</sub>), 2.88 (dd,  $^2J_{24a,24b} = 13.9$  Hz,  $^3J_{24a,23} = 6.8$  Hz, 1 H, 24-H<sub>a</sub>), 2.97 (ddd,  $^3J_{9,8} = 5.0$  Hz,  $^3J_{9,10b} = 4.3$  Hz,  $^3J_{9,10a} = 2.9$  Hz, 1 H, 9-H), 3.25 (dd,  $^2J_{24b,24a} = 13.9$  Hz,  $^3J_{24b,23} = 8.9$  Hz, 1 H, 24-H<sub>b</sub>), 3.42 (m, 1 H, 8-H), 4.52 (ddd,  $^3J_{2,3b} = 10.2$  Hz,  $^3J_{2,3a} = ^3J_{2,NH_a} = 7.7$  Hz, 1 H, 2-H), 4.59 (m, 1 H, 16-H<sub>b</sub>), 4.64 (ddd,  $^3J_{23,NH_c} = 10.8$  Hz,  $^3J_{23,24b} = 8.9$  Hz,  $^3J_{23,24a} = 6.8$  Hz, 1 H, 23-H), 4.80 (m, 1 H, 12-H), 4.91 (td,  $^3J_{18,19} = 8.9$  Hz,  $^3J_{18,NH_b} = 6.1$  Hz, 1 H, 18-H), 5.95 – 6.15 (m, 2 H, N-H<sub>a</sub>, N-H<sub>b</sub>), 6.29 (d,  $^3J_{NH_c,23} = 10.8$  Hz, 1 H, N-H<sub>c</sub>), 7.16 – 7.26 (m, 5 H, 26-H, 27-H, 28-H). **<sup>13</sup>C-NMR (125 MHz, CDCl<sub>3</sub>):**  $\delta$  = 20.8 (t, C-14), 22.1 (q, C-21'), 23.1 (q, C-21), 24.0 (d, C-20), 24.8 (t, C-15), 25.0 (t, C-6), 25.5 (t, C-4), 26.8 (t, C-13), 27.6 (t, C-3), 29.1 (t, C-5), 34.2 (t, C-7), 34.8 (t, C-24), 40.5 (t, C-16), 41.1 (t, C-19), 45.2 (t, C-10), 47.0 (d, C-18), 54.2 (d, C-2), 55.4 (d, C-9), 55.5 (d, C-23), 57.2 (d, C-12), 71.5 (d, C-8), 126.7 (d, C-28), 128.4 (d, C-27), 129.2 (d, C-26), 136.7 (s, C-25), 169.9 (s, C-22), 171.3 (s, C-17), 174.3 (s, C-1), 174.6 (s, C-11).

**HRMS (CI)** calculated for C<sub>31</sub>H<sub>47</sub>N<sub>4</sub>O<sub>6</sub> [M+H]<sup>+</sup>: 571.3490, found: 571.3508.

### WF-3161

DMP (10.1 mg, 23.8  $\mu\text{mol}$ , 2.0 equiv) was added to a solution of epoxide **23** (6.8 mg, 11.9  $\mu\text{mol}$ , 1.0 equiv) in DCM (1.2 mL) and the reaction mixture was stirred at room temperature for 2 hours. After solvent removal, the crude product was purified by flash chromatography (C18, H<sub>2</sub>O:MeCN 100:0  $\rightarrow$  0:100) and preparative HPLC (Phenomenex Luna, H<sub>2</sub>O:MeCN 100:0  $\rightarrow$  0:100) to afford **WF-3161** (3.9 mg, 6.86  $\mu\text{mol}$ , 58 %) as a white lyophilisate.  $[\alpha]_D^{20} = -115.5$  [c = 0.5, CHCl<sub>3</sub>].

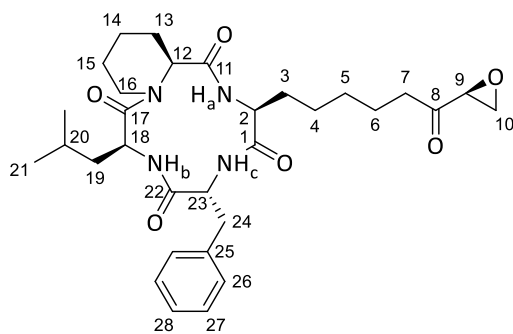

**WF-3161**

**<sup>1</sup>H-NMR (500 MHz, CDCl<sub>3</sub>):**  $\delta$  = 0.80 (d,  $^3J_{21,20}$  = 6.7 Hz, 3 H, 21-H), 0.81 (d,  $^3J_{21',20}$  = 6.7 Hz, 3 H, 21'-H), 1.17 (m, 1 H, 20-H), 1.23 – 1.35 (m, 5 H, 4-H, 5-H, 14-H<sub>a</sub>), 1.41 (m, 1 H, 15-H<sub>a</sub>), 1.48 – 1.69 (m, 6 H, 3-H<sub>a</sub>, 6-H, 13-H<sub>a</sub>, 19-H), 1.69 – 1.79 (m, 2 H, 14-H<sub>b</sub>, 15-H<sub>b</sub>), 1.82 (m, 1 H, 3-H<sub>b</sub>), 2.27 (ddd,  $^2J_{7a,7b}$  = 17.1 Hz,  $^3J_{7a,6a}$  = 7.9 Hz,  $^3J_{7a,6b}$  = 6.7 Hz, 1 H, 7-H<sub>a</sub>), 2.42 (ddd,  $^2J_{7b,7a}$  = 17.1 Hz,  $^3J_{7b,6b}$  = 8.1 Hz,  $^3J_{7b,6a}$  = 6.6 Hz, 1 H, 7-H<sub>b</sub>), 2.47 (m, 1 H, 13-H<sub>b</sub>), 2.69 (m, 1 H, 16-H<sub>a</sub>), 2.85 (dd,  $^2J_{10a,10b}$  = 5.7 Hz,  $^3J_{10a,9}$  = 2.4 Hz, 1 H, 10-H<sub>a</sub>), 2.88 (dd,  $^2J_{24a,24b}$  = 13.9 Hz,  $^3J_{24a,23}$  = 6.7 Hz, 1 H, 24-H<sub>a</sub>), 2.99 (dd,  $^2J_{10b,10a}$  = 5.7 Hz,  $^3J_{10b,9}$  = 4.6 Hz, 1 H, 10-H<sub>b</sub>), 3.25 (dd,  $^2J_{24b,24a}$  = 13.9 Hz,  $^3J_{24b,23}$  = 9.0 Hz, 1 H, 24-H<sub>b</sub>), 3.42 (dd,  $^3J_{9,10b}$  = 4.6 Hz,  $^3J_{9,10a}$  = 2.4 Hz, 1 H, 9-H), 4.50 (m, 1 H, 2-H), 4.58 (m, 1 H, 16-H<sub>b</sub>), 4.63 (m, 1 H, 23-H), 4.81 (m, 1 H, 12-H), 4.91 (m, 1 H, 18-H), 5.90 – 6.20 (m, 2 H, N-H<sub>a</sub>, N-H<sub>b</sub>), 6.28 (d,  $^3J_{NHc,23}$  = 10.4 Hz, 1 H, N-H<sub>c</sub>), 7.15 – 7.25 (m, 5 H, 26-H, 27-H, 28-H). **<sup>13</sup>C-NMR (125 MHz, CDCl<sub>3</sub>):**  $\delta$  = 20.7 (t, C-14), 22.1 (q, C-21'), 22.7 (t, C-6), 23.1 (q, C-21), 24.0 (d, C-20), 24.8 (t, C-15), 25.4 (t, C-4), 26.8 (t, C-13), 27.5 (t, C-3), 28.6 (t, C-5), 34.8 (t, C-24), 36.3 (t, C-7), 40.5 (t, C-16), 41.1 (t, C-19), 46.1 (t, C-10), 47.0 (d, C-18), 53.4 (d, C-9), 54.1 (d, C-2), 55.6 (d, C-23), 57.1 (d, C-12), 126.7 (d, C-28), 128.4 (d, C-27), 129.2 (d, C-26), 136.7 (s, C-25), 169.9 (s, C-22), 171.2 (s, C-17), 174.2 (s, C-1), 174.6 (s, C-11), 207.5 (s, C-8).

**HRMS (CI)** calculated for C<sub>31</sub>H<sub>45</sub>N<sub>4</sub>O<sub>6</sub> [M+H]<sup>+</sup>: 569.3334, found: 569.3325.

## NMR spectra

### (((4*S,S*)-5-((*Z*)-4-[(4-Methoxybenzyl)oxy]but-1-ene-1-yl)-2,2-dimethyl-1,3-dioxolan-4-yl)methoxy)triisopropylsilane (**3**)

400 MHz, CDCl<sub>3</sub>

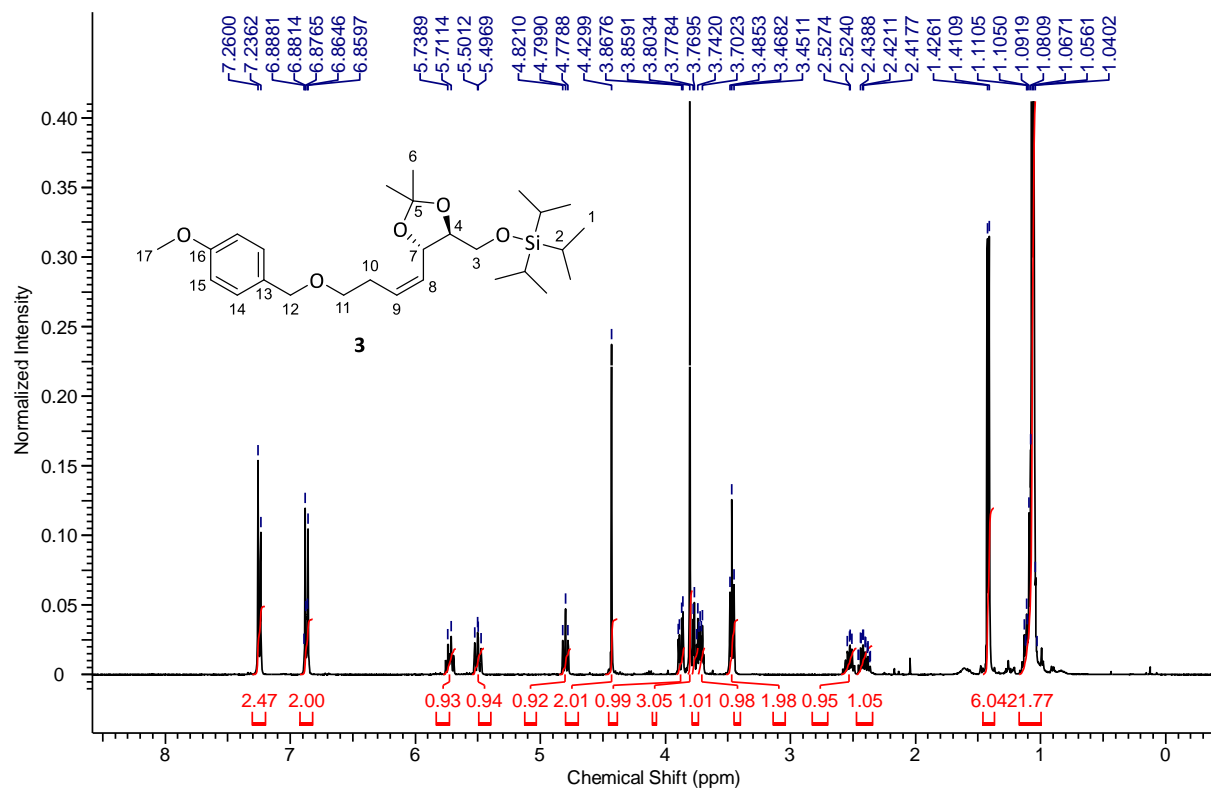

100 MHz, CDCl<sub>3</sub>

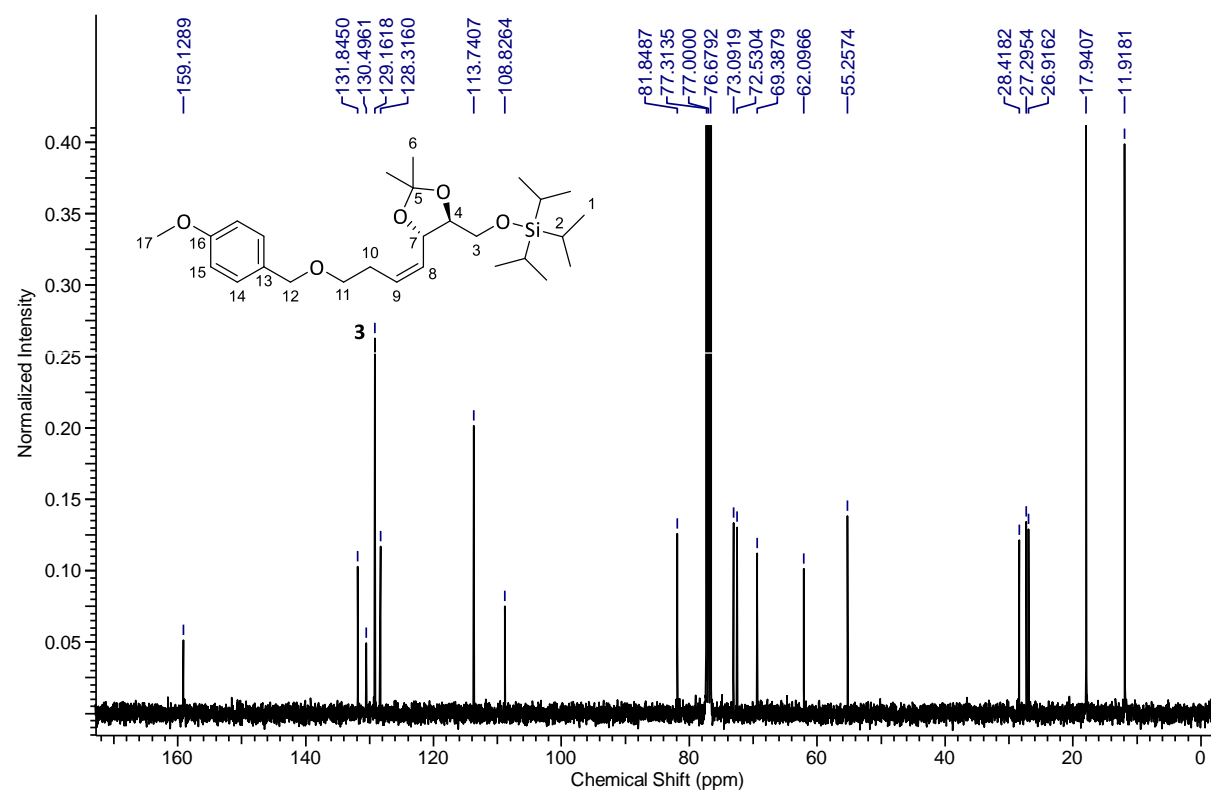

**((4S,5S)-5-{4-[(4-Methoxybenzyl)oxy]butyl}-2,2-dimethyl-1,3-dioxolan-4-yl)methoxy]triisopropylsilane**

400 MHz, CDCl<sub>3</sub>

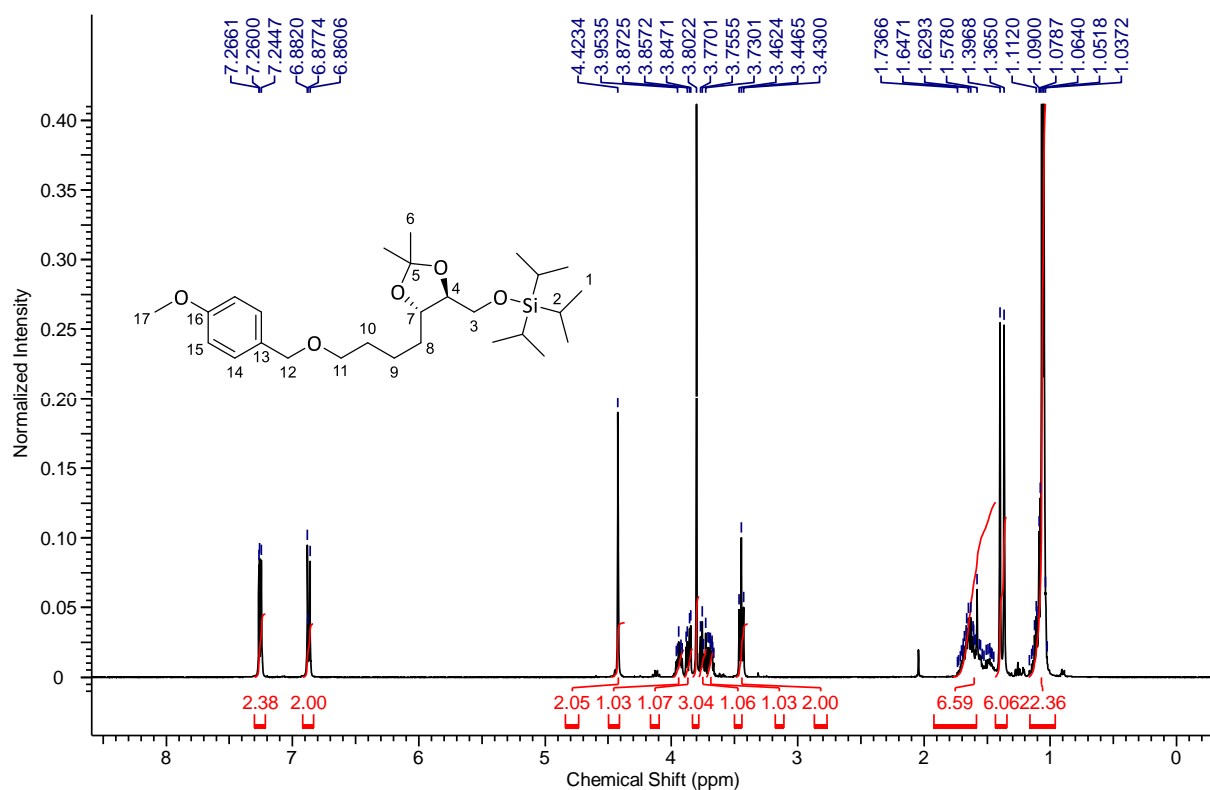

100 MHz, CDCl<sub>3</sub>

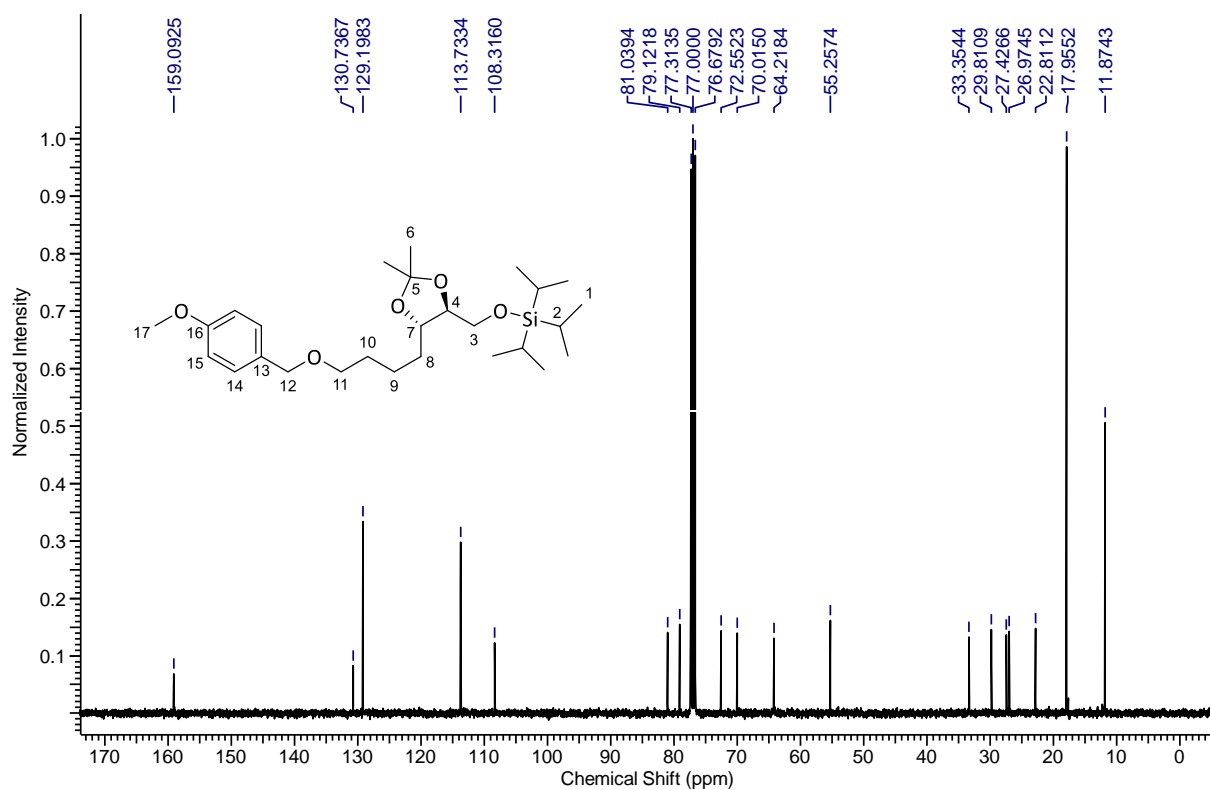

4-((4S,5S)-2,2-Dimethyl-5-[[tr(isopropyl)silyl]oxy]methyl]-1,3-dioxolan-4-yl)butan-1-ol (4)

400 MHz, CDCl<sub>3</sub>

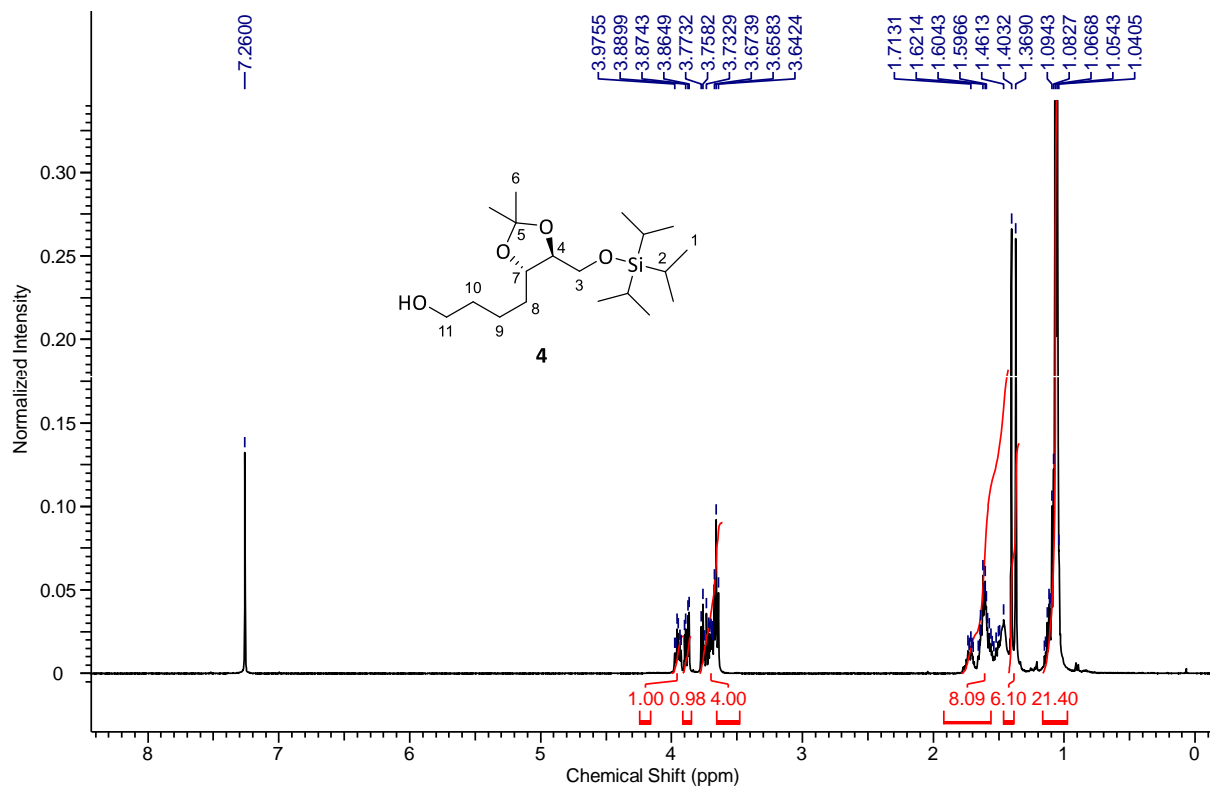

100 MHz, CDCl<sub>3</sub>

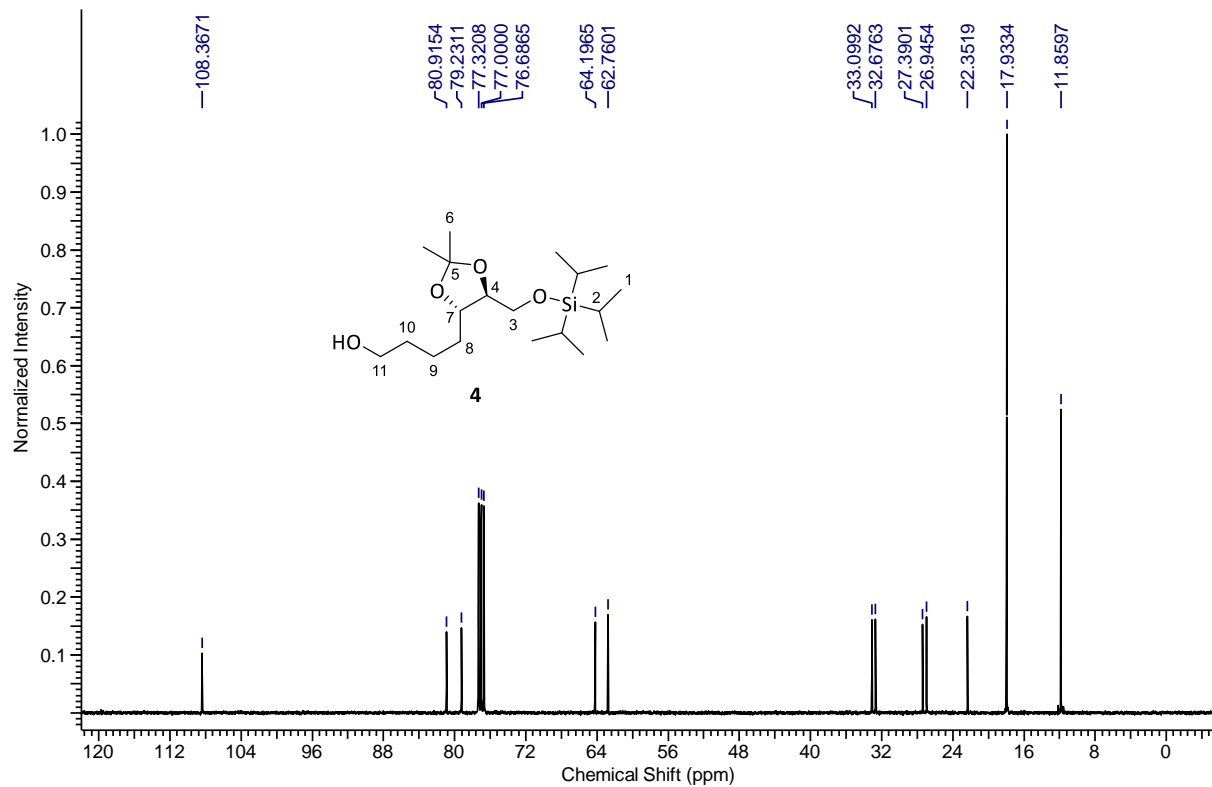



# [[[(4S,5S)-5-(4-iodobutyl)-2,2-dimethyl-1,3-dioxolan-4-yl]methoxy]triisopropylsilane (5)

400 MHz, CDCl<sub>3</sub>

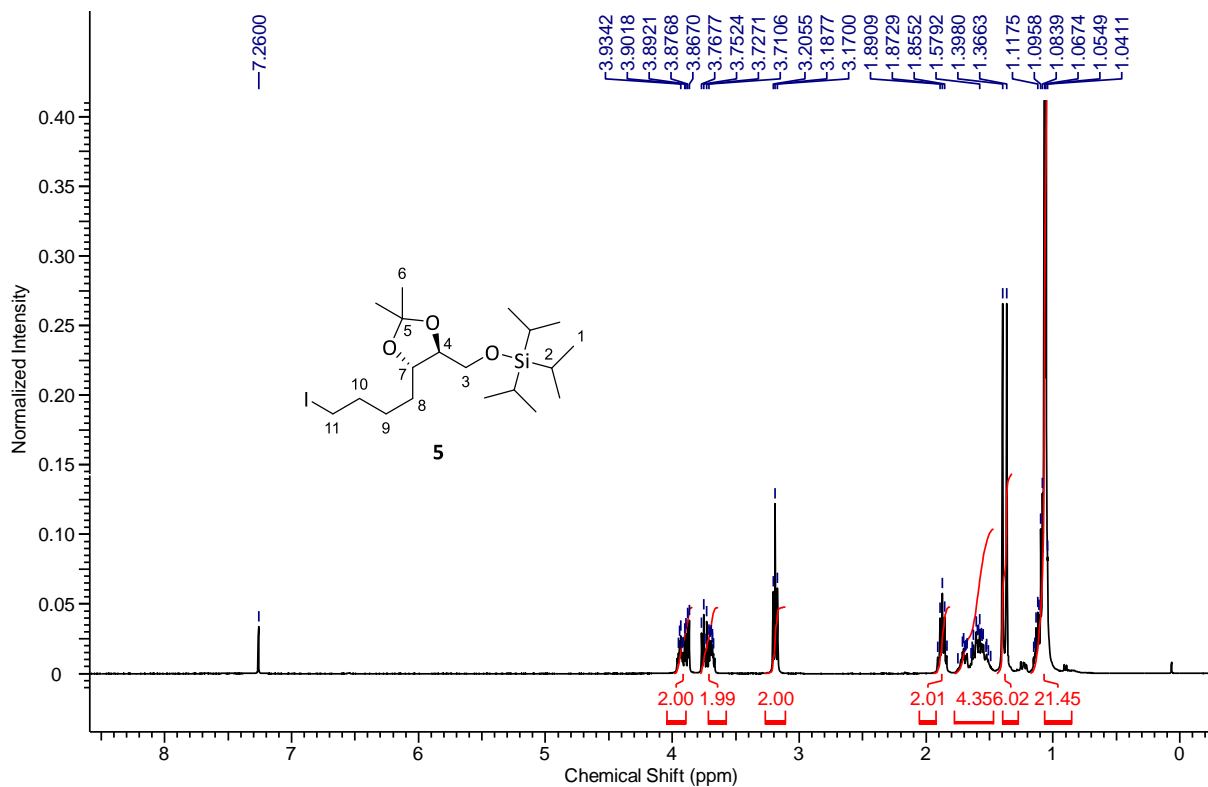

100 MHz, CDCl<sub>3</sub>

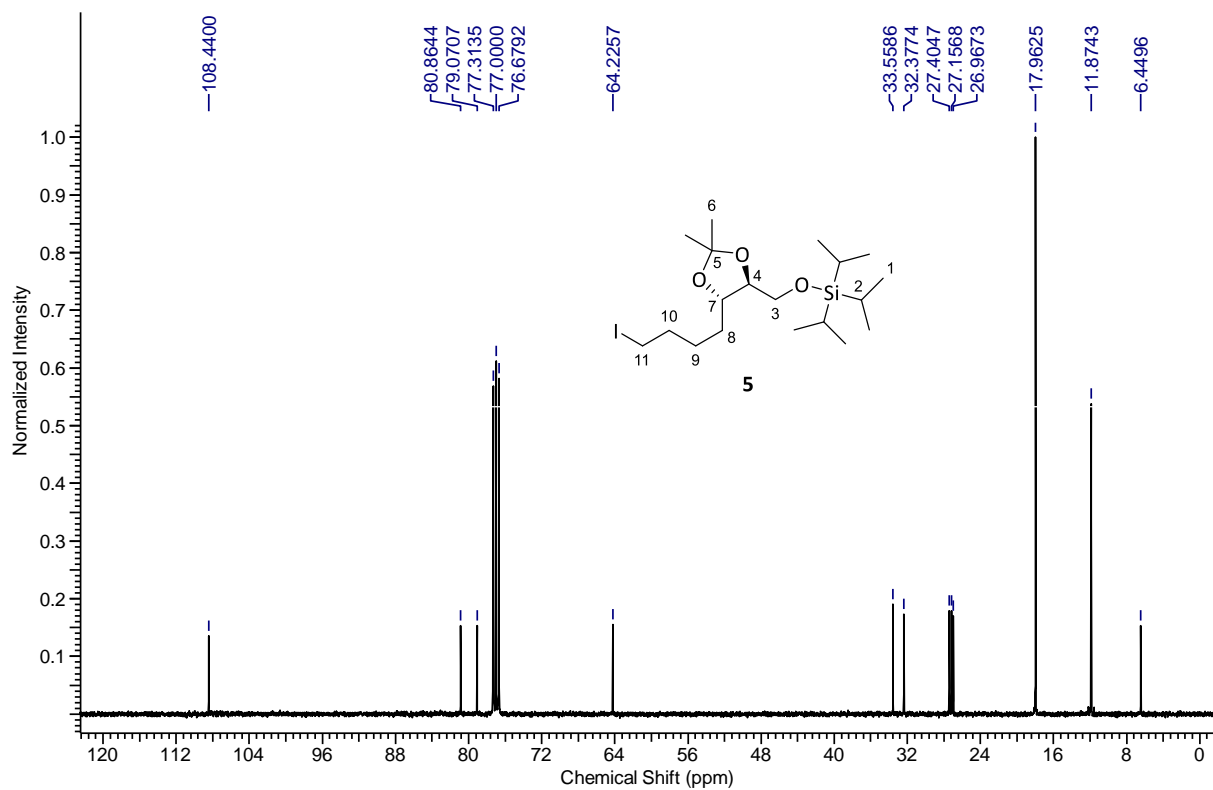

**(2S)-7-(2,2-Dimethyl-5-[[[(trisopropylsilyl)oxy]methyl]-1,3-dioxolan-4-yl]-2-(1,3-dioxoisindolin-2-yl)-N-(quinolin-8-yl)heptanamide (7)**

400 MHz, CDCl<sub>3</sub>

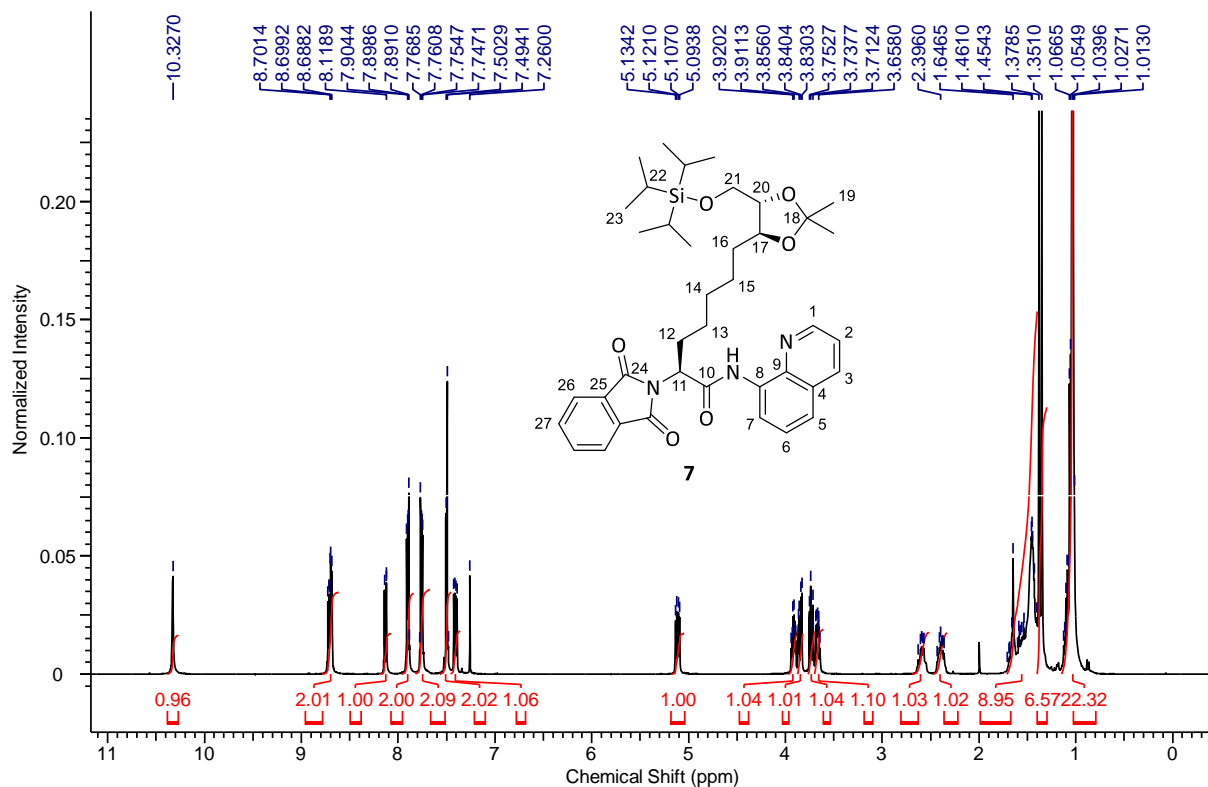

100 MHz, CDCl<sub>3</sub>

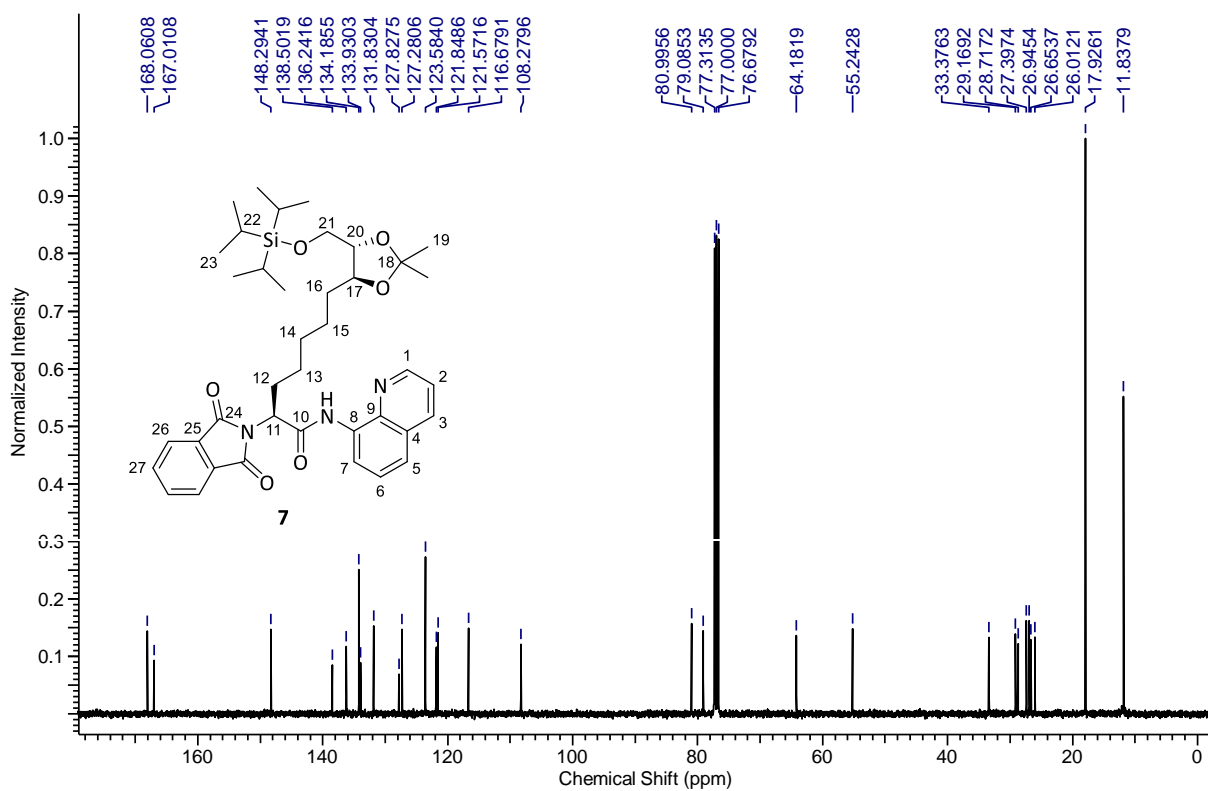

**(4*R*,5*R*)-2-[(*R*)-1-(Benzyloxy)-2-(trityloxy)ethyl]-4,5-dicyclohexyl-1,3,2-dioxaborolane (9)**

400 MHz, CDCl<sub>3</sub>

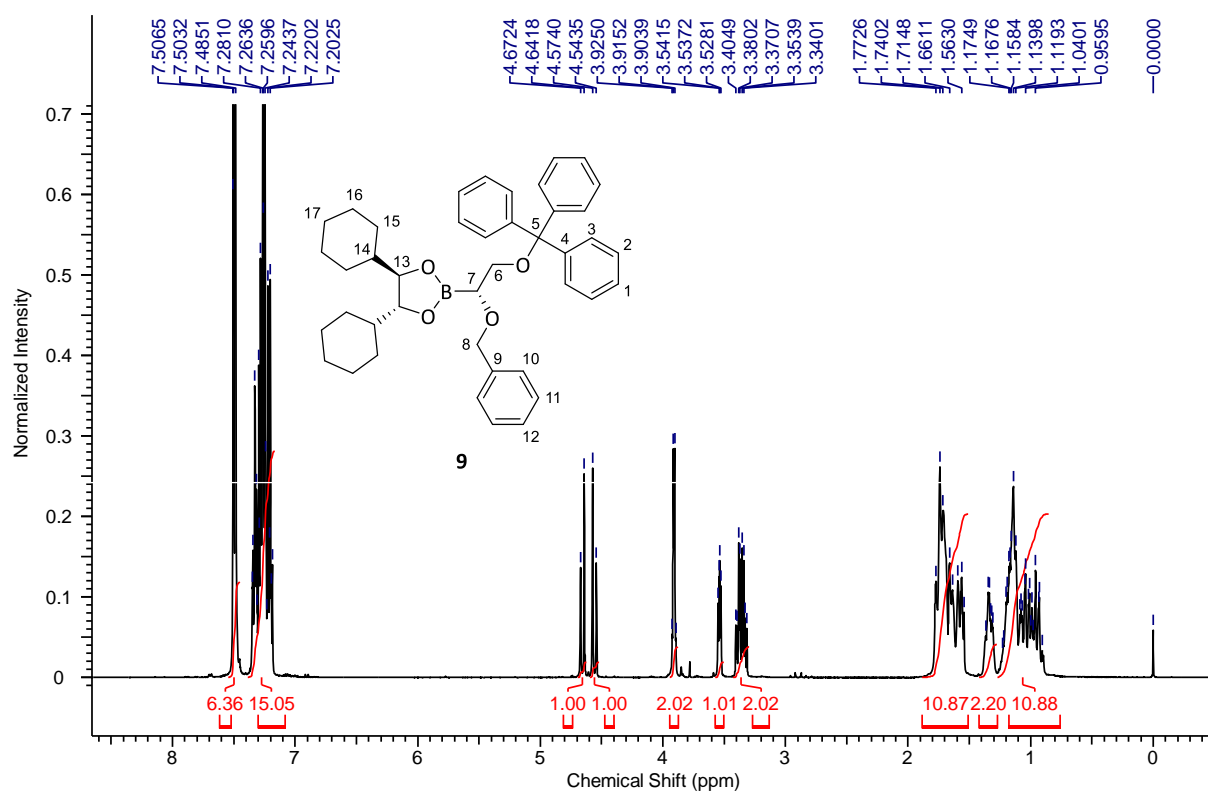

100 MHz, CDCl<sub>3</sub>

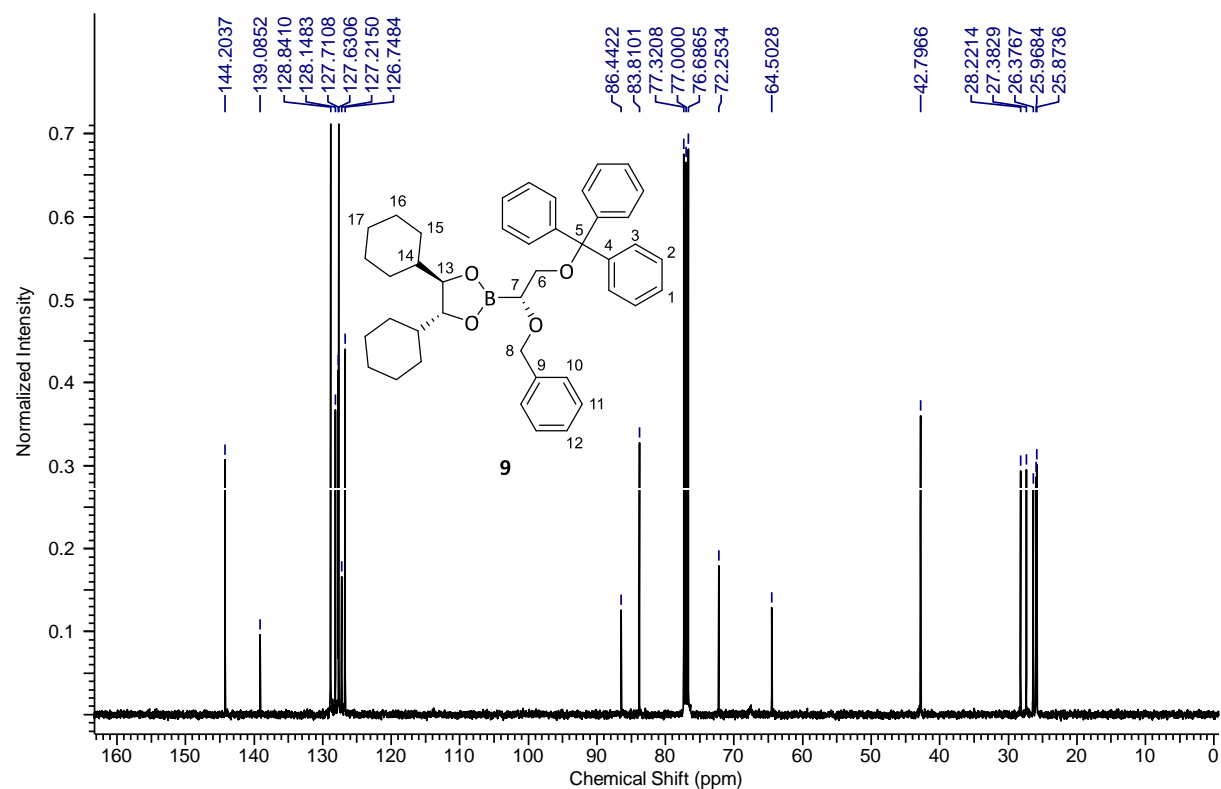

**(2S,3S)-2-(Benzoyloxy)-7-[(*tert*-butyldiphenylsilyl)oxy]-1-(trityloxy)heptan-3-ol (11)**

500 MHz, CDCl<sub>3</sub>

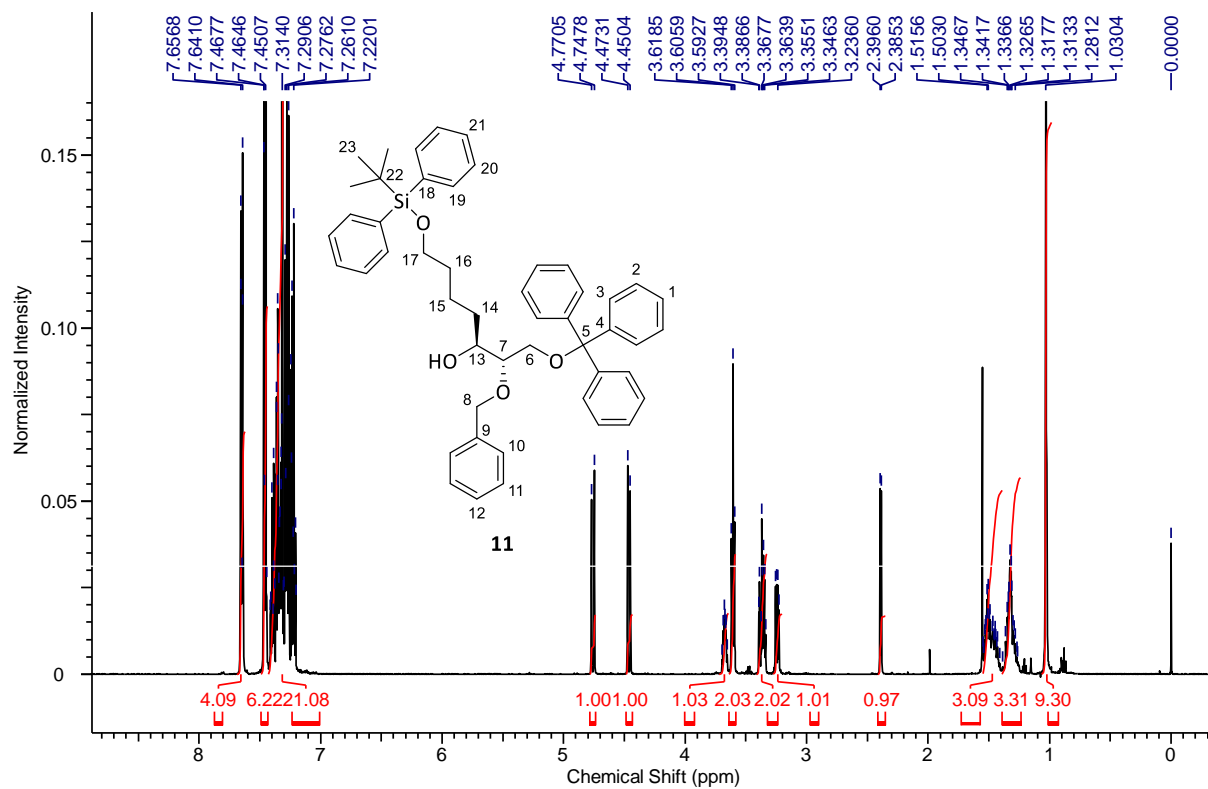

125 MHz, CDCl<sub>3</sub>

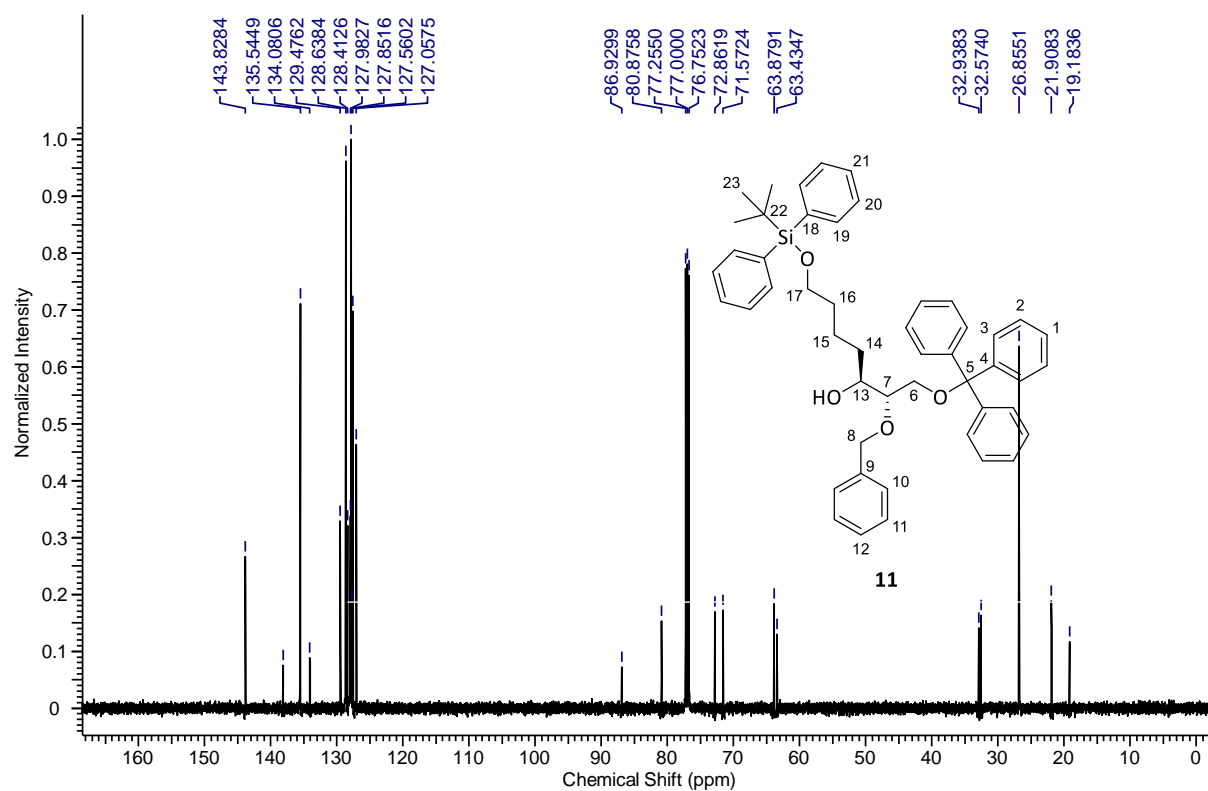

(2S,3S)-2-(Benzoyloxy)-7-[(*tert*-butyldiphenylsilyl)oxy]heptan-1,3-diol (**12**)

500 MHz, CDCl<sub>3</sub>

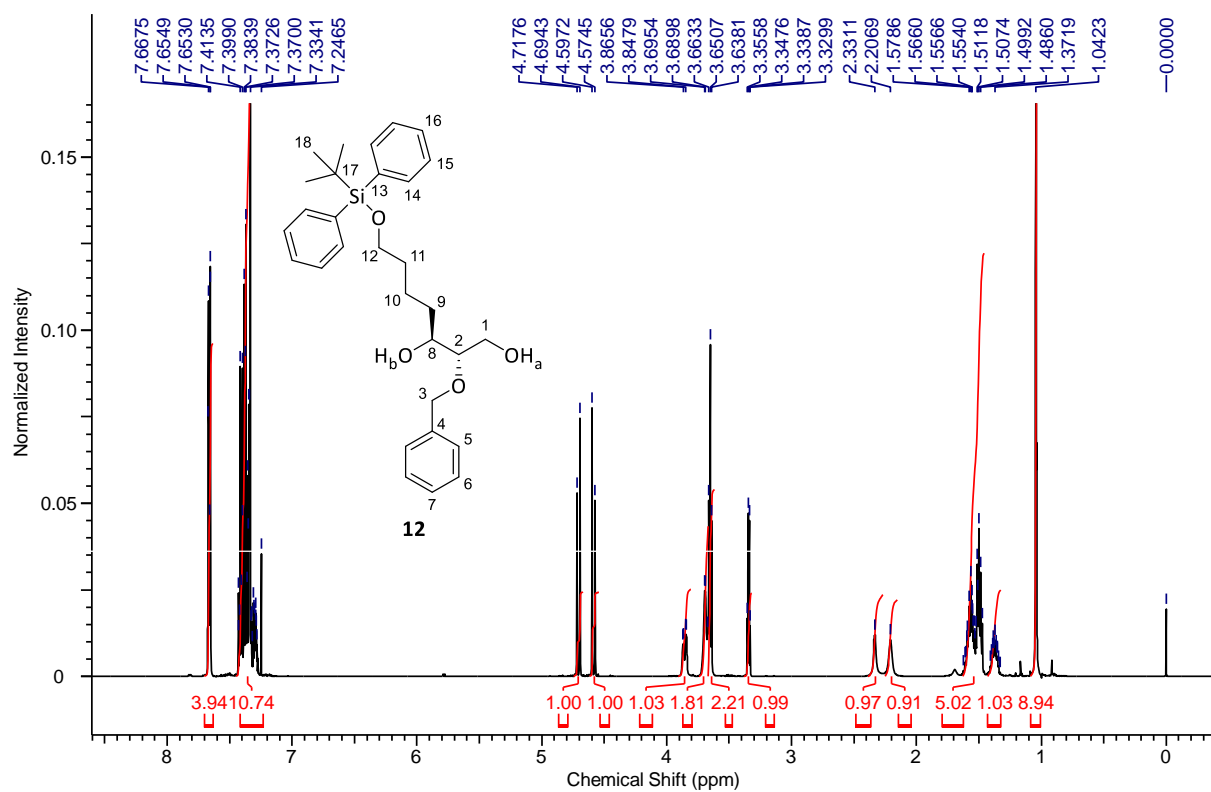

125 MHz, CDCl<sub>3</sub>

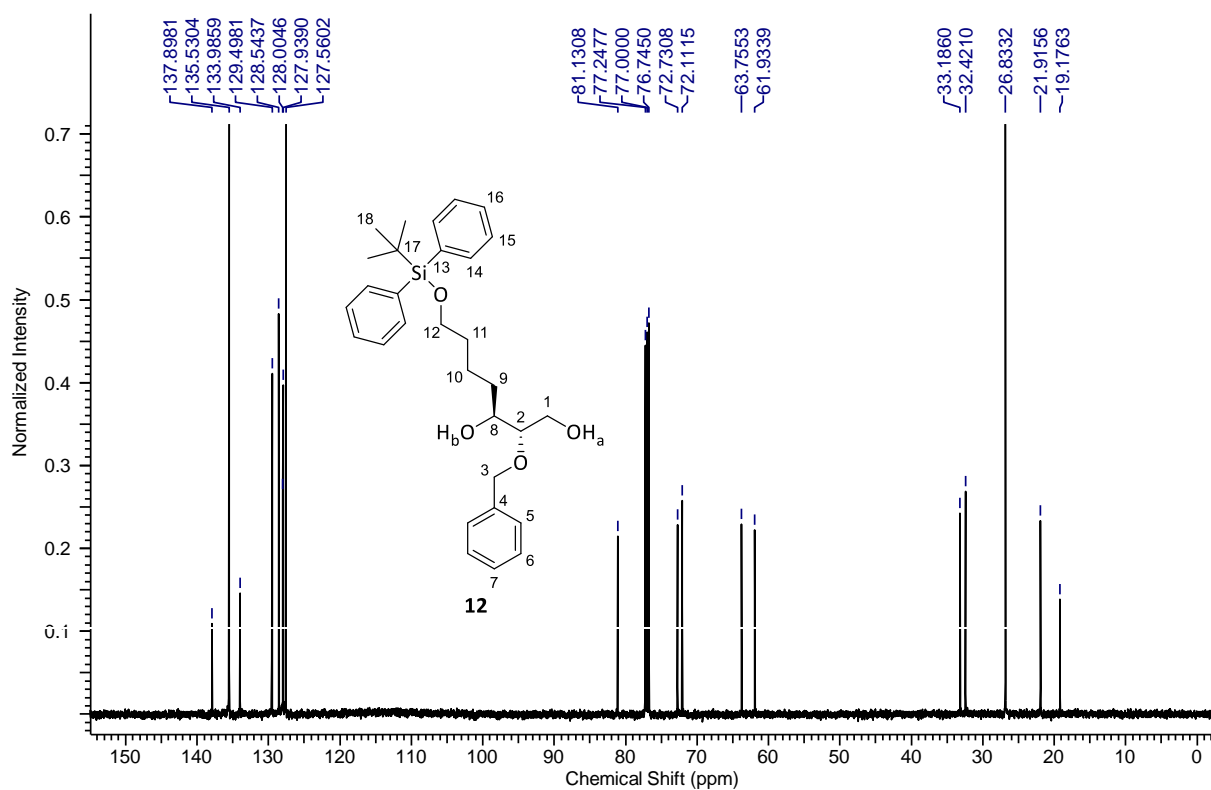

***tert*-Butyldiphenyl[[(5*S*,6*S*)-5,6,7-tris(benzyloxy)heptyl]oxy]silane (**13**)**

400 MHz, CDCl<sub>3</sub>

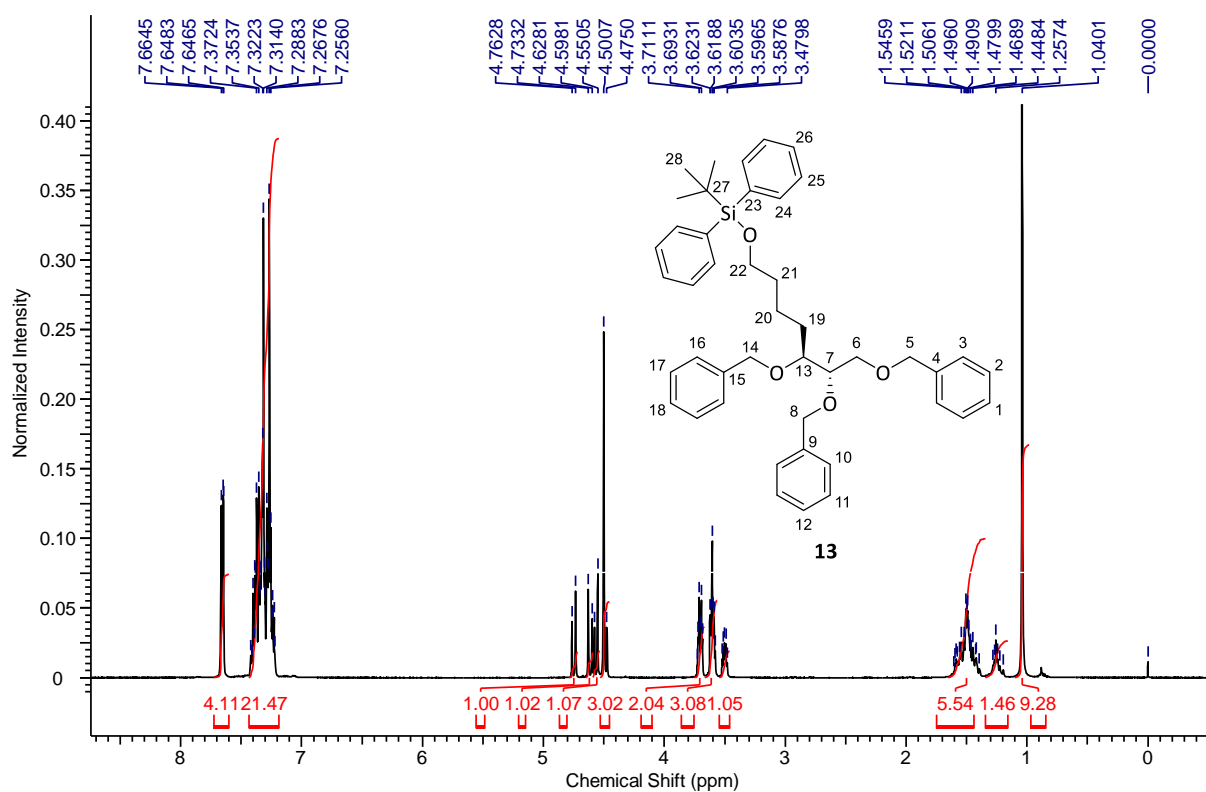

100 MHz, CDCl<sub>3</sub>

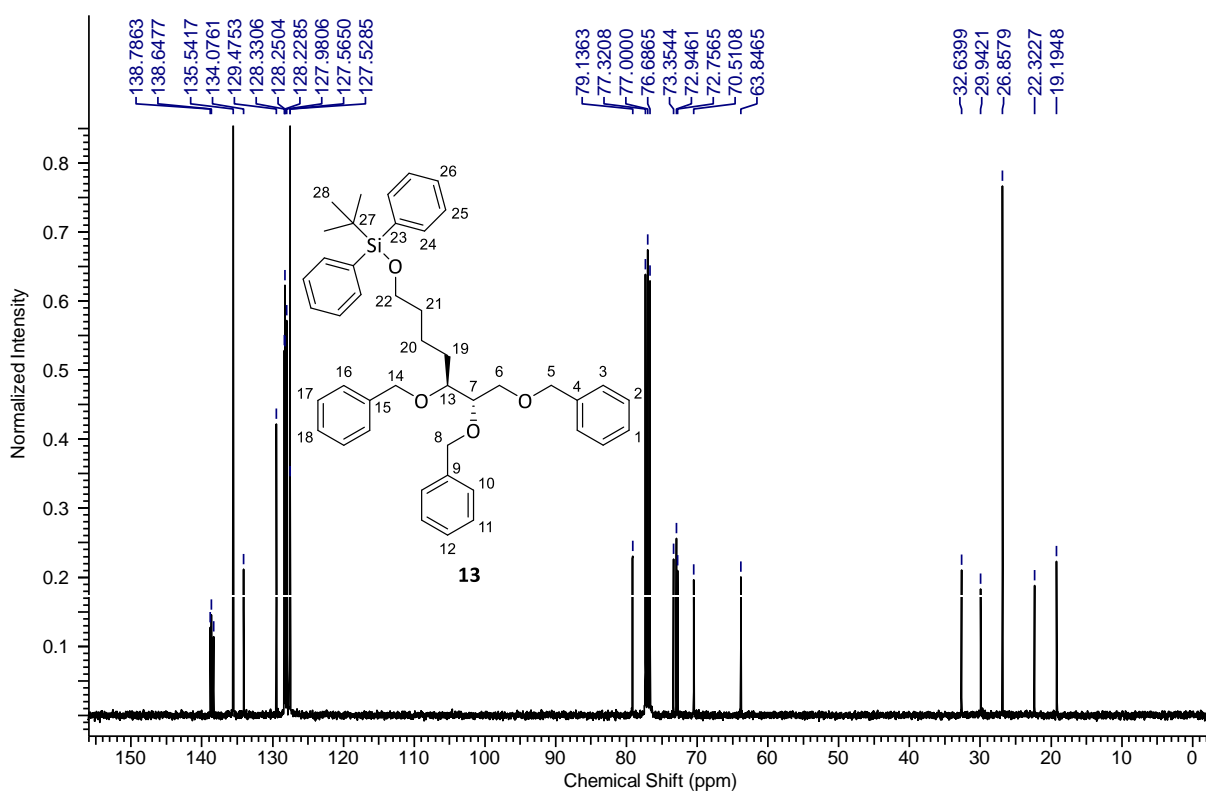

# (5S,6S)-5,6,7-Tris(benzyloxy)heptan-1-ol (14)

400 MHz, CDCl<sub>3</sub>

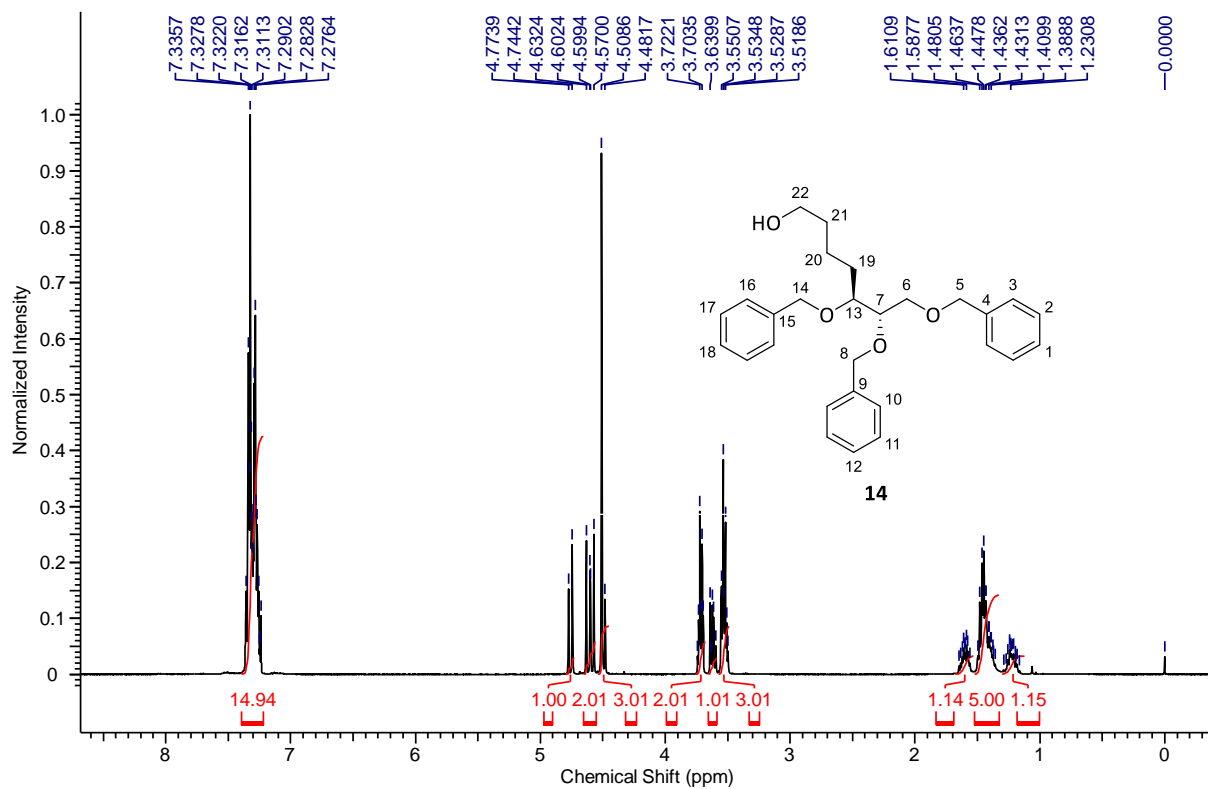

100 MHz, CDCl<sub>3</sub>

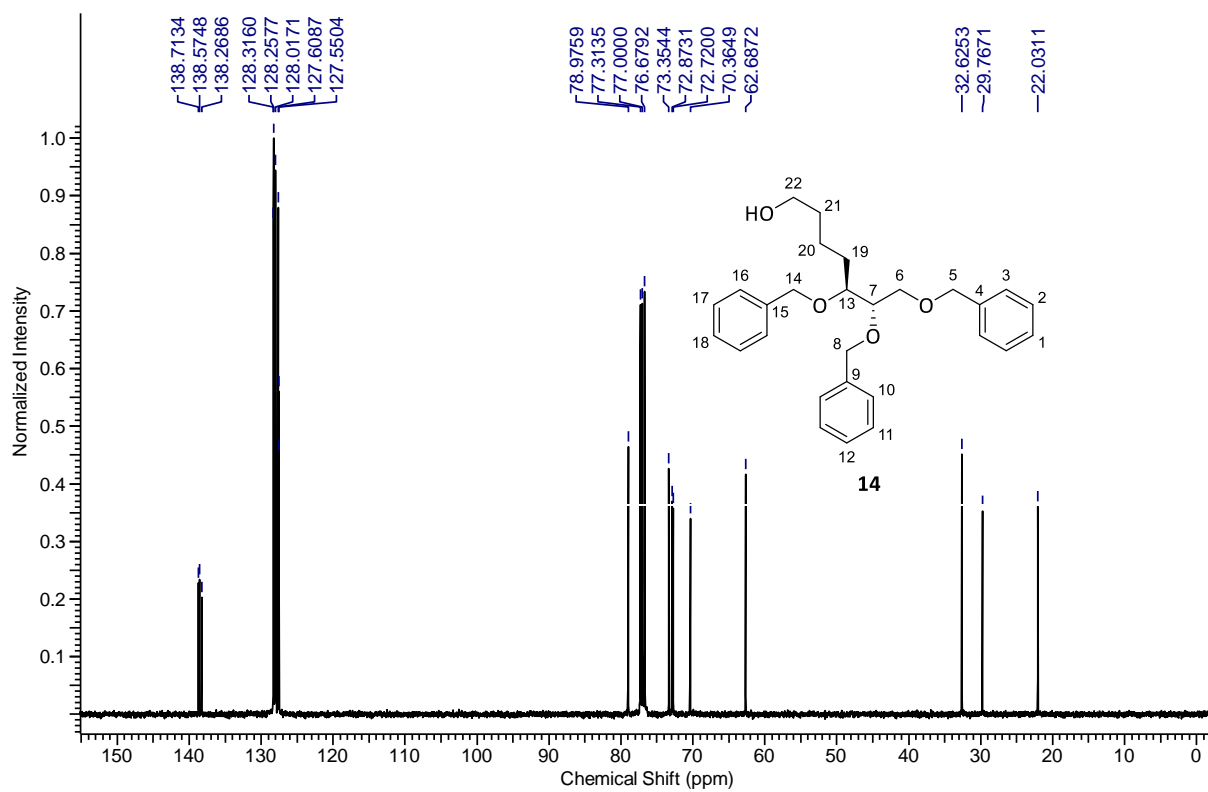

**{{[(2S,3S)-7-Iodoheptane-1,2,3-triyl]tris(oxy)}tris(methylene)}tribenzene (15)**

400 MHz, CDCl<sub>3</sub>

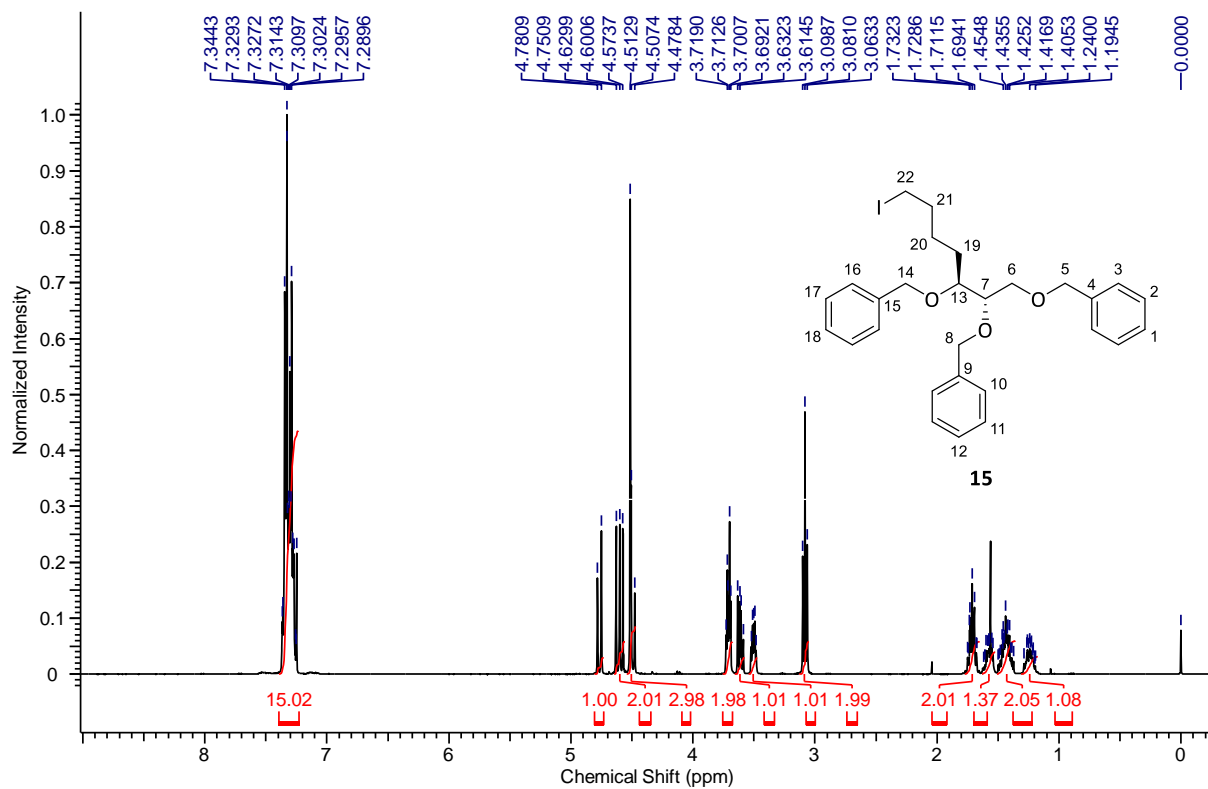

100 MHz, CDCl<sub>3</sub>

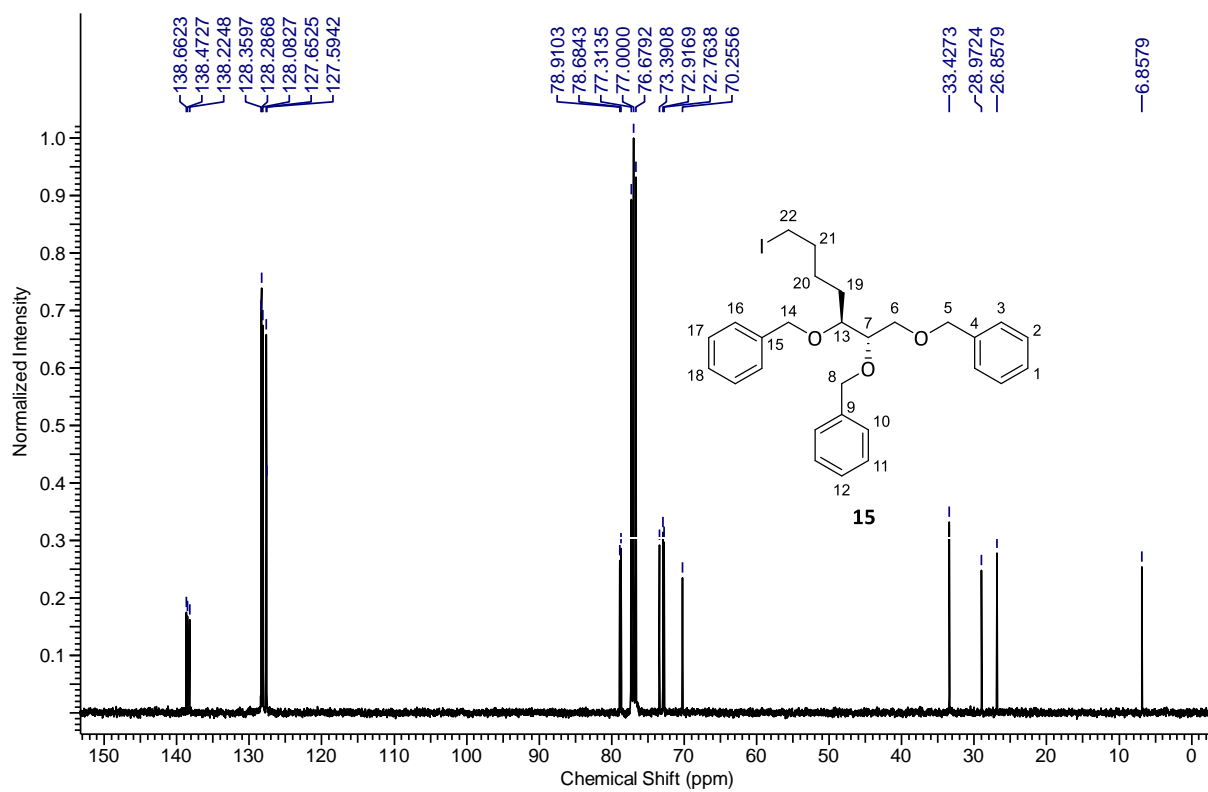



**(2S,8S,9S)-8,9,10-Tris(benzyloxy)-2-(1,3-dioxisoindolin-2-yl)-N-(quinolin-8-yl)decanamide (16)**

400 MHz, CDCl<sub>3</sub>

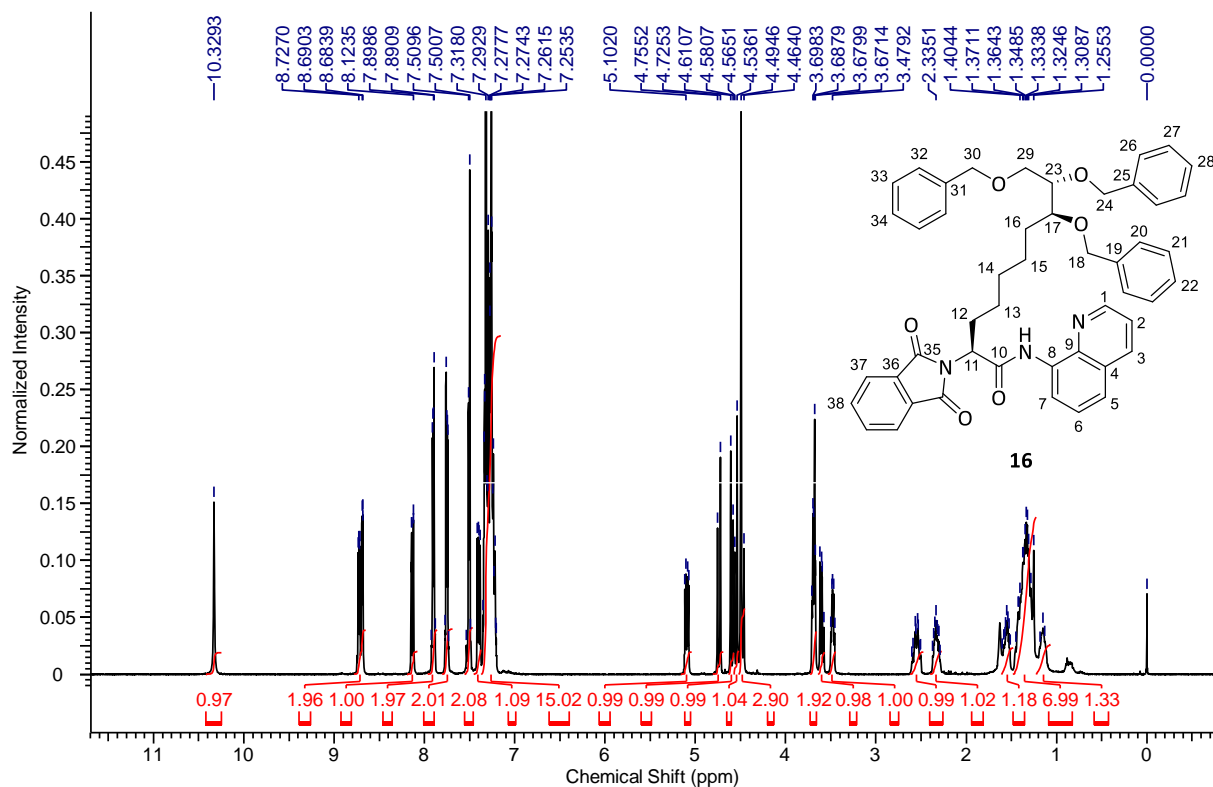

100 MHz, CDCl<sub>3</sub>

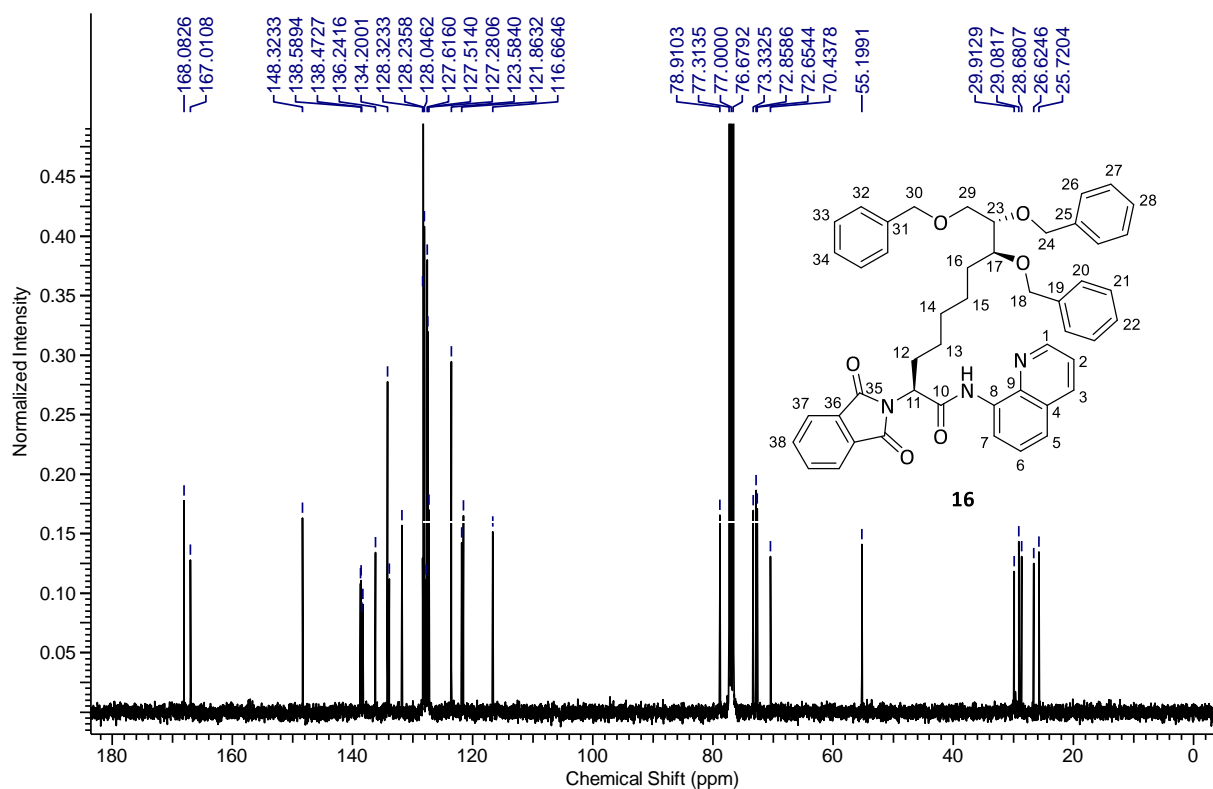

# (2S,8S,9S)-2-Amino-8,9,10-tris(benzyloxy)-N-(quinolin-8-yl)decanamide

400 MHz, CDCl<sub>3</sub>

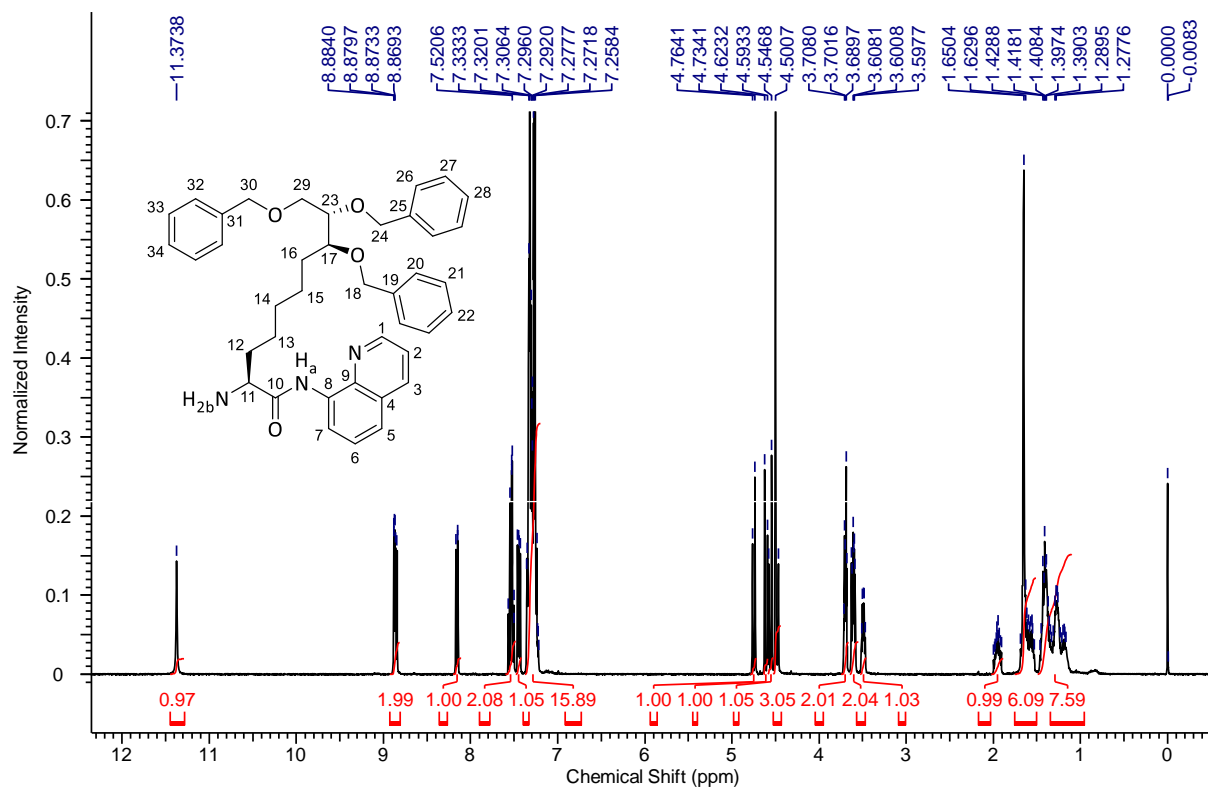

100 MHz, CDCl<sub>3</sub>

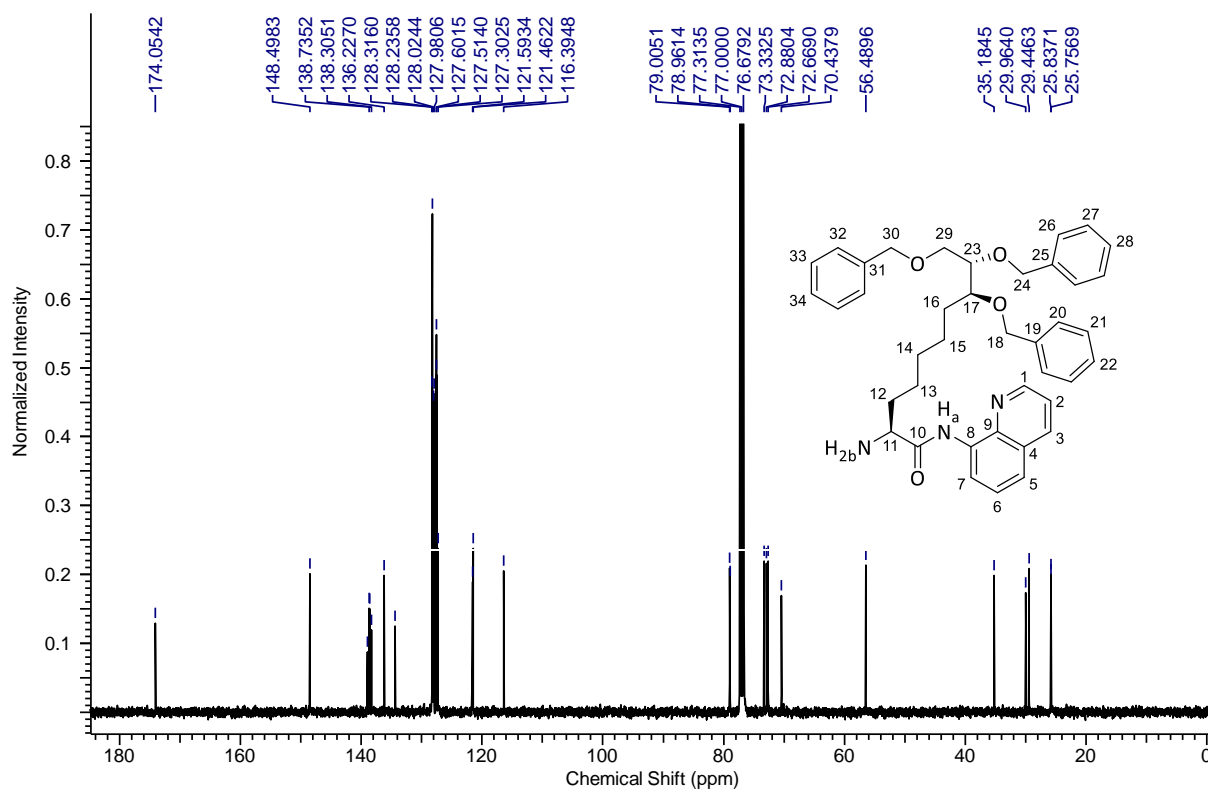

**(2*S*,8*S*,9*S*)-2-Azido-8,9,10-tris(benzyloxy)-*N*-(quinolin-8-yl)decanamide (17)**

400 MHz, CDCl<sub>3</sub>

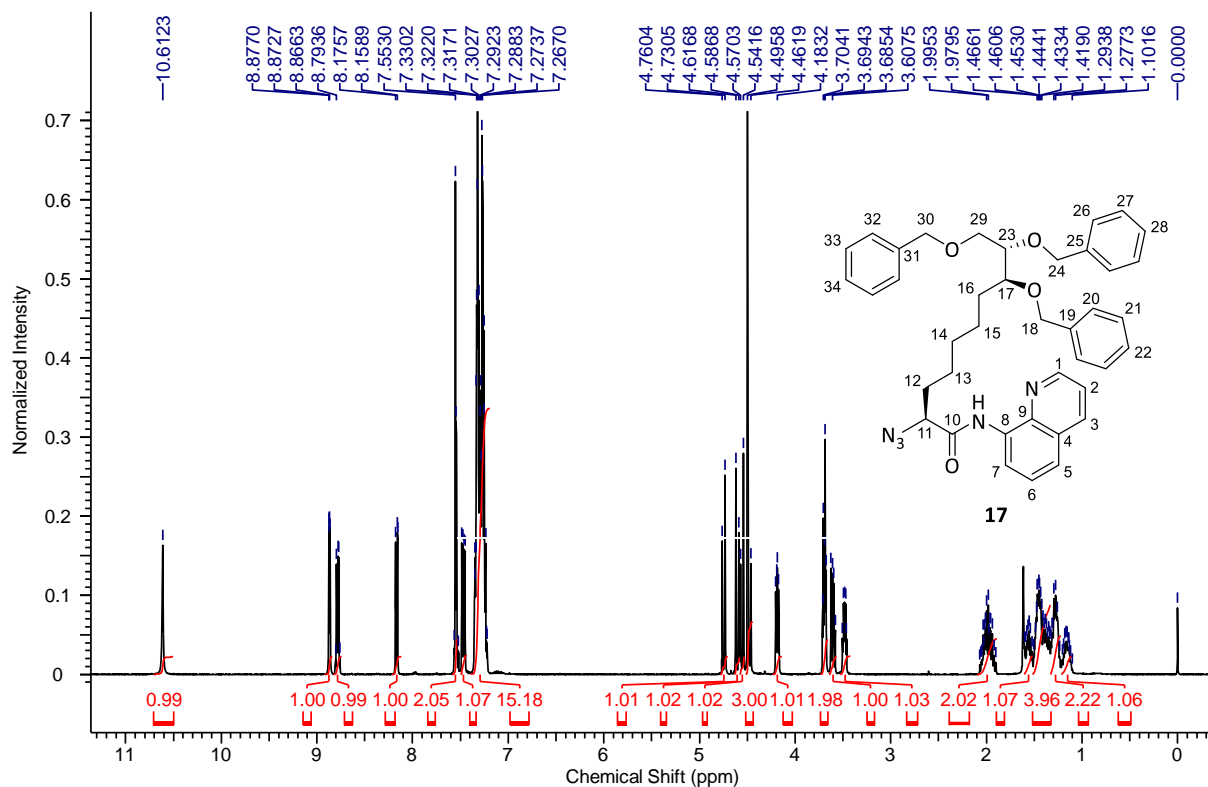

100 MHz, CDCl<sub>3</sub>

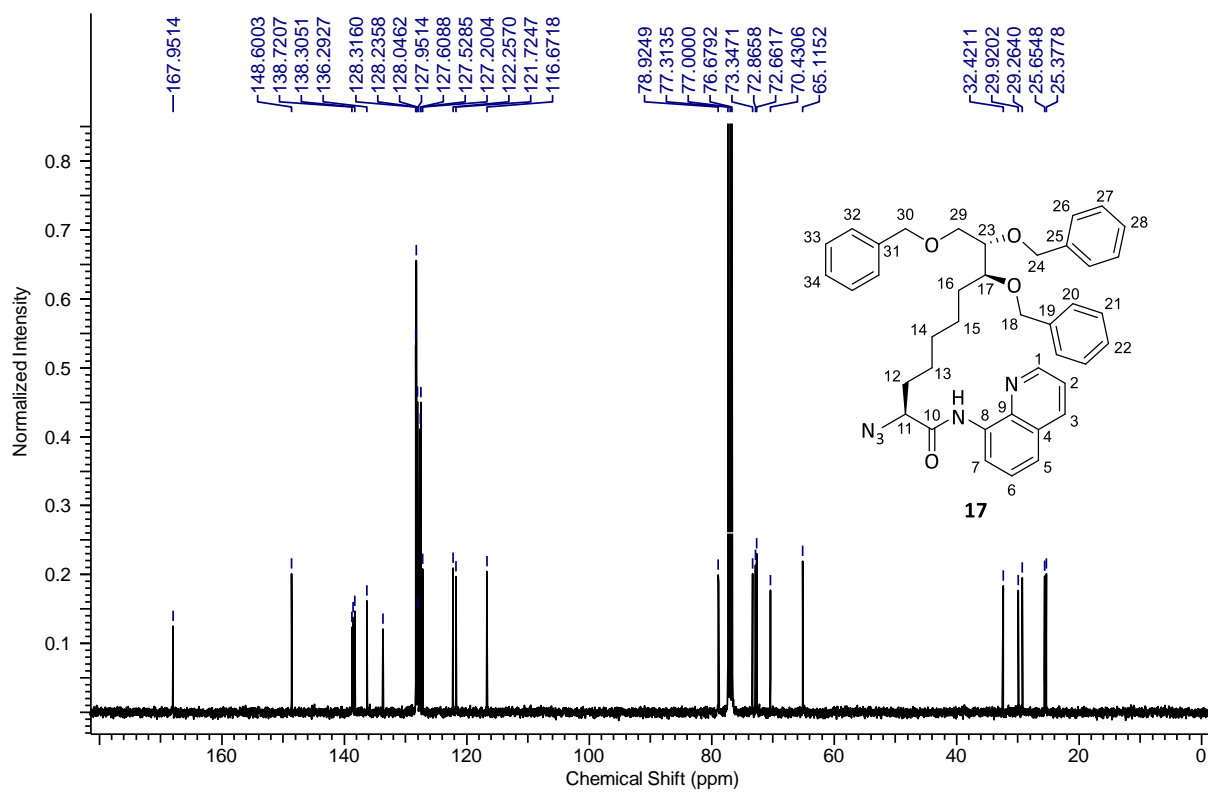

# (2S,8S,9S)-2-Azido-8,9,10-tris(benzyloxy)decanoic acid

400 MHz, CDCl<sub>3</sub>

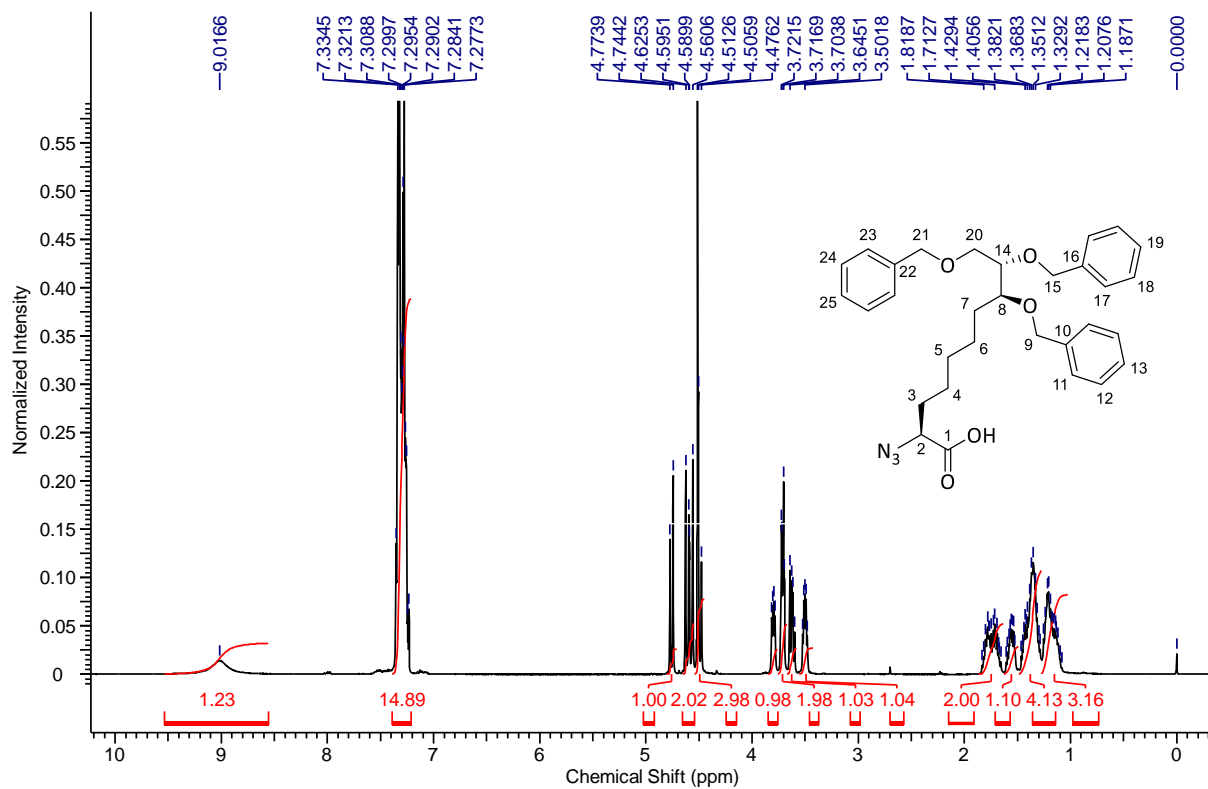

100 MHz, CDCl<sub>3</sub>

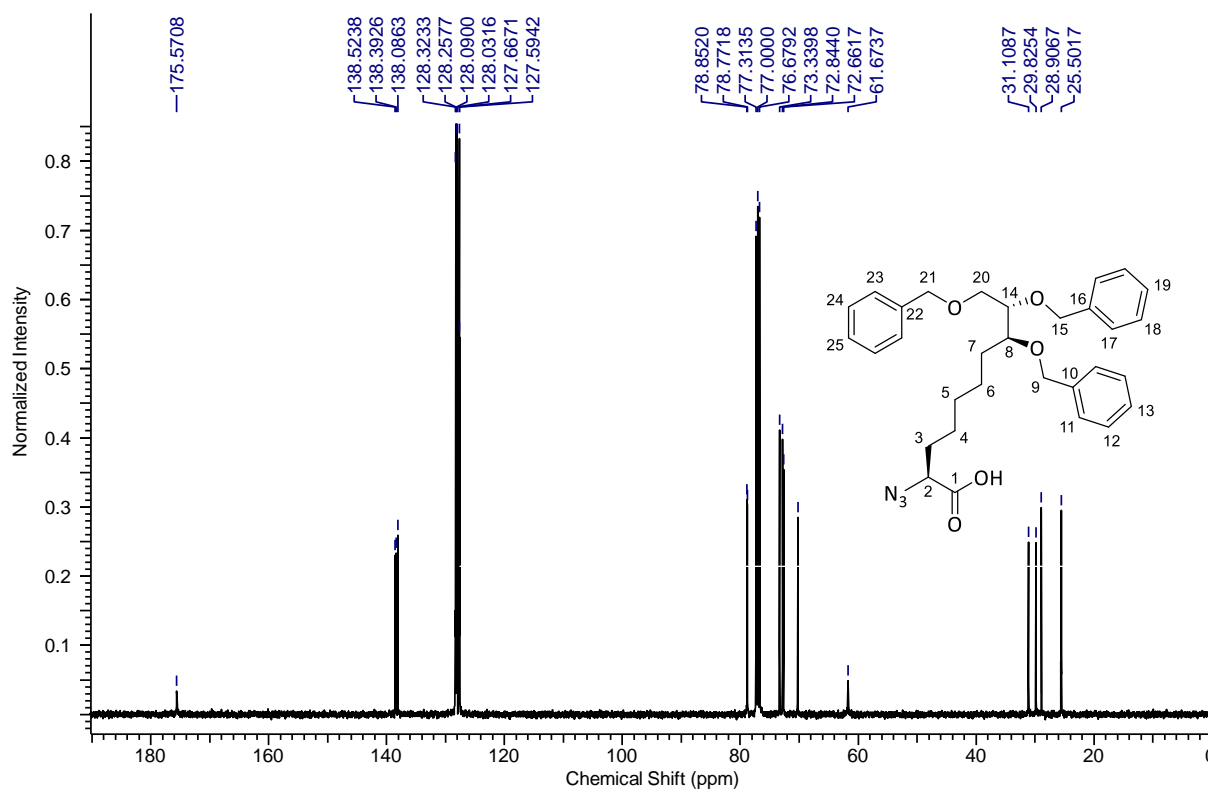

# Methyl (2S,8S,9S)-2-azido-8,9,10-tris(benzyloxy)decanoate (**18**)

400 MHz, CDCl<sub>3</sub>

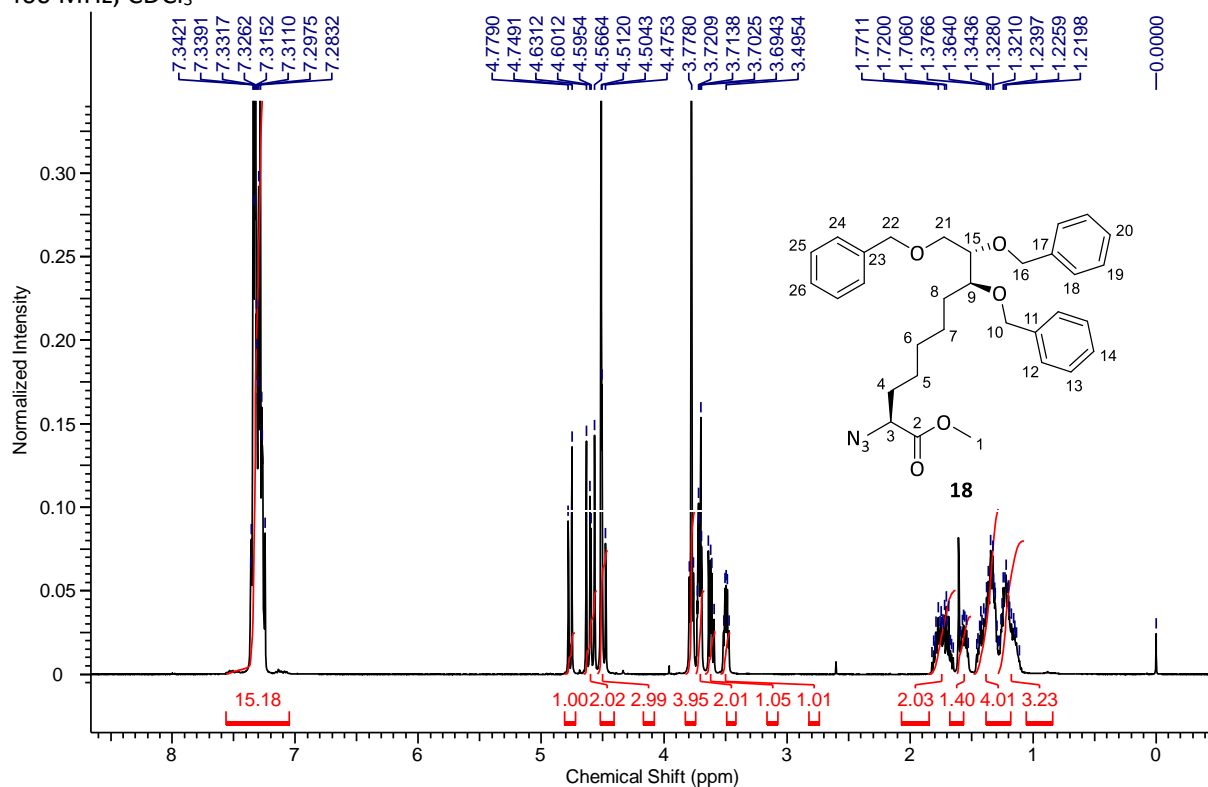

100 MHz, CDCl<sub>3</sub>

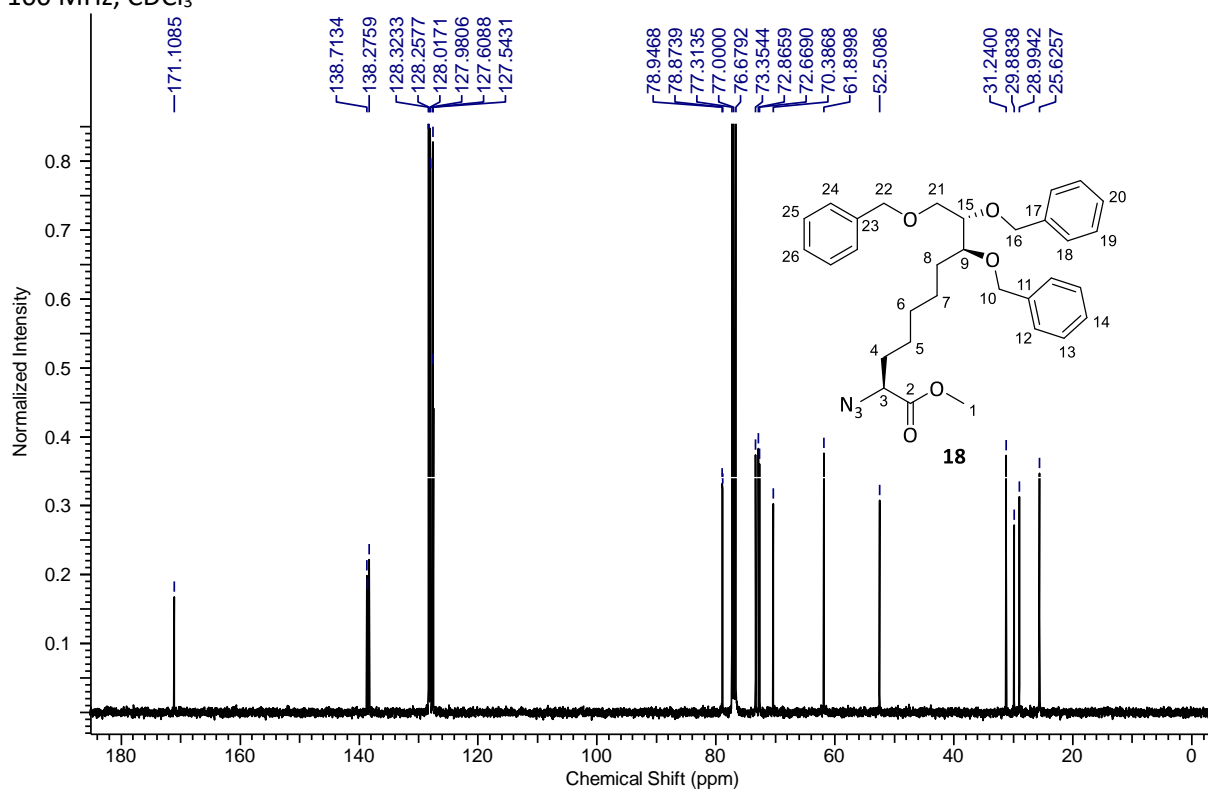

***tert*-Butyl (S)-2-[[[(2S,8S,9S)-8,9,10-tris(benzyloxy)-1-methoxy-1-oxodecan-2-yl]carbamoyl]-piperidine-1-carboxylate (19)**

400 MHz, CDCl<sub>3</sub>

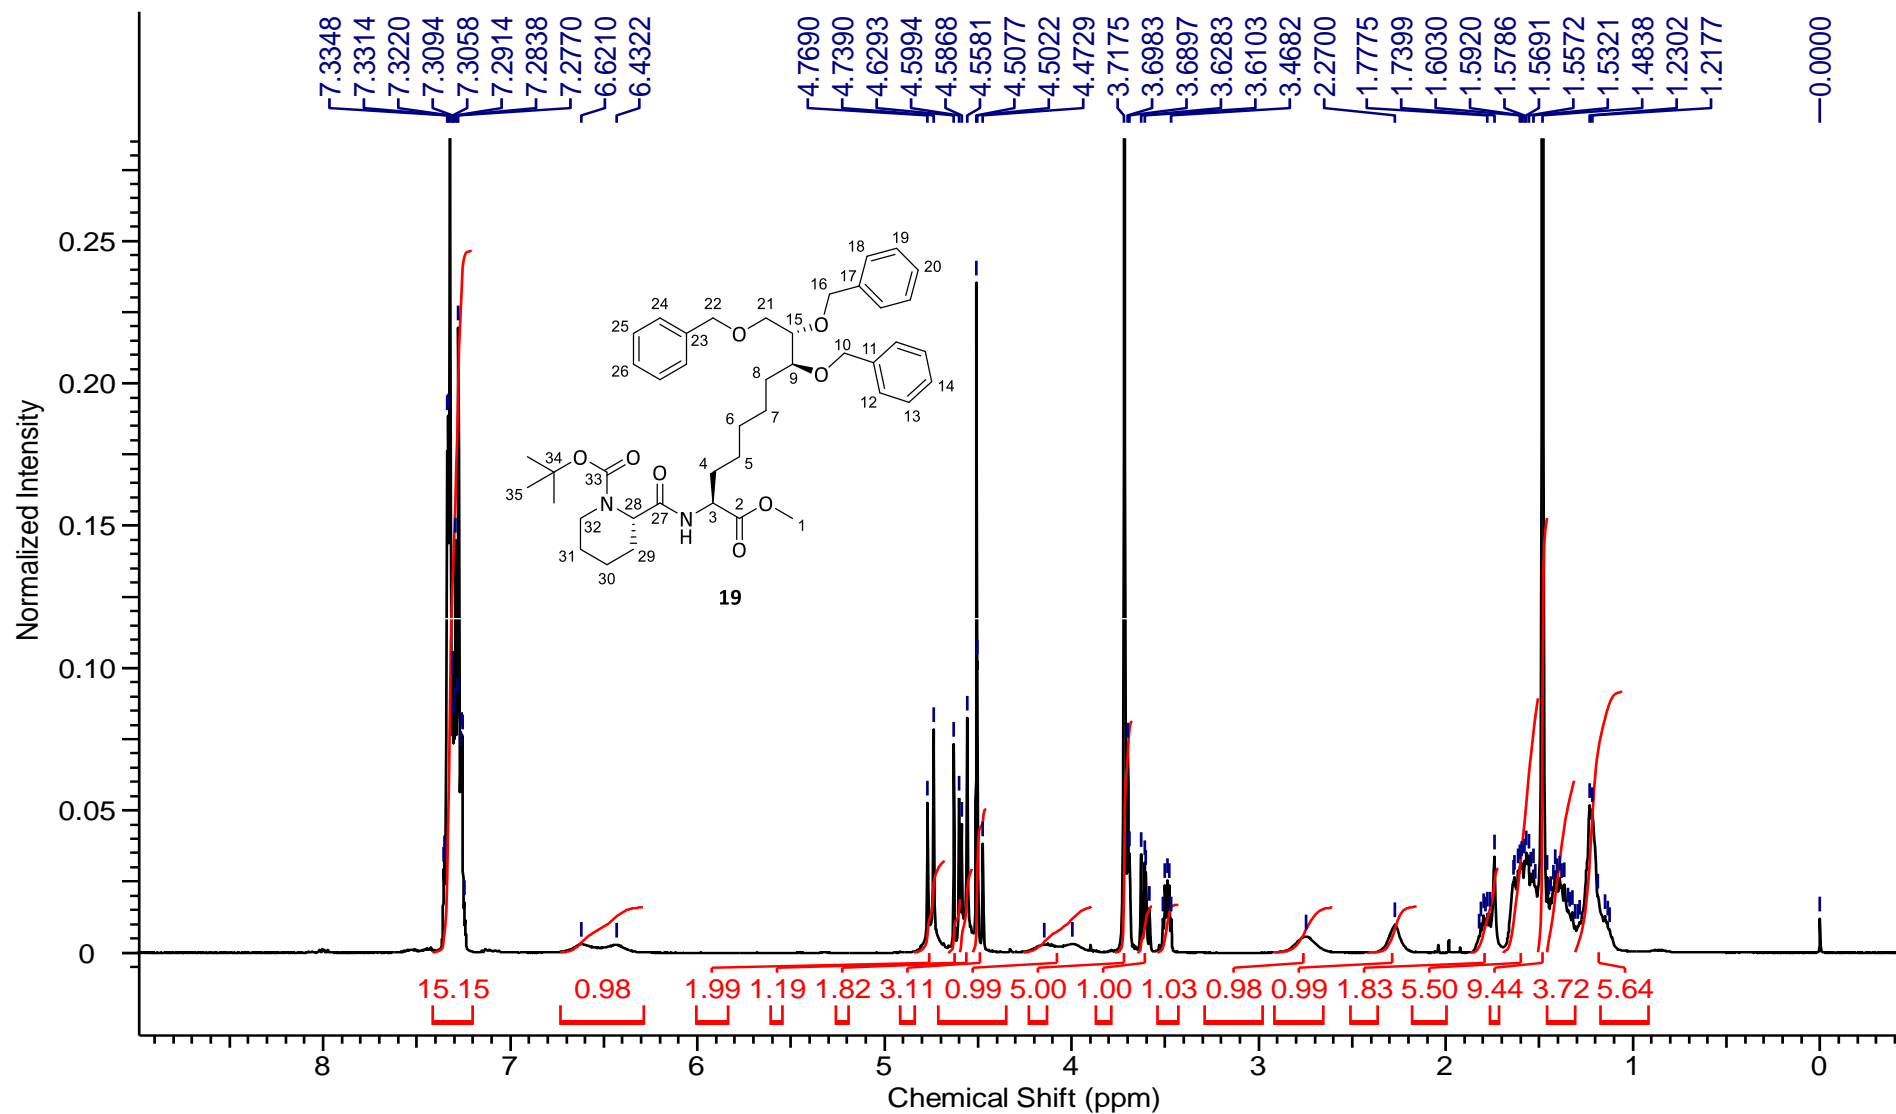

100 MHz, CDCl<sub>3</sub>

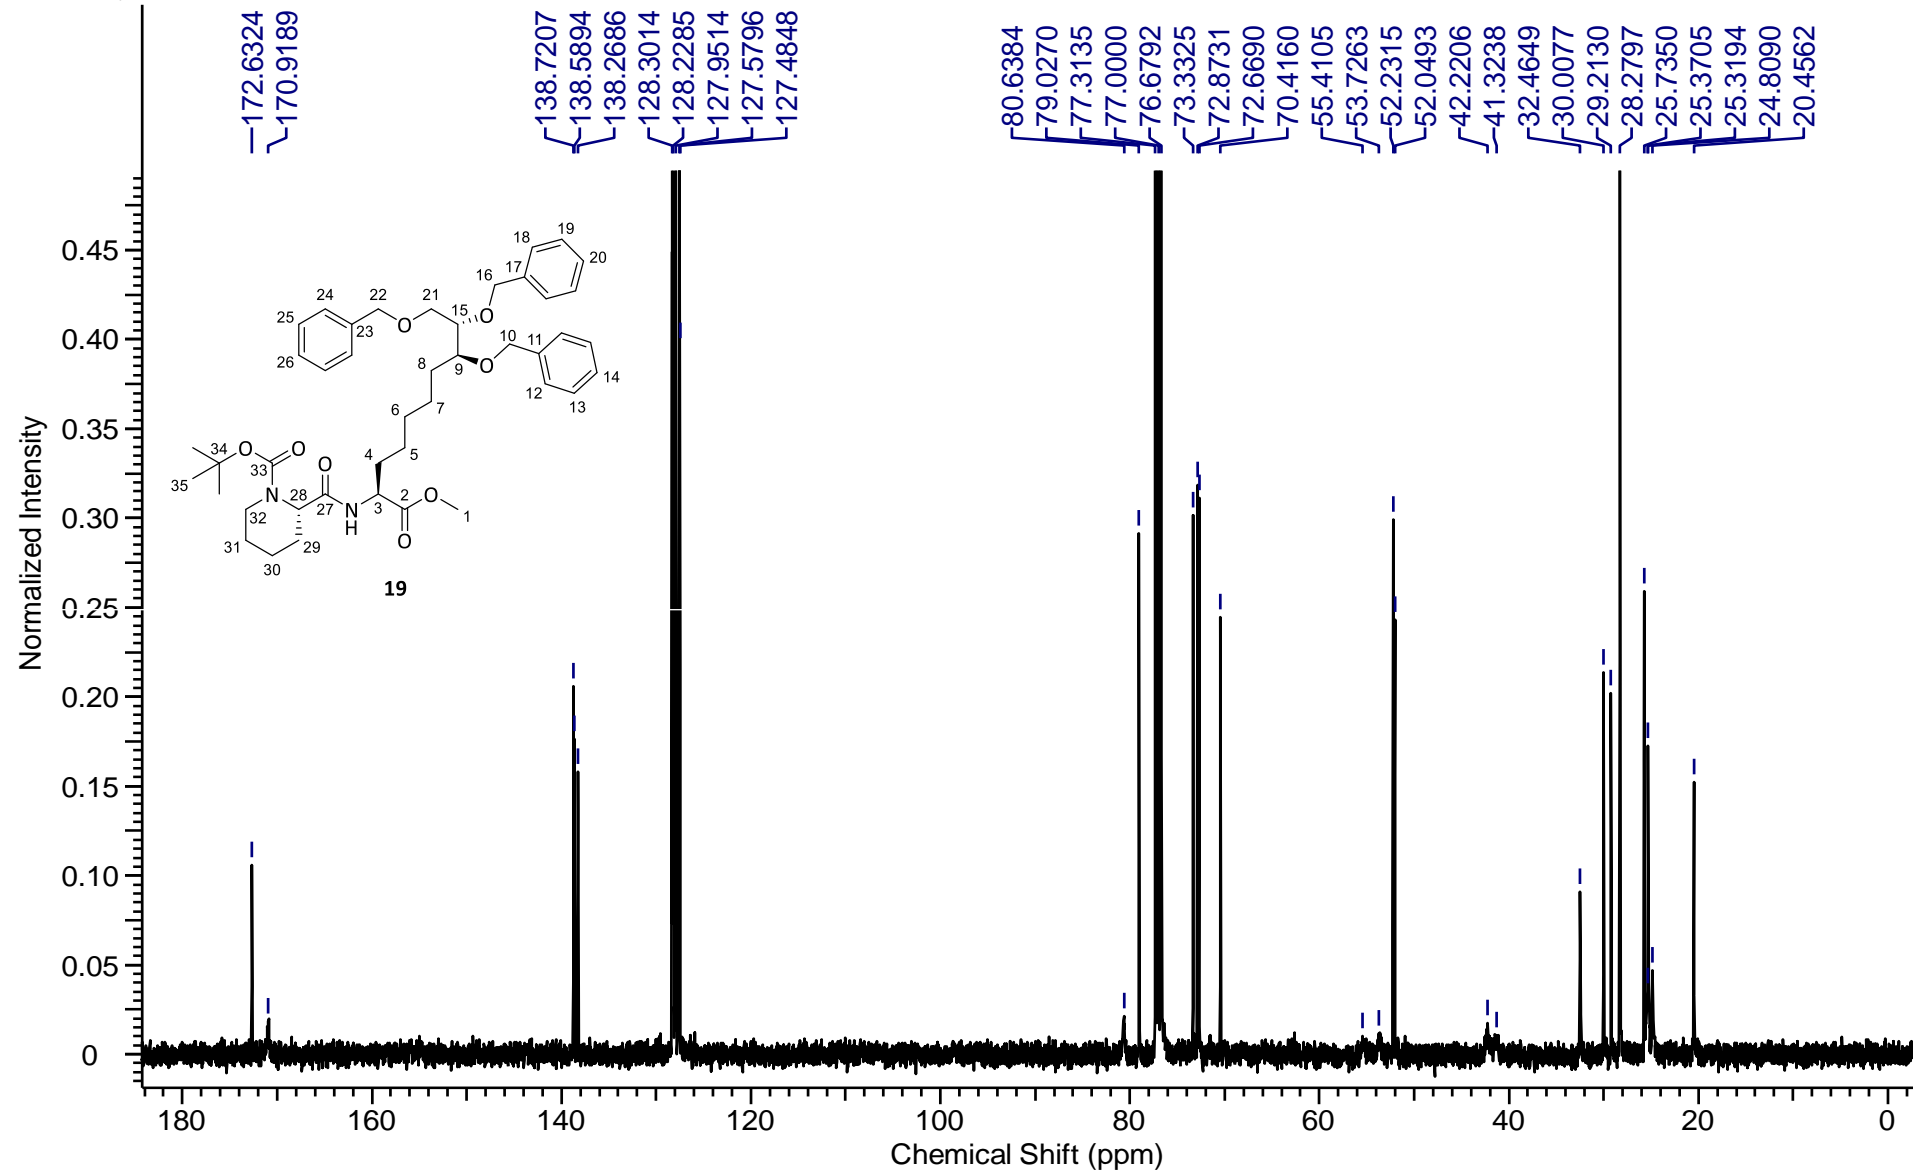

Methyl (2S,8S,9S)-8,9,10-tris(benzyloxy)-2-((S)-1-[(tert-butoxycarbonyl)-L-leucyl]piperidine-2-carboxamido)decanoate (20)

400 MHz, CDCl<sub>3</sub>

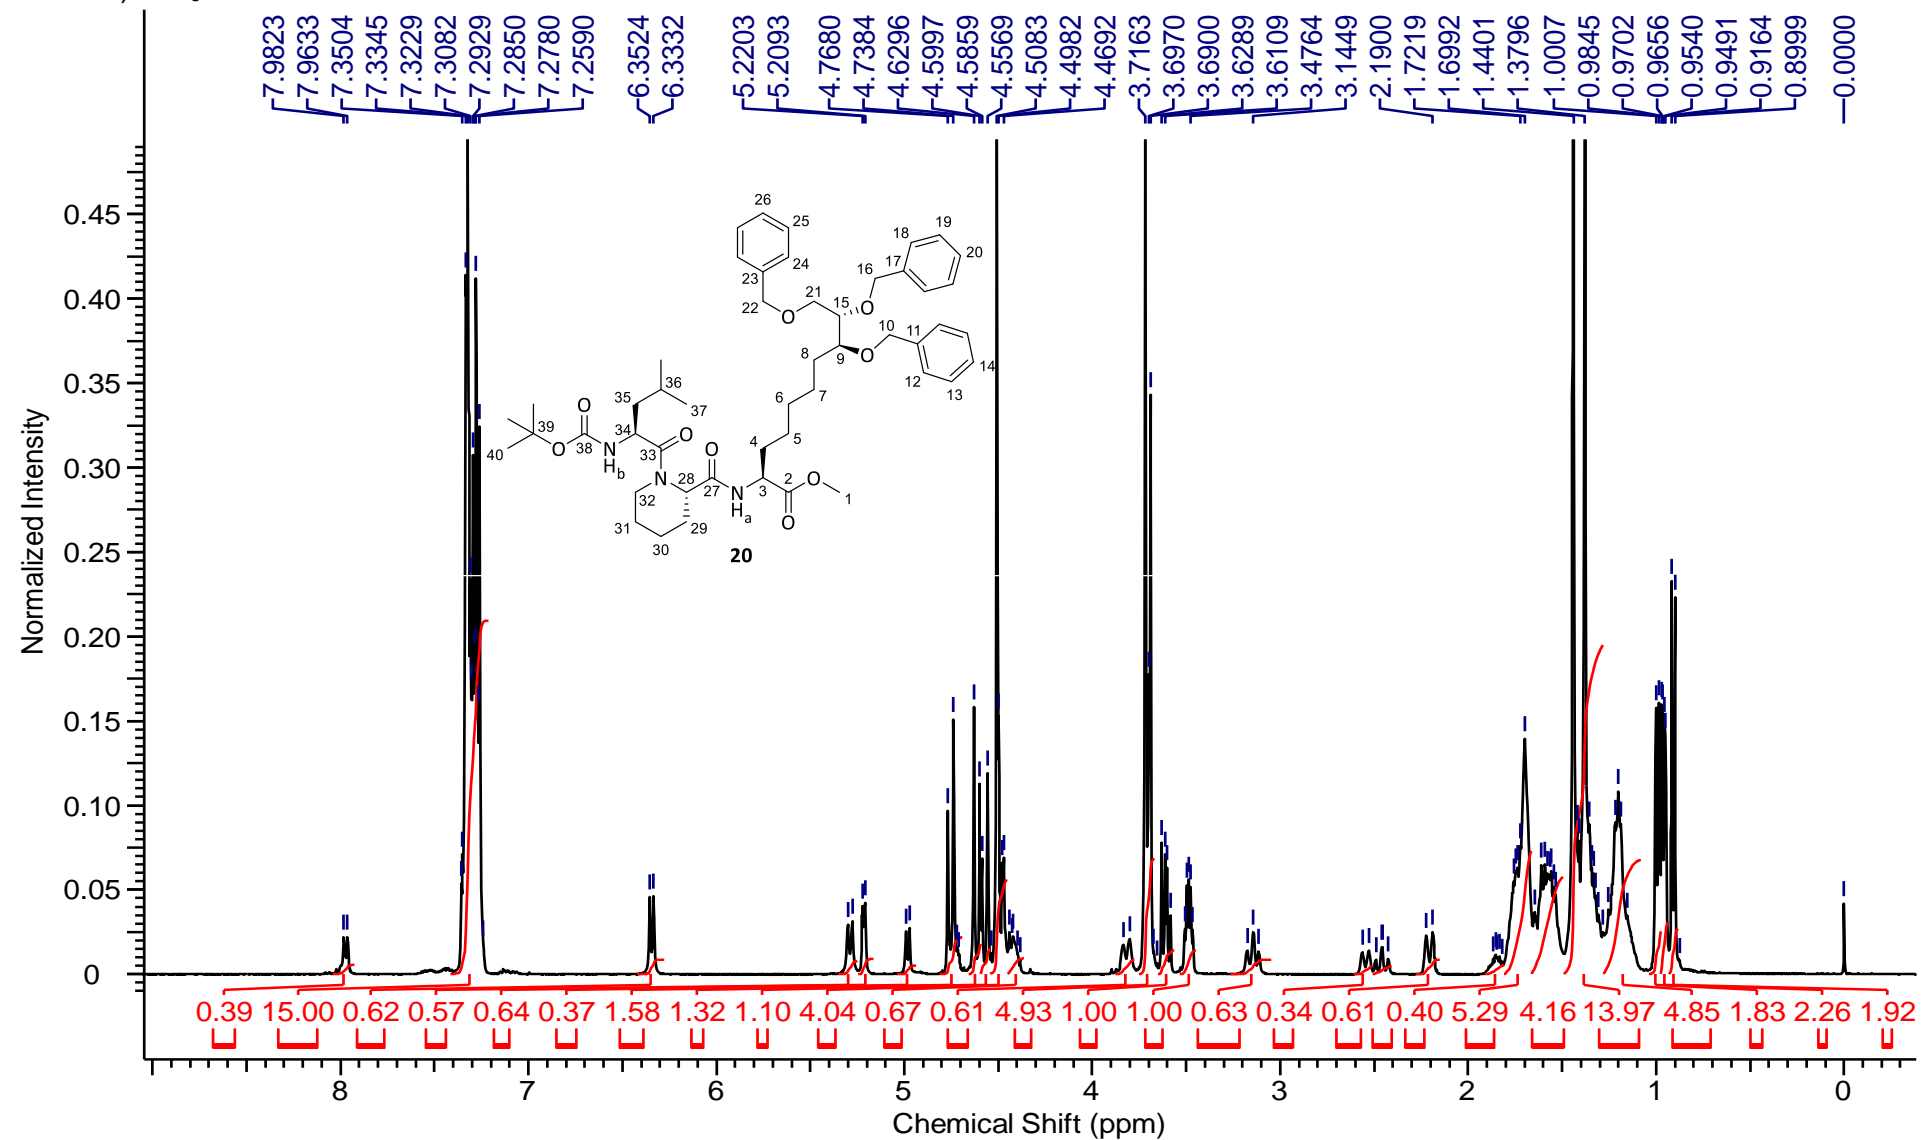



100 MHz, CDCl<sub>3</sub>

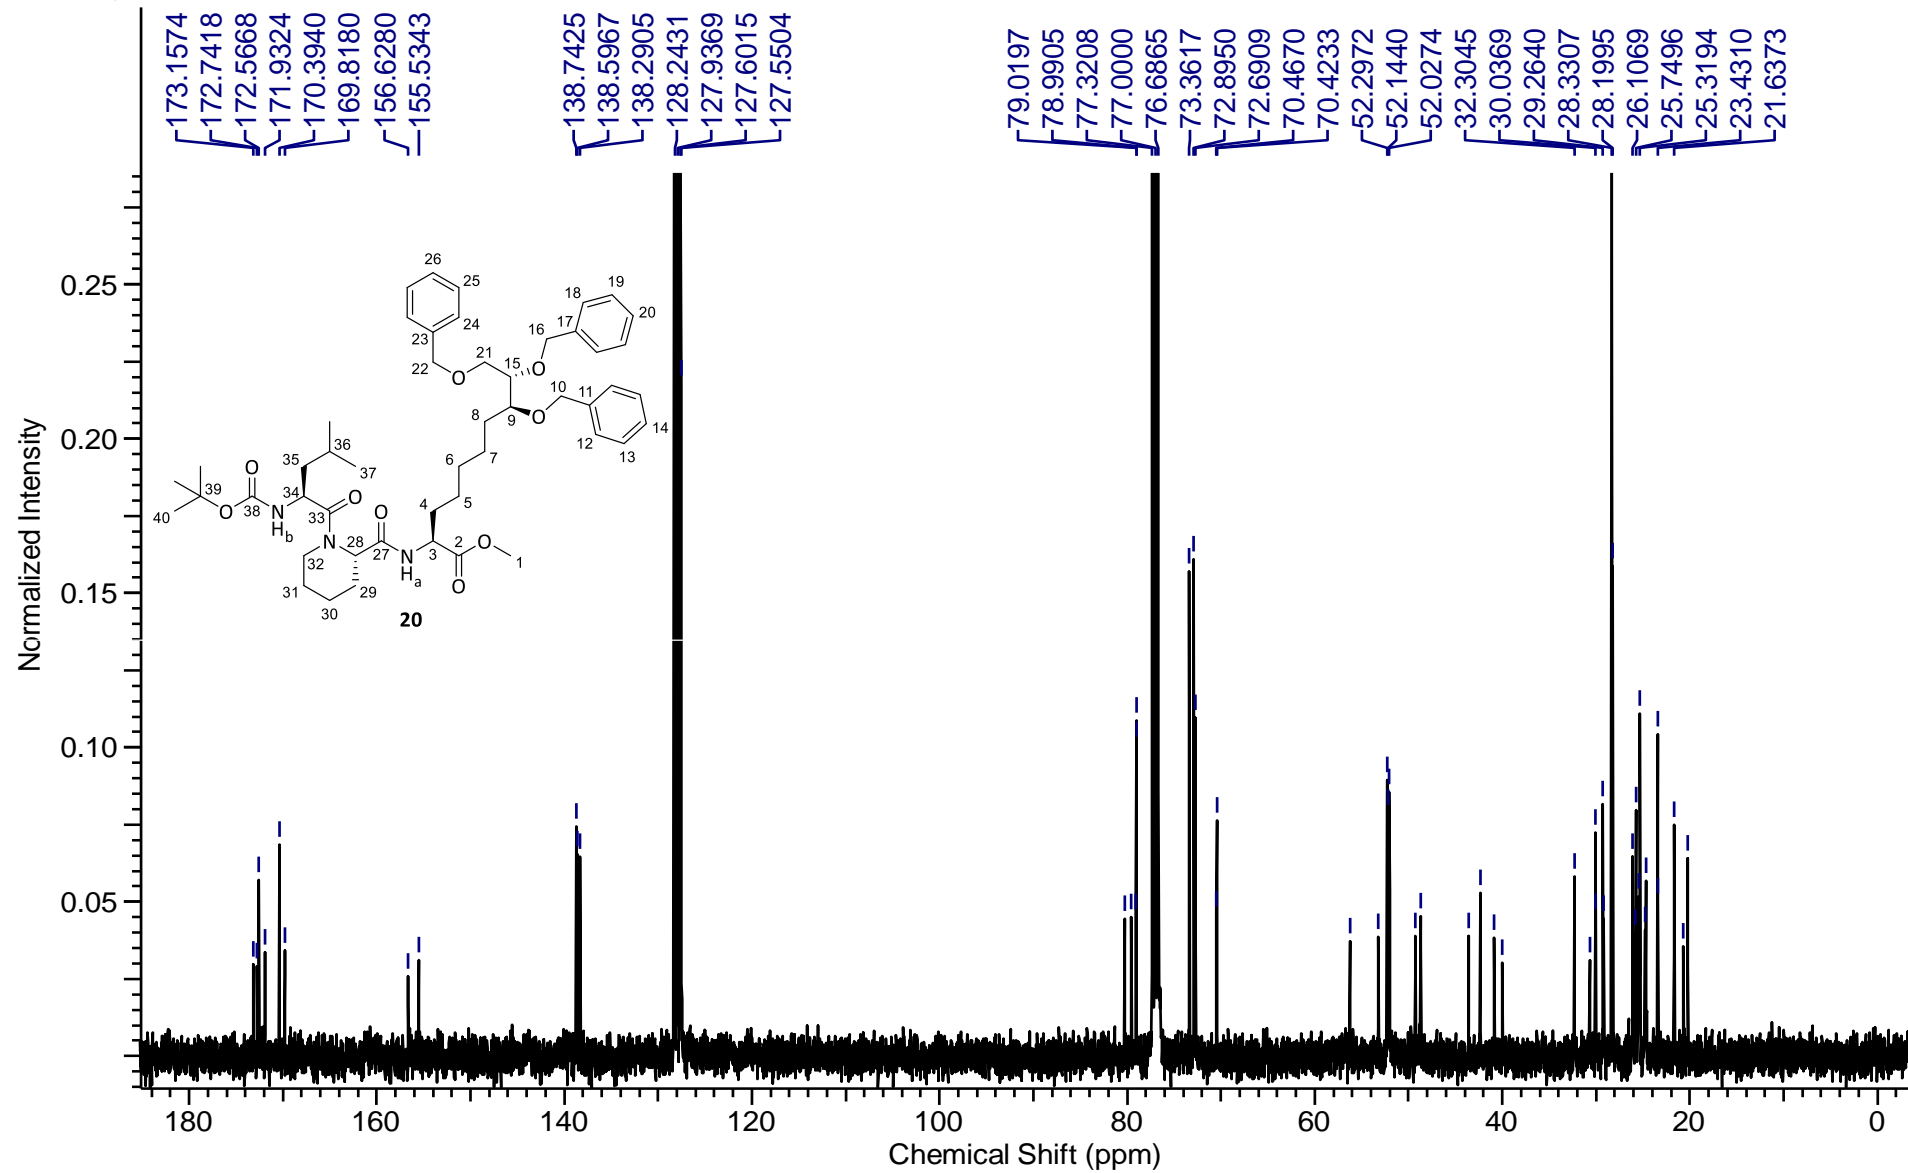

Methyl (2S,8S,9S)-8,9,10-tris(benzyloxy)-2-[(S)-1-[(tert-butoxycarbonyl)-D-phenylalanyl-L-leucyl]piperidine-2-carboxamido]decanoate (21)

500 MHz, DMSO-d<sub>6</sub>, 373 K

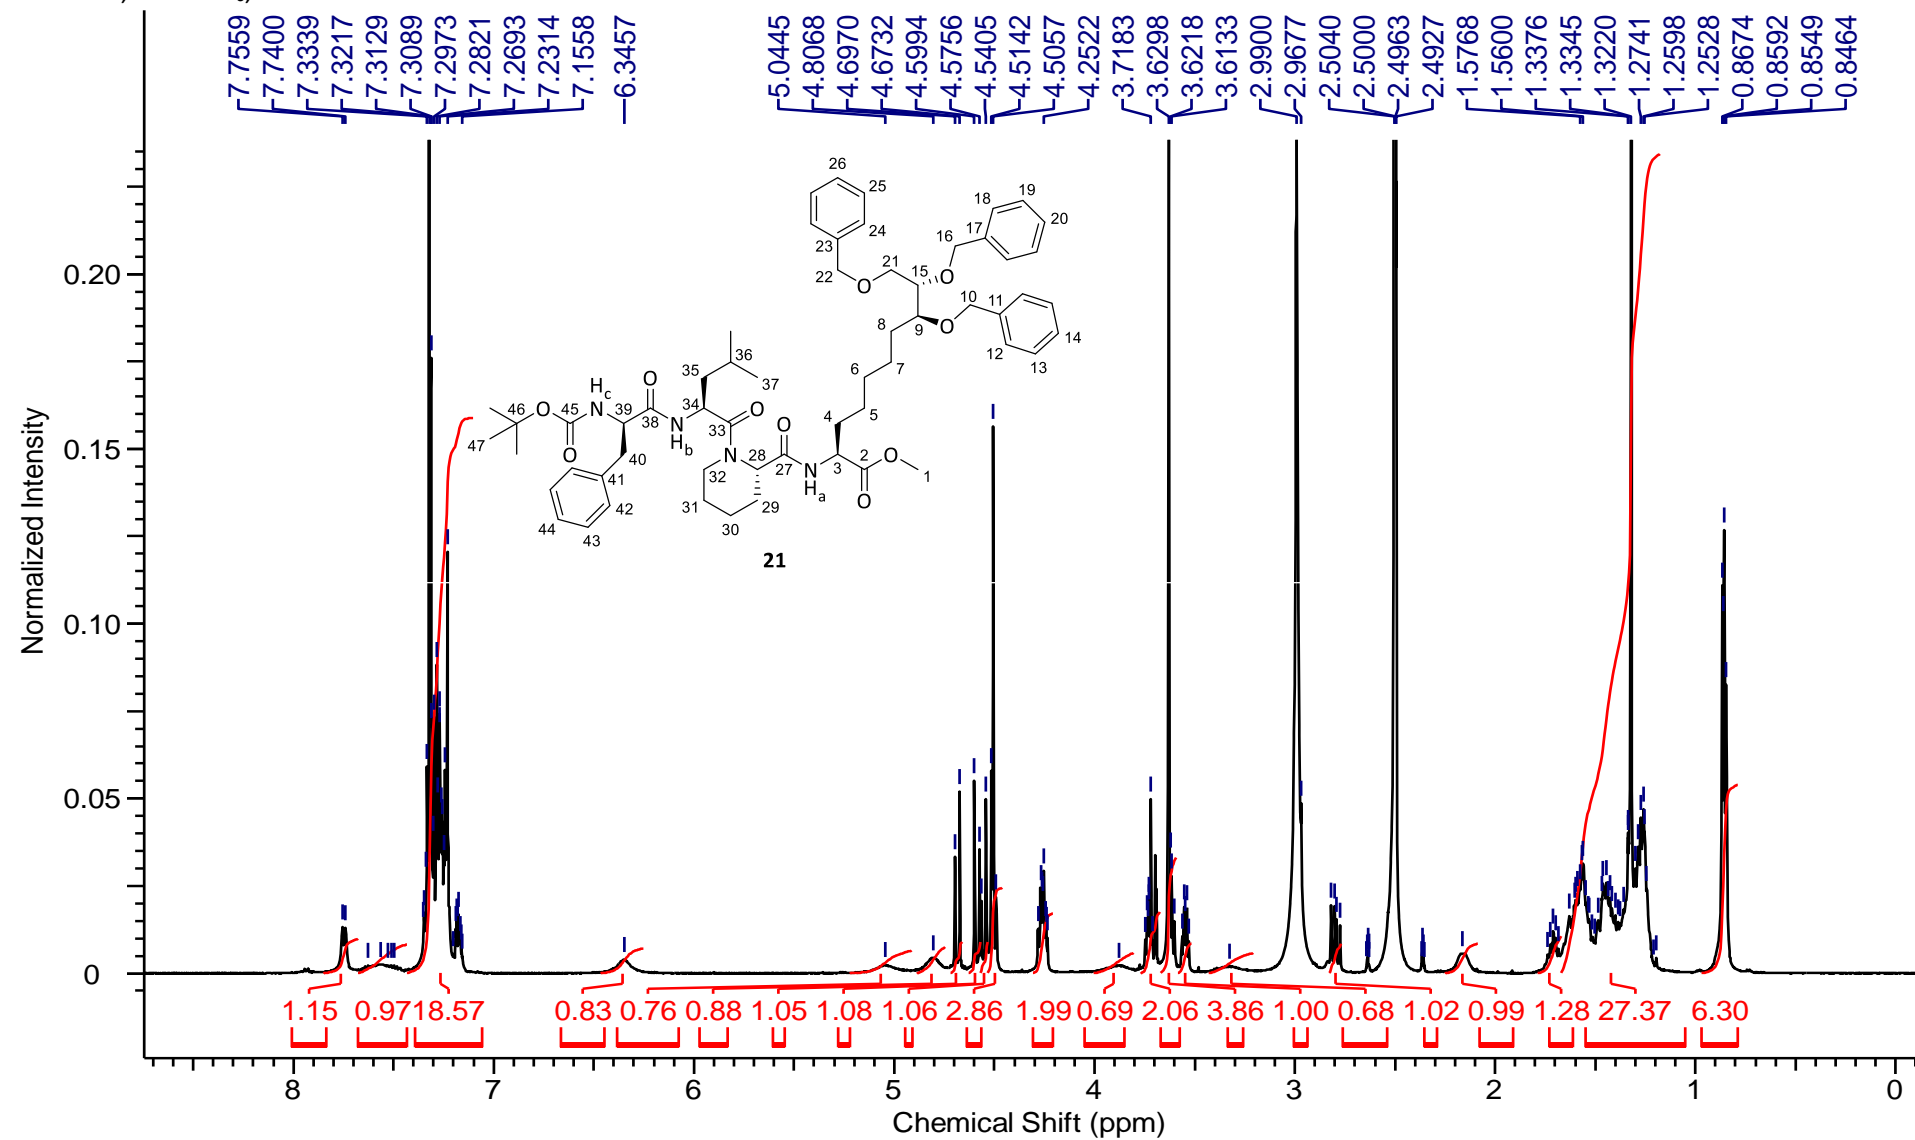

100 MHz, CDCl<sub>3</sub>

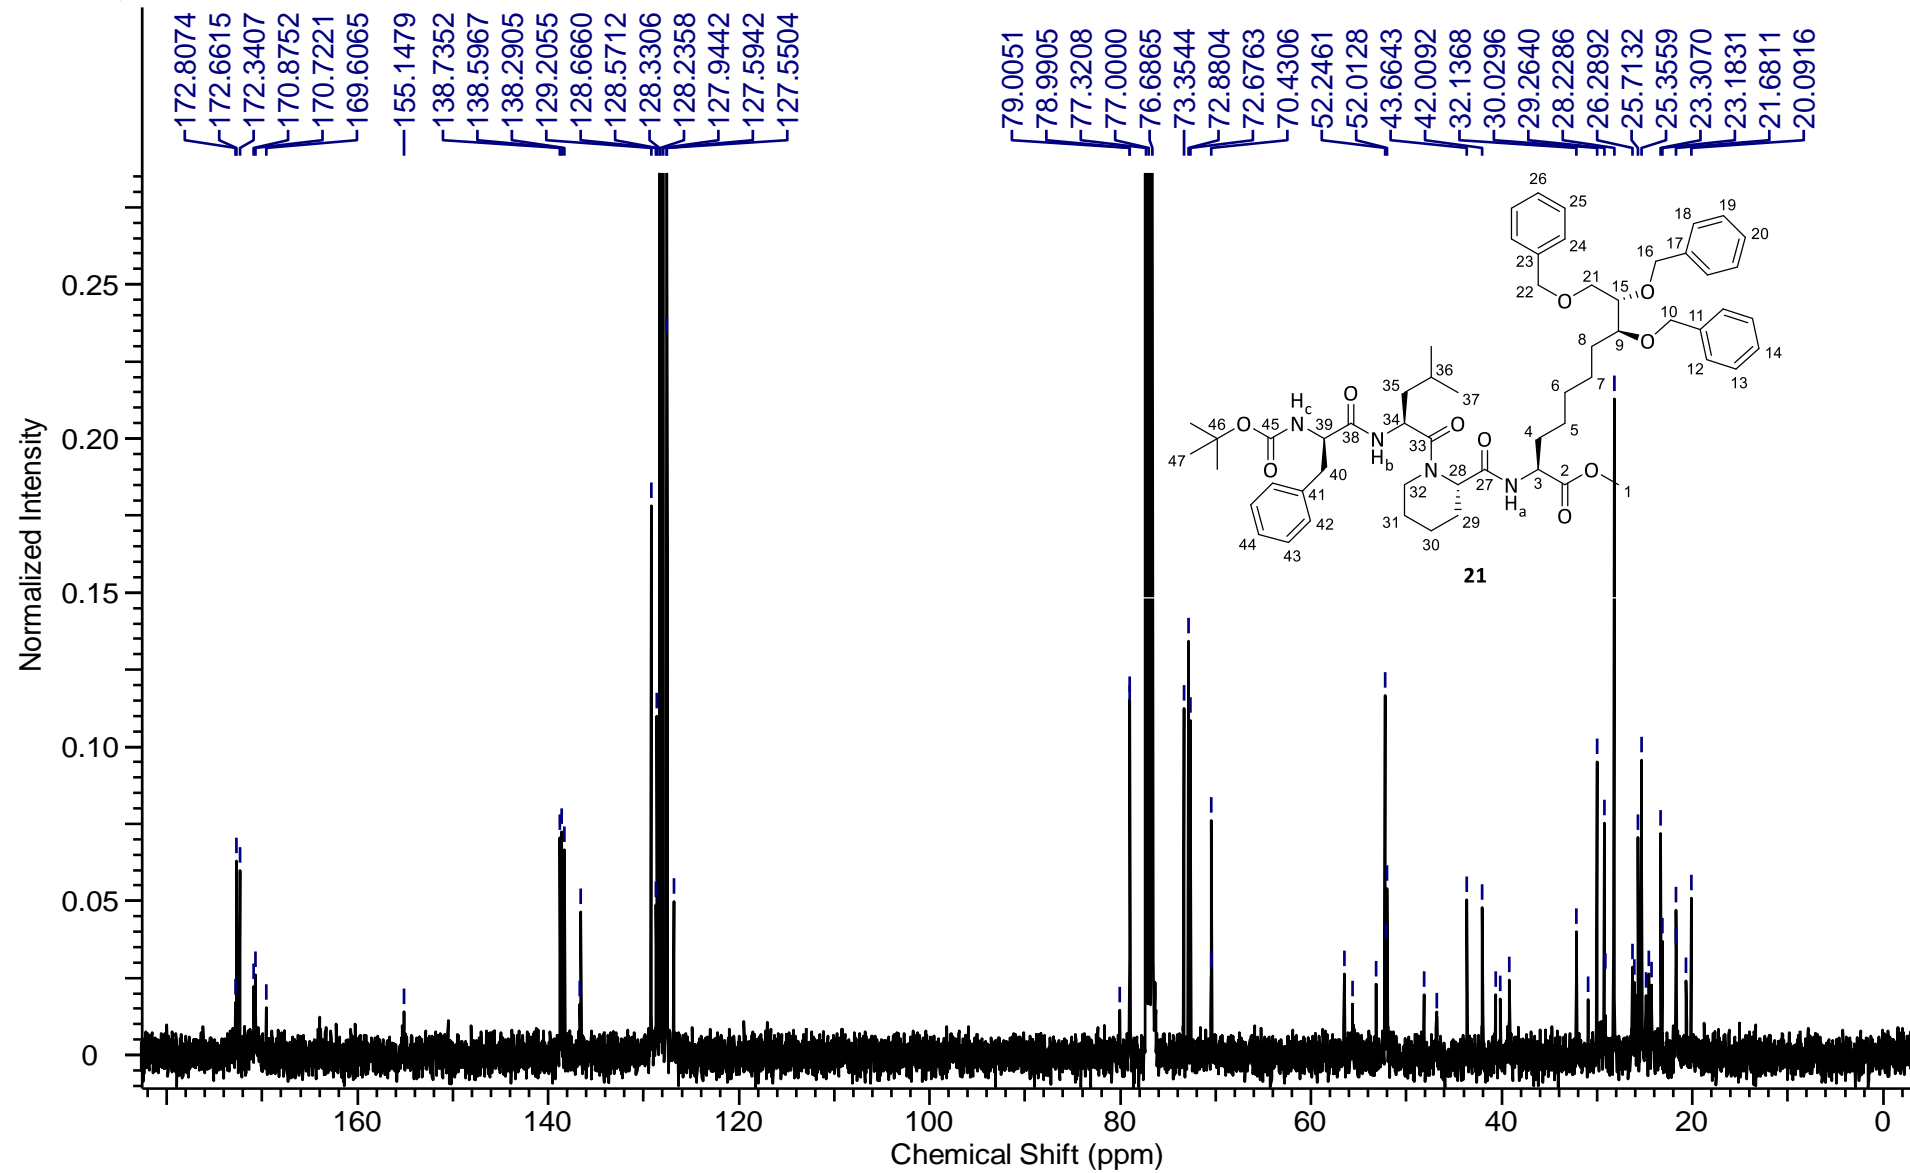

**(2S,8S,9S)-8,9,10-Tris(benzyloxy)-2-((S)-1-[(tert-butoxycarbonyl)-D-phenylalanyl-L-leucyl]piperidine-2-carboxamido)decanoic acid**

500 MHz, DMSO-d<sub>6</sub>, 373 K

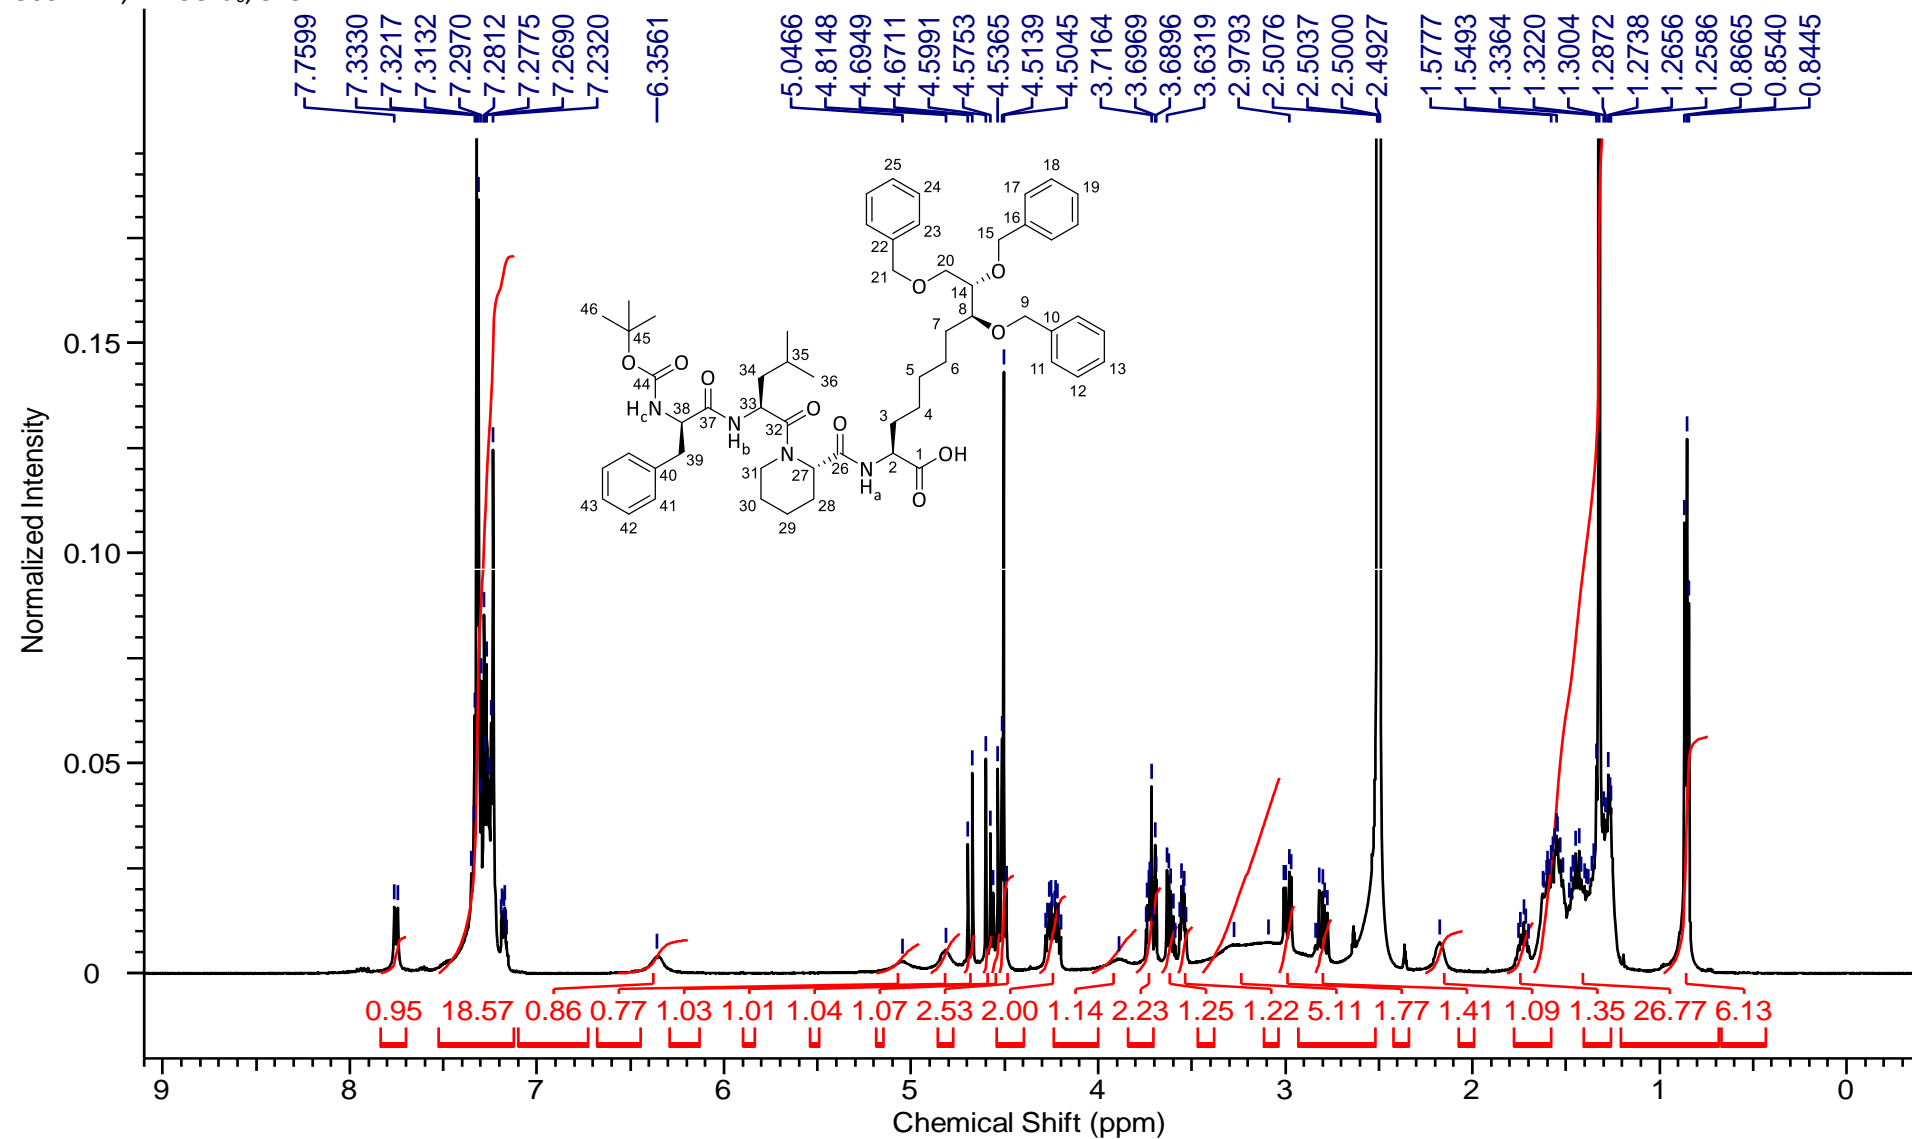

100 MHz, CDCl<sub>3</sub>

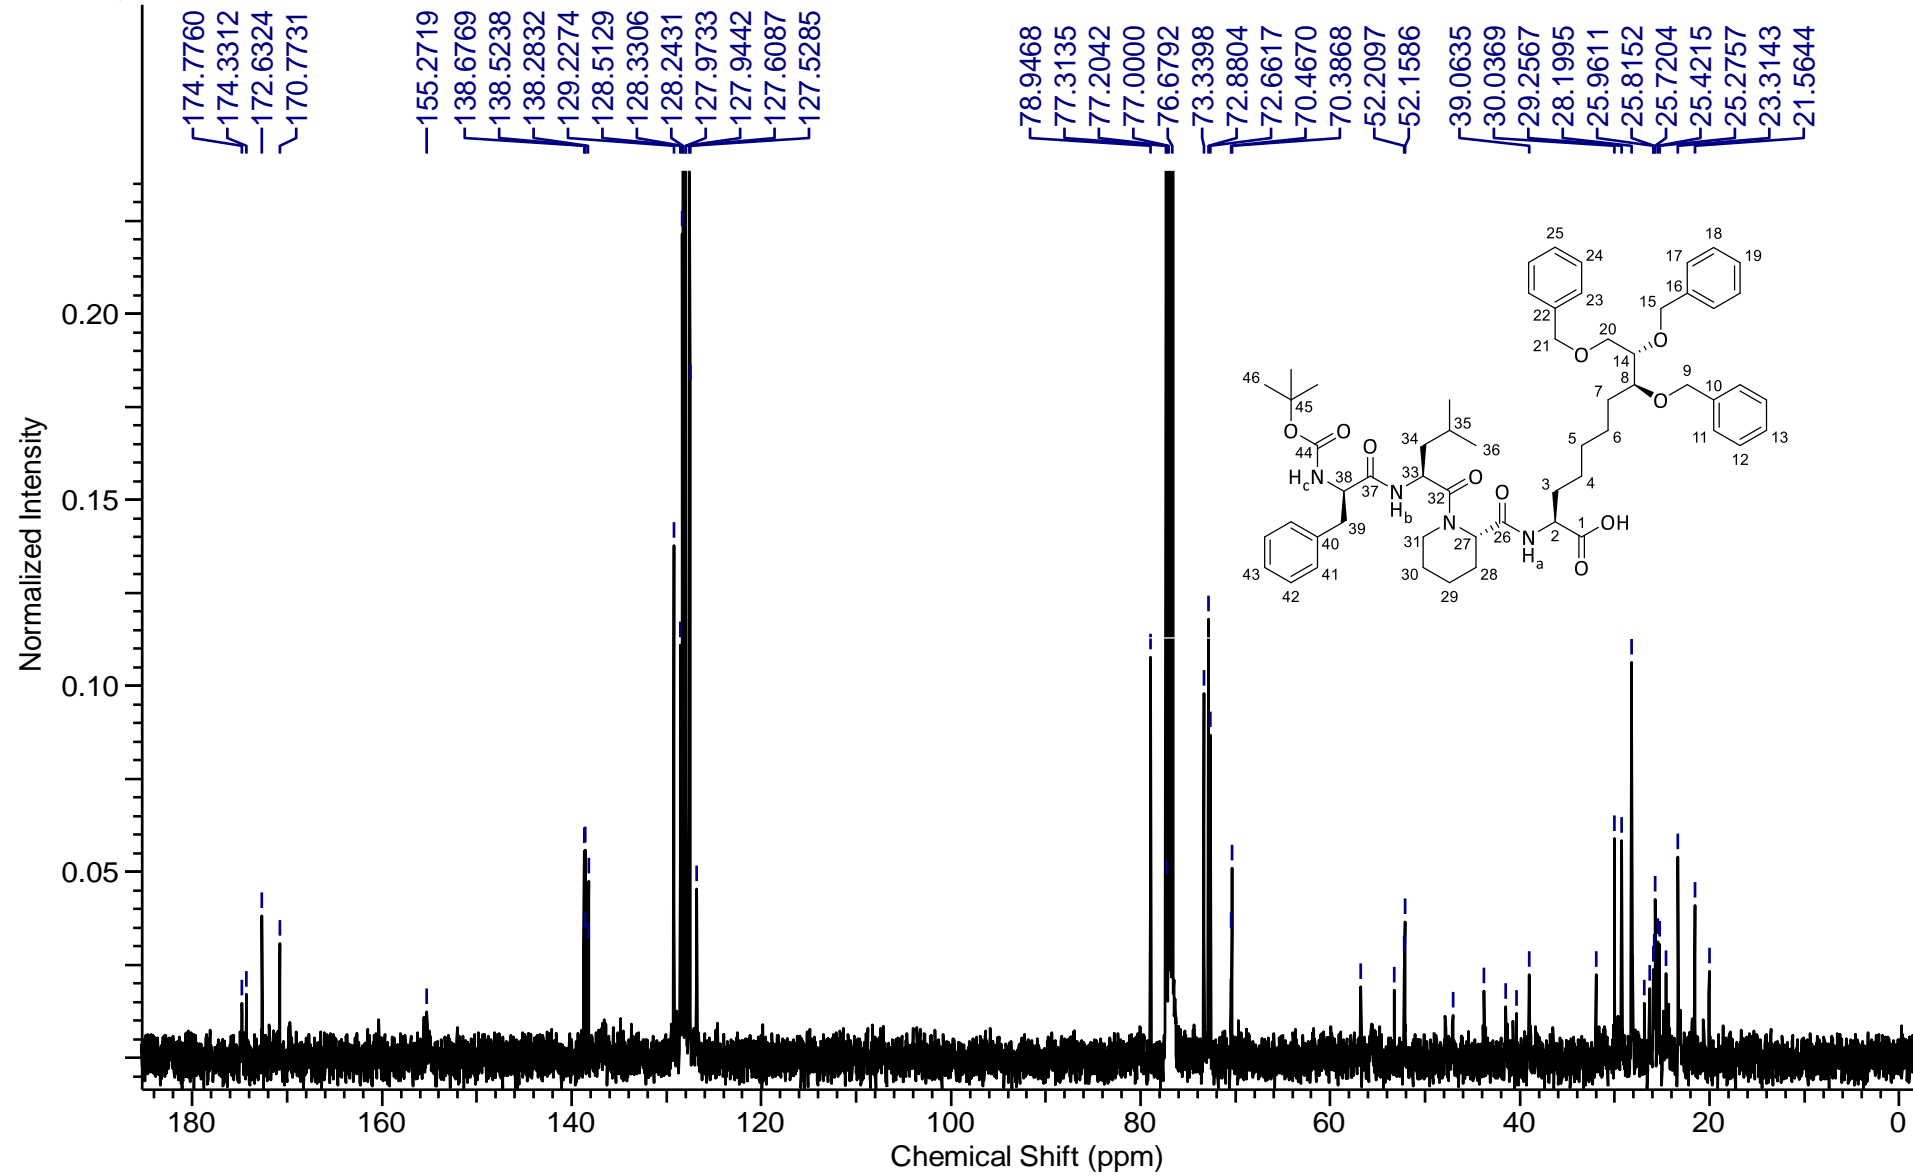

**(3*S*,6*R*,9*S*,15*aS*)-6-Benzyl-9-isobutyl-3-[(6*S*,7*S*)-6,7,8-tris(benzyloxy)octyl]octahydro-2*H*-pyrido[1,2-*a*][1,4,7,10]tetraazacyclododec-1,4,7,10(3*H*,12*H*)-tetraone (22)**

400 MHz, CDCl<sub>3</sub>

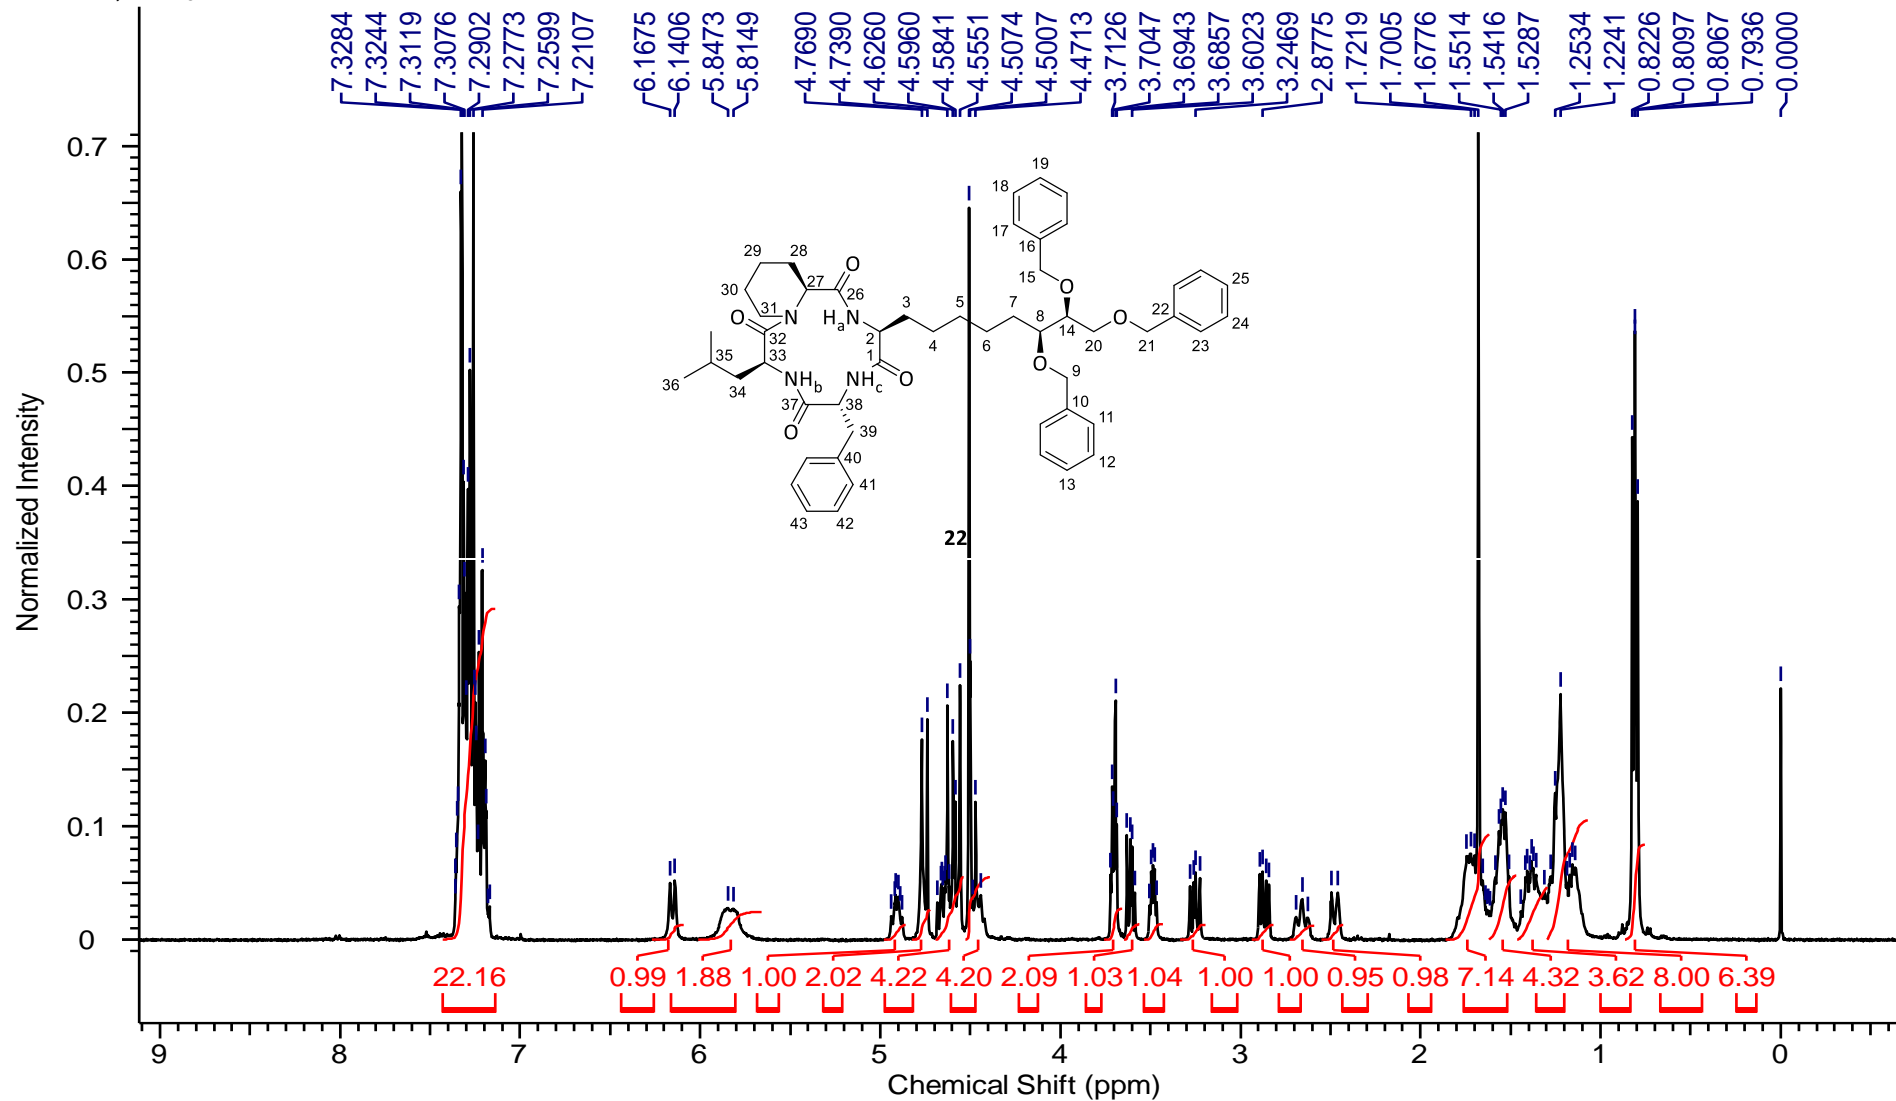



**(3*S*,6*R*,9*S*,15*aS*)-6-Benzyl-3-((*S*)-6-hydroxy-6-((*S*)-oxiran-2-yl)hexyl)-9-isobutyloctahydro-2*H*-pyrido[1,2-*a*][1,4,7,10]tetraazacyclododecyne-1,4,7,10(3*H*,12*H*)-tetraone (23)**

500 MHz, CDCl<sub>3</sub>

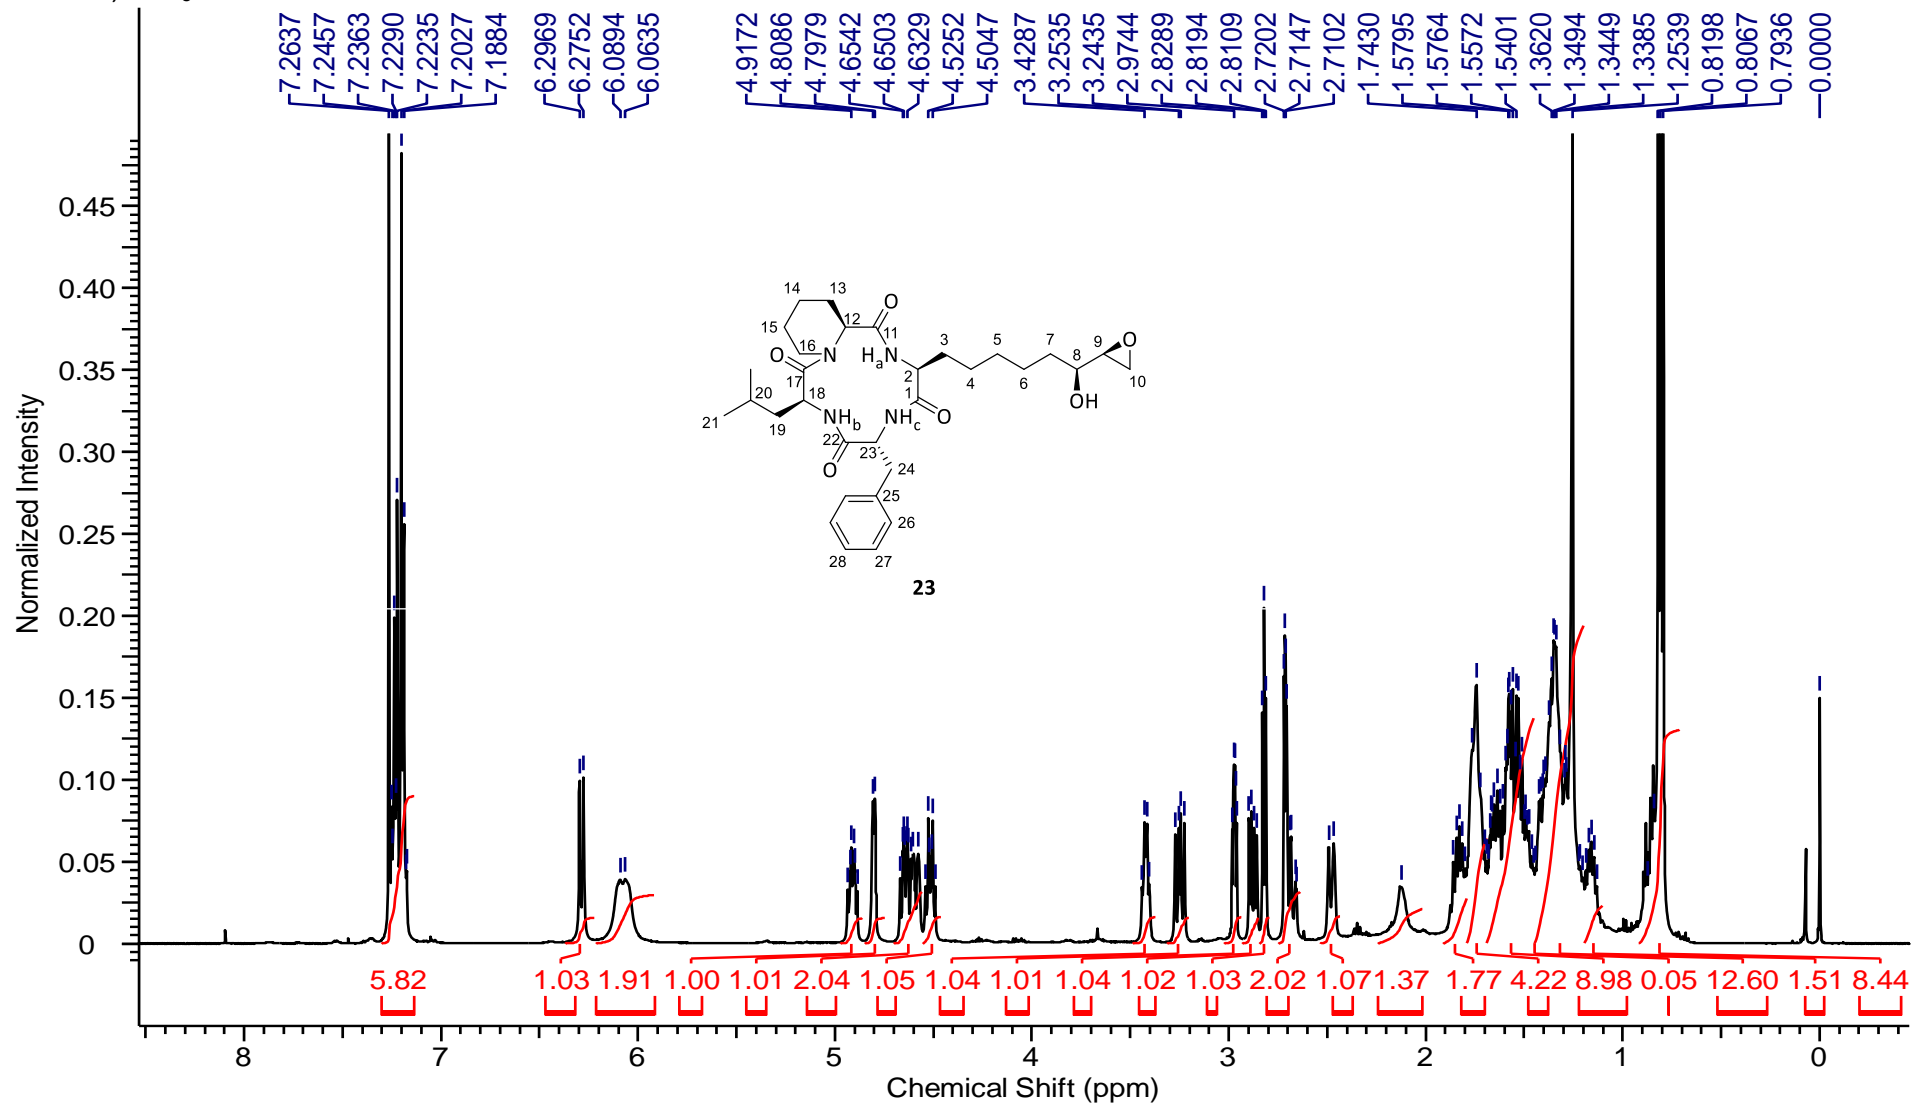





**WF-3161**

500 MHz, CDCl<sub>3</sub>

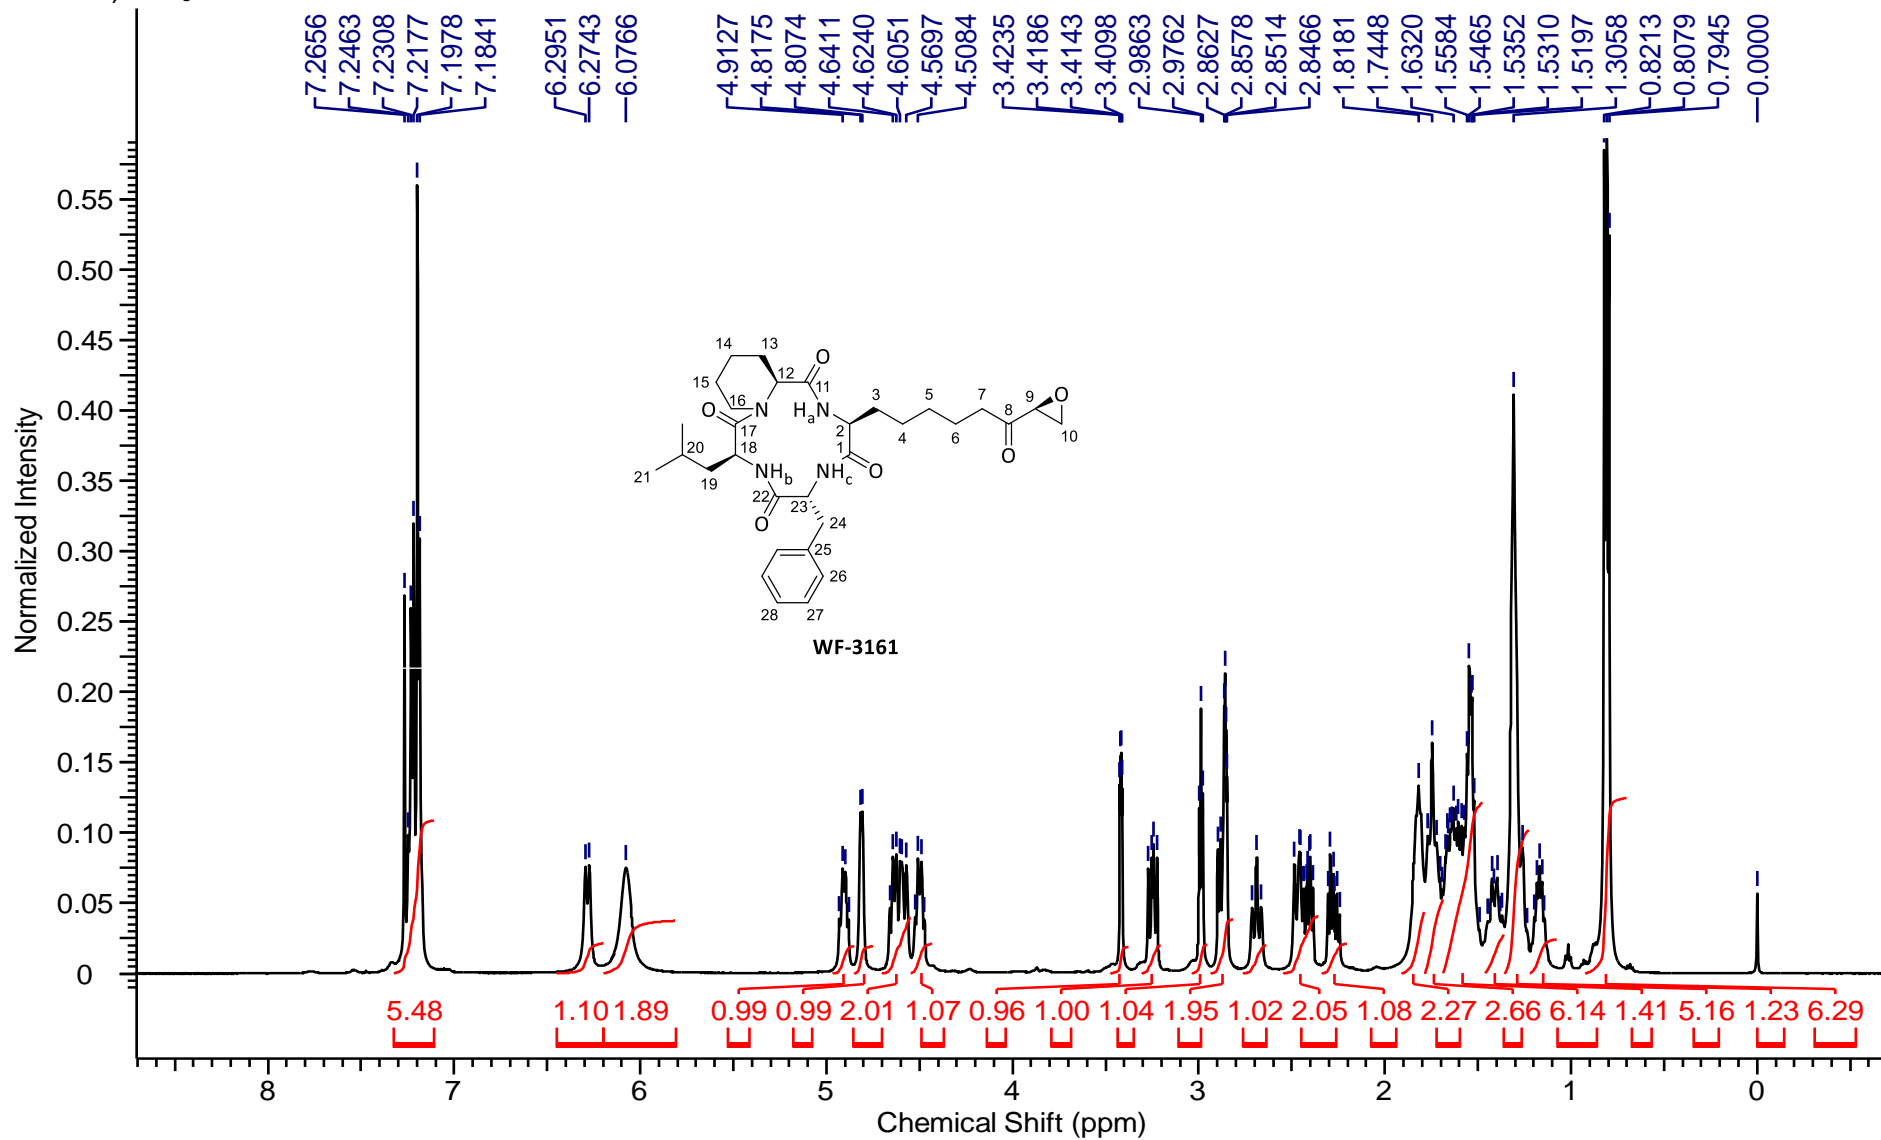

125 MHz, CDCl<sub>3</sub>

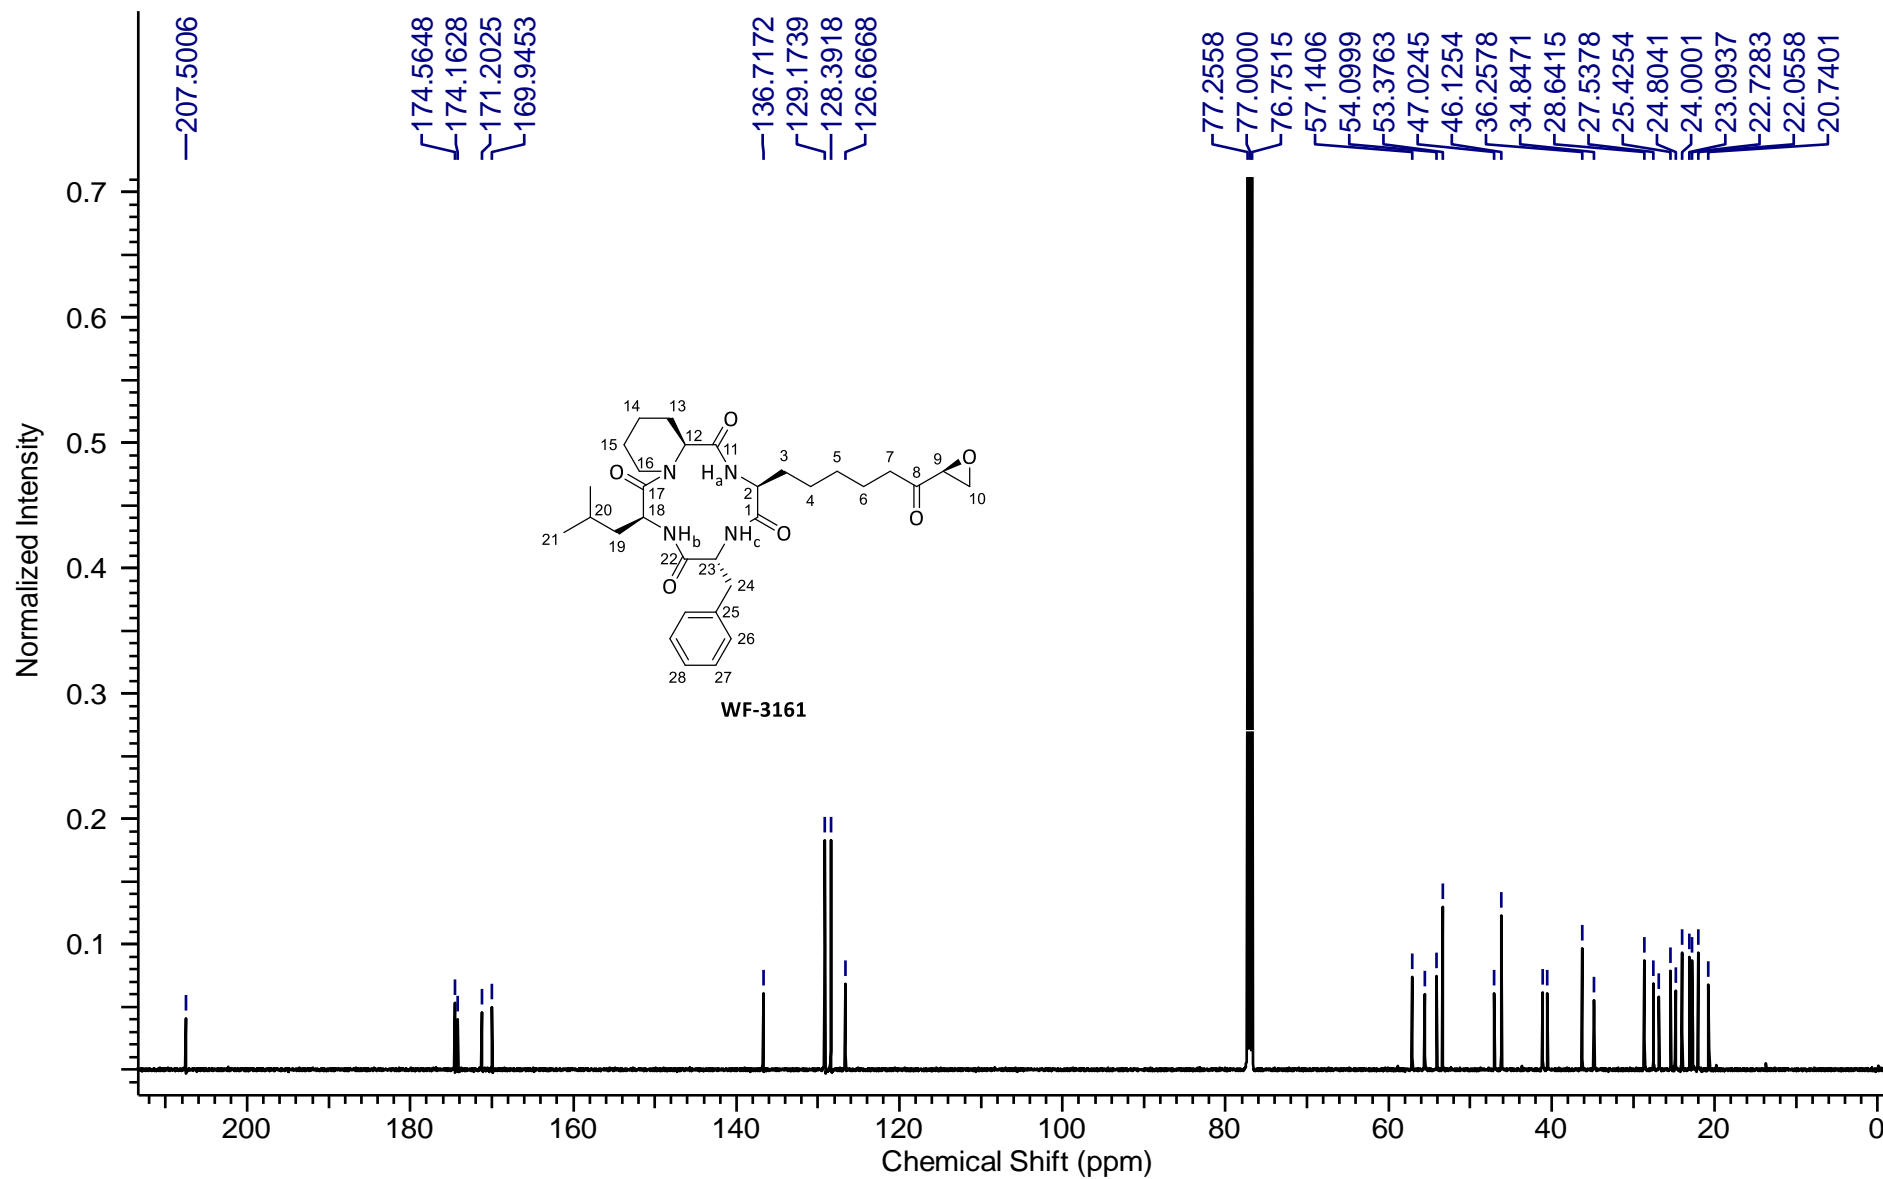

## Biological Assays

### In Vitro Testing on HDAC1, HDAC6 and HDAC8

Enzyme inhibition was determined by using a homogenous fluorescence assay as previously described (Heltweg, 2005)<sup>6</sup>. For HDAC1 and 6 activity testing, OptiPlate-96 black microplates (PerkinElmer) were used. Assay volume was 60  $\mu$ L, and 52  $\mu$ L of human recombinant HDAC1 (BPS Bioscience, catalog no. 50051) or human recombinant HDAC6 (BPS Bioscience, catalog no. 50006) in incubation buffer (50 mM Tris-HCl, pH 8.0, 137 mM NaCl, 2.7 mM KCl, 1 mM MgCl<sub>2</sub>, and 1 mg/mL bovine serum albumin) were incubated with increasing concentrations of inhibitors in DMSO and 5  $\mu$ L of the fluorogenic substrate ZMAL (Z-(Ac)Lys-AMC) (126  $\mu$ M) for 90 min at 37 °C. HDAC enzyme concentration was adjusted in order to have a final ZMAL conversion between 15 % and 30 %. After incubation time, an amount of 60  $\mu$ L of the stop solution, comprising 5  $\mu$ L TSA solution (33  $\mu$ M in DMSO) and 10  $\mu$ L trypsin (6 mg/mL) in trypsin buffer (Tris-HCl 50 mM, pH 8.0, NaCl 100 mM), was added. The plate was incubated again at 37 °C for 30 min, and fluorescence was measured on a BMG LABTECH POLARstar OPTIMA plate reader (BMG Labtechnologies, Germany) with an excitation wavelength of 390 nm and an emission wavelength of 460 nm. IC<sub>50</sub> values were determined using OriginPro 9G (OriginLab, USA) by a non-linear regression to fit the dose response curves. Pre-test experiments were performed in duplicates, IC<sub>50</sub> determination was carried out in triplicates.

Recombinant hHDAC8 was produced by Romier et al. in Strasbourg (M. Marek et al.)<sup>7</sup>. Inhibition of human HDAC8 was measured in 1/2 AREAPLATE- 96 F microplates (PerkinElmer) with an assay volume of 50  $\mu$ L. The activity assay was performed using a commercial HDAC8 Fluorimetric Drug Discovery Kit [Fluor de Lys(R)-HDAC8, BML-KI178] according to the manufacturer's instructions. The enzyme was incubated for 90 min at 37 °C, with a substrate concentration of 50  $\mu$ M and increasing concentrations of inhibitors. The stop-solution containing inhibitor, to stop the hHDAC8 activity, and Trypsin, to release AMC, was added. The solution was incubated for 20 min at 37 °C to develop the assay. Measurement was performed as described for HDAC1/6.

### In Vitro Testing on Human Sirt1-3 deacetylation

Enzyme inhibition was determined by using a homogenous fluorescence assay as previously described (Heltweg, 2003)<sup>8</sup>. The assay was performed in black 96 well plates (OptiPlate™ 96-F, Perkin Elmer, USA) with a reaction volume of 60  $\mu$ L per well. 47  $\mu$ L hSirt1(134-747), hSirt2 (56-356), and hSirt3 (101-399) in assay buffer (see HDAC1 and HDAC6) were mixed with 5  $\mu$ L of a substrate solution (10.5  $\mu$ M final concentration) and 3  $\mu$ L of inhibitor dissolved in DMSO at various concentrations or 3  $\mu$ L of DMSO as control (final assay concentration 5 % (v/v)). 5  $\mu$ L of NAD<sup>+</sup> solution (3.98 mg/mL in assay buffer, final assay concentration 500  $\mu$ M) were added in order to start the reaction. The reaction was incubated for 4 h at 37 °C. hSirt assay concentration was adjusted in order to have a final ZMAL conversion between 15 % and 30 %. After the first incubation, 60  $\mu$ L of stop solution (50 mM Tris, 100 mM NaCl, 6.7 % (v/v) DMSO, trypsin 1 mg/mL, 8 mM nicotinamide, pH=8.0) were added. The microplate was incubated further for 20 min at 37 °C and fluorescence intensity was measured as described for HDAC1/6. As blank control a solution containing ZMAL without the enzyme was used. IC<sub>50</sub> values were determined using OriginPro 9G (OriginLab, USA) by a non-linear regression to fit the dose response curves. Pre-test experiments were performed in duplicates, IC<sub>50</sub> determination was carried out in triplicates.

---

<sup>6</sup> B. Heltweg, J. Trapp, M. Jung, *Methods*, 2005, **36**, 332–337.

<sup>7</sup> M. Marek, S. Kannan, A. T. Hauser, M. Moraes Mourão, S. Caby, V. Cura, D. A. Stolfa, K. Schmidtkunz, J. Lancelot, L. Andrade, J. P. Renaud, G. Oliveira, W. Sippl, M. Jung, J. Cavarelli; R. J. Pierce, C. Romier, *PLoS Pathog.* 2013, **9**, e1003645

<sup>8</sup> B. Heltweg, M. Jung, *SLAS Discovery*, 2003, **8**, 89–95.

### **Cell Viability Assay**

Cell viability were assessed using the Celltiter 96 Aqueous nonradioactive Proliferation Assay (Promega). HL60 cells with a cell density of  $5 \times 10^3$  cells per well, were immediately incubated in a 96-well tissue culture plate with inhibitor or DMSO vehicle to a total volume of 100  $\mu$ L for 72 hours. As HL60 cells already differentiate with 1 % DMSO content, inhibitors were prepared as 200x stock solutions in DMSO. In all cases inhibitors were compared to DMSO vehicle only and three replicates per concentration were used. Cell viability was determined according to the manufacturer's instructions. Data was plotted as absorbance units against logarithm of compound concentration using OriginPro 9. 50% Growth inhibition ( $GI_{50}$ ) was determined as compound concentration required to reduce the number of metabolically active cells by 50% compared to DMSO control.
